# Supplementary material for: Optimising the cost and delivery of HIV counselling and testing services in Kenya and Swaziland
Source: HighWire-hosted journal article supplement (doi:10.1136/sextrans-2012-050544), 2012-08-02
Supplement: sextrans-2012-050544supp_appendix.pdf [file sextrans-2012-050544supp_appendix.pdf]

## **Supplementary Material**

COVID-19 vaccination implementation in 52 African countries:  
trajectory and Implications for future pandemic preparedness

## Data Sources

We extracted daily COVID-19 vaccination data covering the initial nine months of vaccine deployment from Our World in Data online database,<sup>1</sup> while data on the population of each included country were extracted from the UN World Population Prospects 2020.<sup>2</sup> Data on the number of COVID-19 cases and mortality per country were obtained from Our World in Data,<sup>3</sup> while life expectancy per country was extracted from the World Bank life expectancy database.<sup>4</sup>

**Table S1: Summary of data sources, including the variables extracted, year, and date of extraction**

| Data source (reference)                                     | Data extracted and period covered                                                         | Date of extraction |
|-------------------------------------------------------------|-------------------------------------------------------------------------------------------|--------------------|
| Our World in Data <sup>1</sup>                              | Country-level COVID-19 vaccination data in the initial nine months of vaccine deployment  | 15 Feb. 2022       |
| UN World Population Prospects 2020 <sup>2</sup>             | Country-level total population (2020)                                                     | 15 Feb. 2022       |
| Our World in Data COVID-19 database <sup>3</sup>            | COVID-19 cases and mortality per country in the initial nine months of vaccine deployment | 16 Feb. 2022       |
| The World Bank life expectancy database <sup>4</sup>        | Country-level life expectancy at birth (2020)                                             | 22 Feb. 2022       |
| UN Development Programme database <sup>2</sup>              | Country-level human development index (2020)                                              | 22 Feb. 2022       |
| The World Bank Country lending groups database <sup>5</sup> | Country income category (2020)                                                            | 22 Feb. 2022       |

**Table S2. Model parameters and values used in the analysis with their references**

| Parameter description      | Parameter symbol | Range/value      | Reference |
|----------------------------|------------------|------------------|-----------|
| Effective contact rate     | $\beta$          | Model fitting    | -         |
| Incubation period          | $1/\rho$         | 3-7 days         | 6,7       |
| Infectious period          | $1/\kappa$       | 2-5 days         | 6         |
| Life expectancy            | $1/\mu$          | Country specific | 4         |
| Vaccination rate           | $\omega$         | Model fitting    | 8         |
| Vaccine effectiveness      | $\varepsilon$    | 0.86             | 9         |
| Death rate due to COVID-19 | $\delta$         | Country specific | 3         |

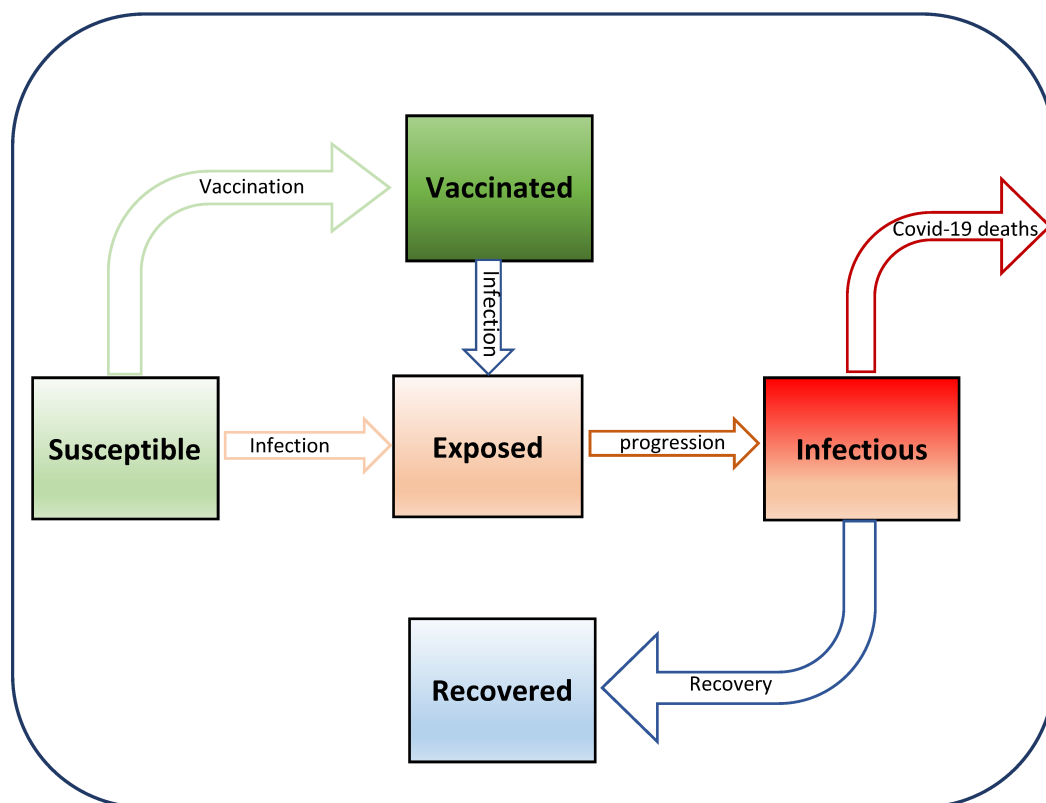

**Supplementary Figure S1:** Model flow diagram showing how individuals move from the susceptible, vaccinated, exposed, infectious and recovered states.

**Table S3: Predicted (modelled), observed, and the percent points difference between the modelled or projected and observed/actual vaccination coverage achieved as of December 2022.**

| Country                          | Observed Coverage (OC) | Predicted Coverage (PC) [95% credible interval] | Difference (OC-PC) |
|----------------------------------|------------------------|-------------------------------------------------|--------------------|
| Burundi                          | 0.23                   | 2 [1.27, 5.24]                                  | -1.77              |
| Chad                             | 20.5                   | 2 (1.12, 11.39)                                 | 18.5               |
| Democratic Republic of the Congo | 6.9                    | 2 [1.56, 12.53]                                 | 4.9                |
| Niger                            | 20.3                   | 7 [2.98, 9.96]                                  | 13.3               |
| Nigeria                          | 27.4                   | 7 [3.80, 18.91]                                 | 20.4               |
| Madagascar                       | 7.1                    | 8 [3.38, 10.17]                                 | -0.9               |
| South Sudan                      | 20.4                   | 8 [0.60, 20.74]                                 | 12.4               |
| Mali                             | 11.8                   | 9 [1.35, 13.24]                                 | 2.8                |
| Tanzania                         | 44.7                   | 9 [2.53, 14.70]                                 | 35.7               |
| Cameroon                         | 9.8                    | 10 [1.07, 16.10]                                | -0.2               |
| Malawi                           | 15.2                   | 10 [4.94, 24.90]                                | 5.2                |
| Somalia                          | 35.9                   | 10 [4.36, 15.04]                                | 25.9               |
| Senegal                          | 8.3                    | 12 [6.22, 18.32]                                | -3.7               |
| Burkina Faso                     | 14.7                   | 12 [4.07, 25.02]                                | 2.7                |
| Sudan                            | 17.7                   | 12 [6.86, 22.35]                                | 5.7                |
| Guinea Bissau                    | 17.2                   | 13 [2.17, 25.12]                                | 4.2                |
| Congo                            | 11                     | 15 [2.04, 22.69]                                | -4                 |
| Zambia                           | 42.7                   | 16 [11.50, 23.58]                               | 26.7               |
| Djibouti                         | 26.5                   | 17 [8.81, 21.59]                                | 9.5                |
| Uganda                           | 27.4                   | 17 [5.77, 22.56]                                | 10.4               |
| Gabon                            | 10.8                   | 19 [7.75, 22.17]                                | -8.2               |
| Togo                             | 16.5                   | 21 [14.20, 35.11]                               | -4.5               |
| Equatorial Guinea                | 13                     | 23 [13.55, 35.96]                               | -10                |
| Guinea                           | 23.7                   | 23 [20.08, 26.47]                               | 0.7                |
| Sierra Leone                     | 40                     | 26 [17.79, 38.41]                               | 14                 |
| Gambia                           | 16.8                   | 27 [12.78, 36.53]                               | -10.2              |
| Cote d'Ivoire                    | 41.4                   | 28 [13.62, 36.07]                               | 13.4               |
| Kenya                            | 20                     | 29 [15.84, 33.94]                               | -9                 |
| Ethiopia                         | 30.3                   | 30 [15.99, 35.73]                               | 0.3                |
| Libya                            | 18.2                   | 33 [29.97, 37.12]                               | -14.8              |
| Namibia                          | 20.5                   | 36 [31.12, 38.15]                               | -15.5              |
| Central African Republic         | 34.7                   | 37 [26.37, 51.09]                               | -2.3               |
| Zimbabwe                         | 29.1                   | 38 [33.37, 46.49]                               | -8.9               |
| Angola                           | 23.3                   | 41 [34.40, 54.60]                               | -17.7              |
| Benin                            | 20.5                   | 46 [38.06, 48.47]                               | -25.5              |
| Ghana                            | 27.4                   | 46 [32.71, 51.40]                               | -18.6              |
| South Africa                     | 35.1                   | 48 [40.11, 51.40]                               | -12.9              |
| Comoros                          | 47.5                   | 56 [49.77, 66.21]                               | -8.5               |
| Mauritania                       | 32.5                   | 56 [45.72, 67.09]                               | -23.5              |
| Sao Tome and Principe            | 45.7                   | 57 [49.60, 69.46]                               | -11.3              |
| Eswatini                         | 34.4                   | 58 [52.41, 71.39]                               | -23.6              |
| Liberia                          | 70.4                   | 58 [54.58, 62.87]                               | 12.4               |

|            |      |                   |       |
|------------|------|-------------------|-------|
| Egypt      | 36.1 | 59 [52.68, 63.19] | -22.9 |
| Tunisia    | 51.7 | 72 [66.25, 77.23] | -20.3 |
| Cape Verde | 52.1 | 74 [61.89, 83.27] | -21.9 |
| Lesotho    | 40.2 | 74 [71.96, 86.15] | -33.8 |
| Mozambique | 56   | 74 [67.20, 88.86] | -18   |
| Rwanda     | 71.8 | 78 [64.12, 92.53] | -6.2  |
| Seychelles | 76.2 | 83 [73.43, 95.38] | -6.8  |
| Morocco    | 62.8 | 84 [78.34, 91.93] | -21.2 |
| Botswana   | 54.2 | 87 [75.01, 95.33] | -32.8 |
| Mauritius  | 83.7 | 97 [91.39, 99.10] | -13.3 |

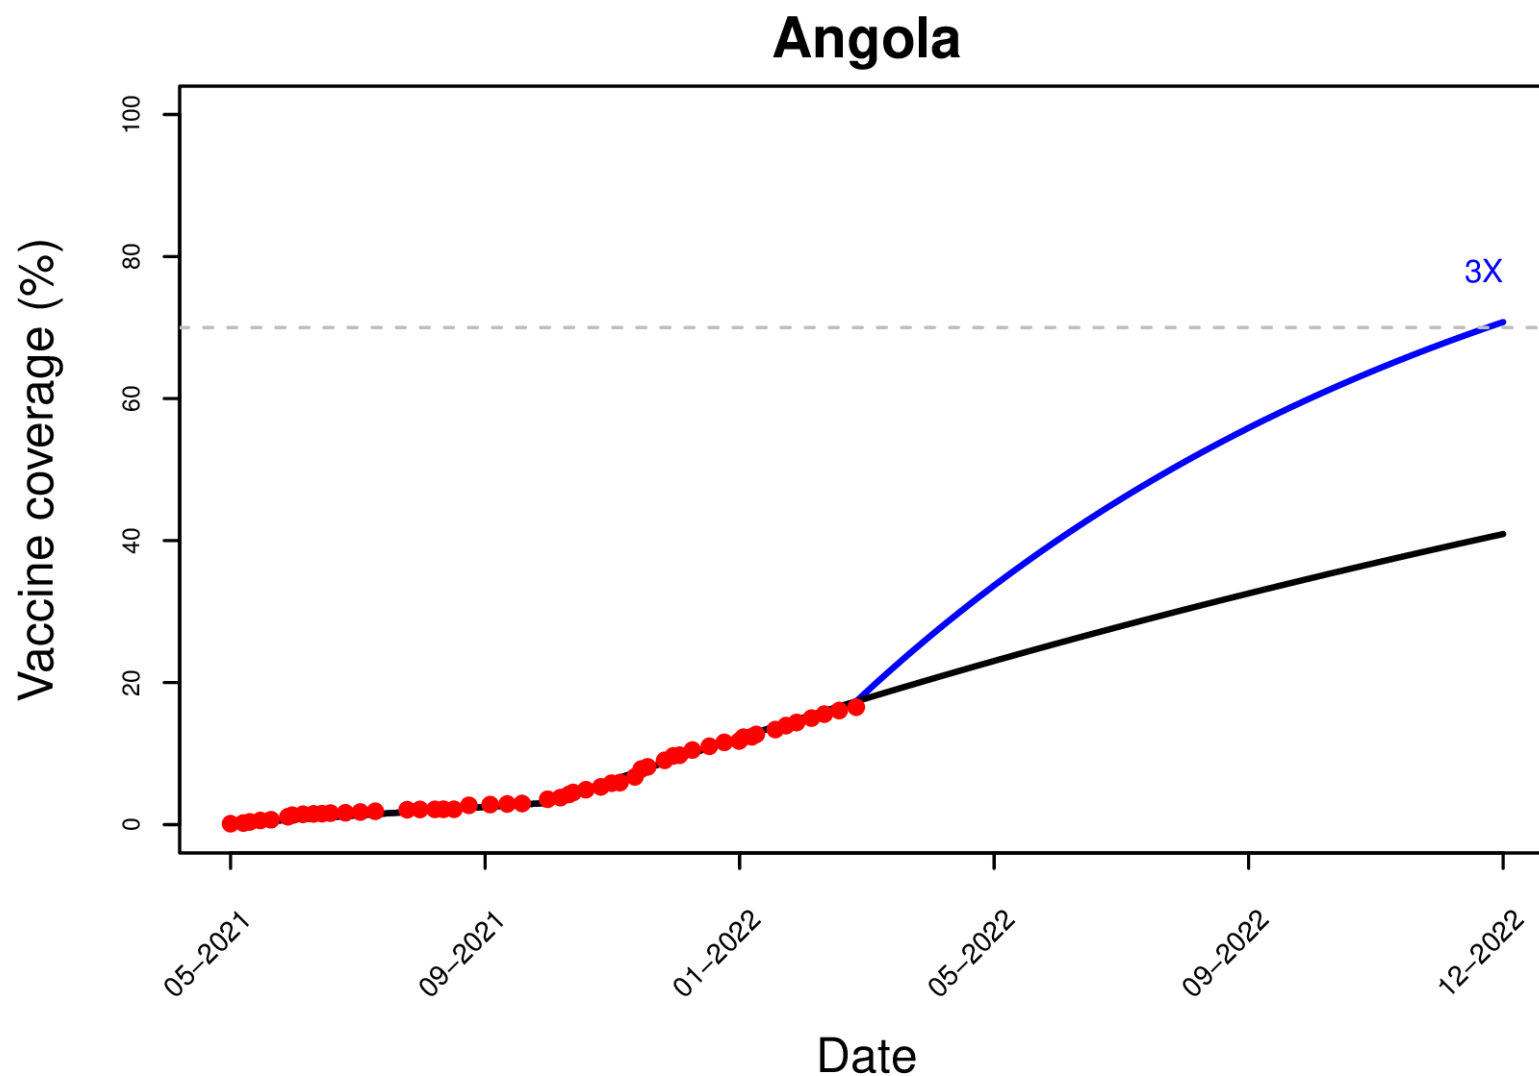

**Supplementary Figure S2:** Graphs showing model vaccination coverage trends from the model (black line) and vaccination coverage data (red dots). The blue lines show vaccine coverage trends when vaccination rates are increased (from current rates) to reach 70% by end of December 2022. Grey dashed lines indicate the 70% coverage target. The numbers show how much vaccination coverage rate should be increased by to reach that target.

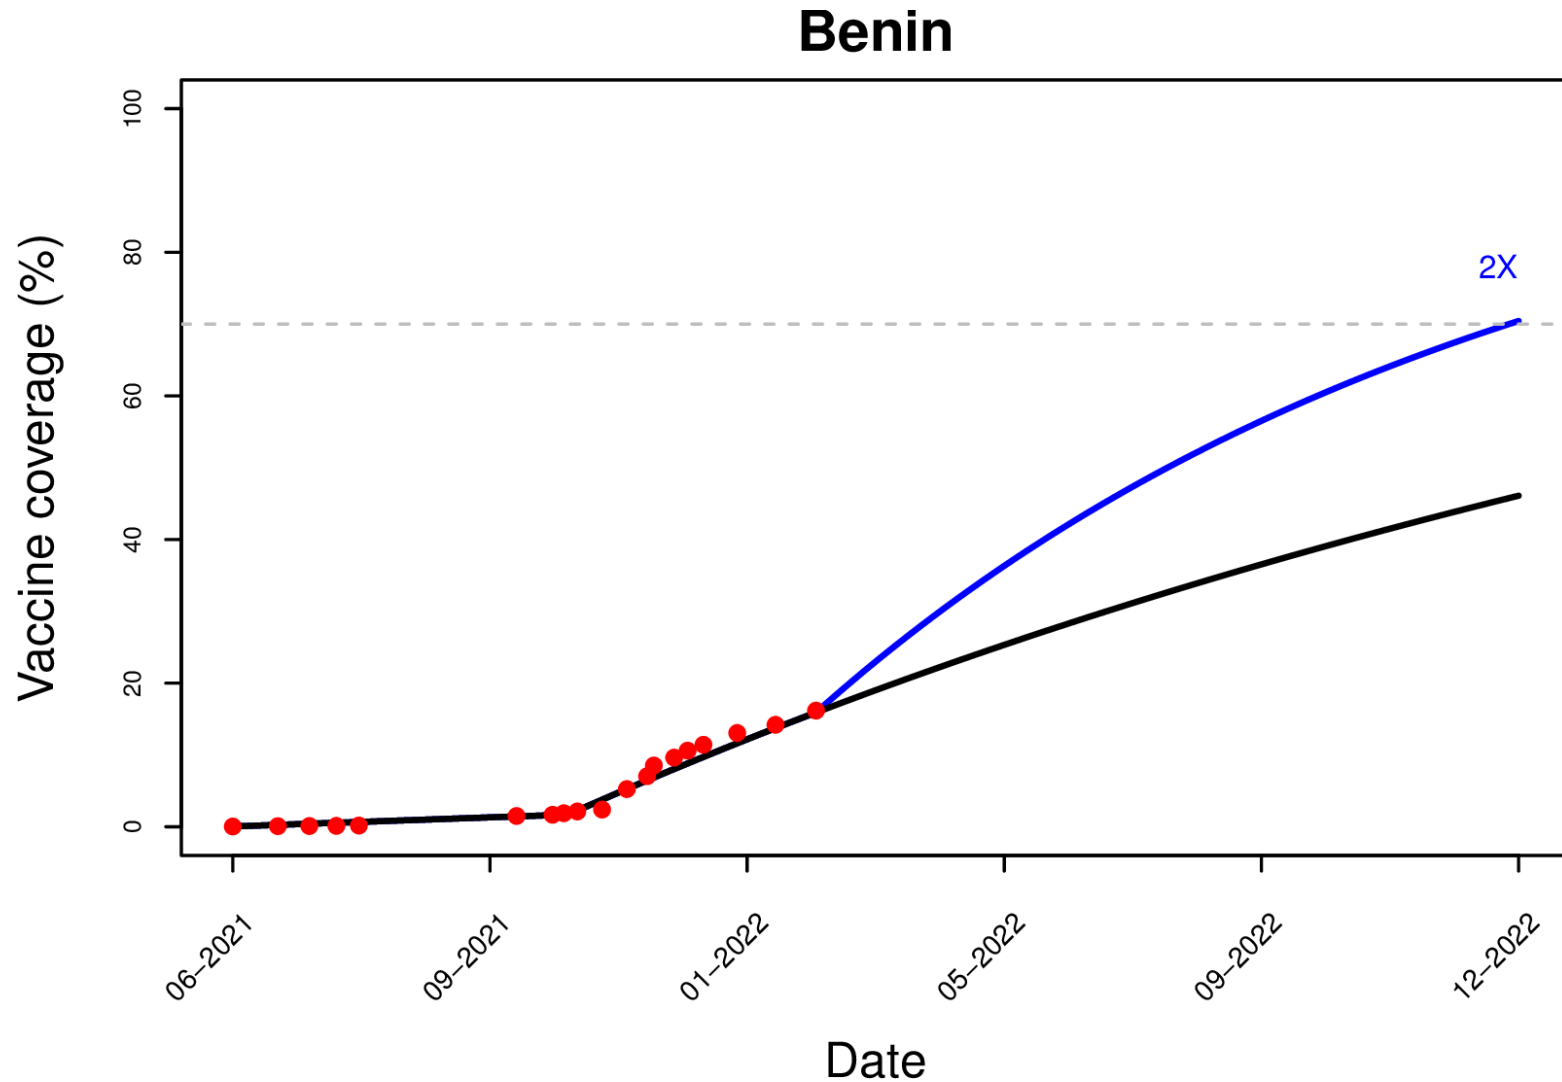

**Supplementary Figure S3:** Graphs showing model vaccination coverage trends from the model (black line) and vaccination coverage data (red dots). The blue lines show vaccine coverage trends when vaccination rates are increased (from current rates) to reach 70% by end of December 2022. Grey dashed lines indicate the 70% coverage target. The numbers show how much vaccination coverage rate should be increased by to reach that target.

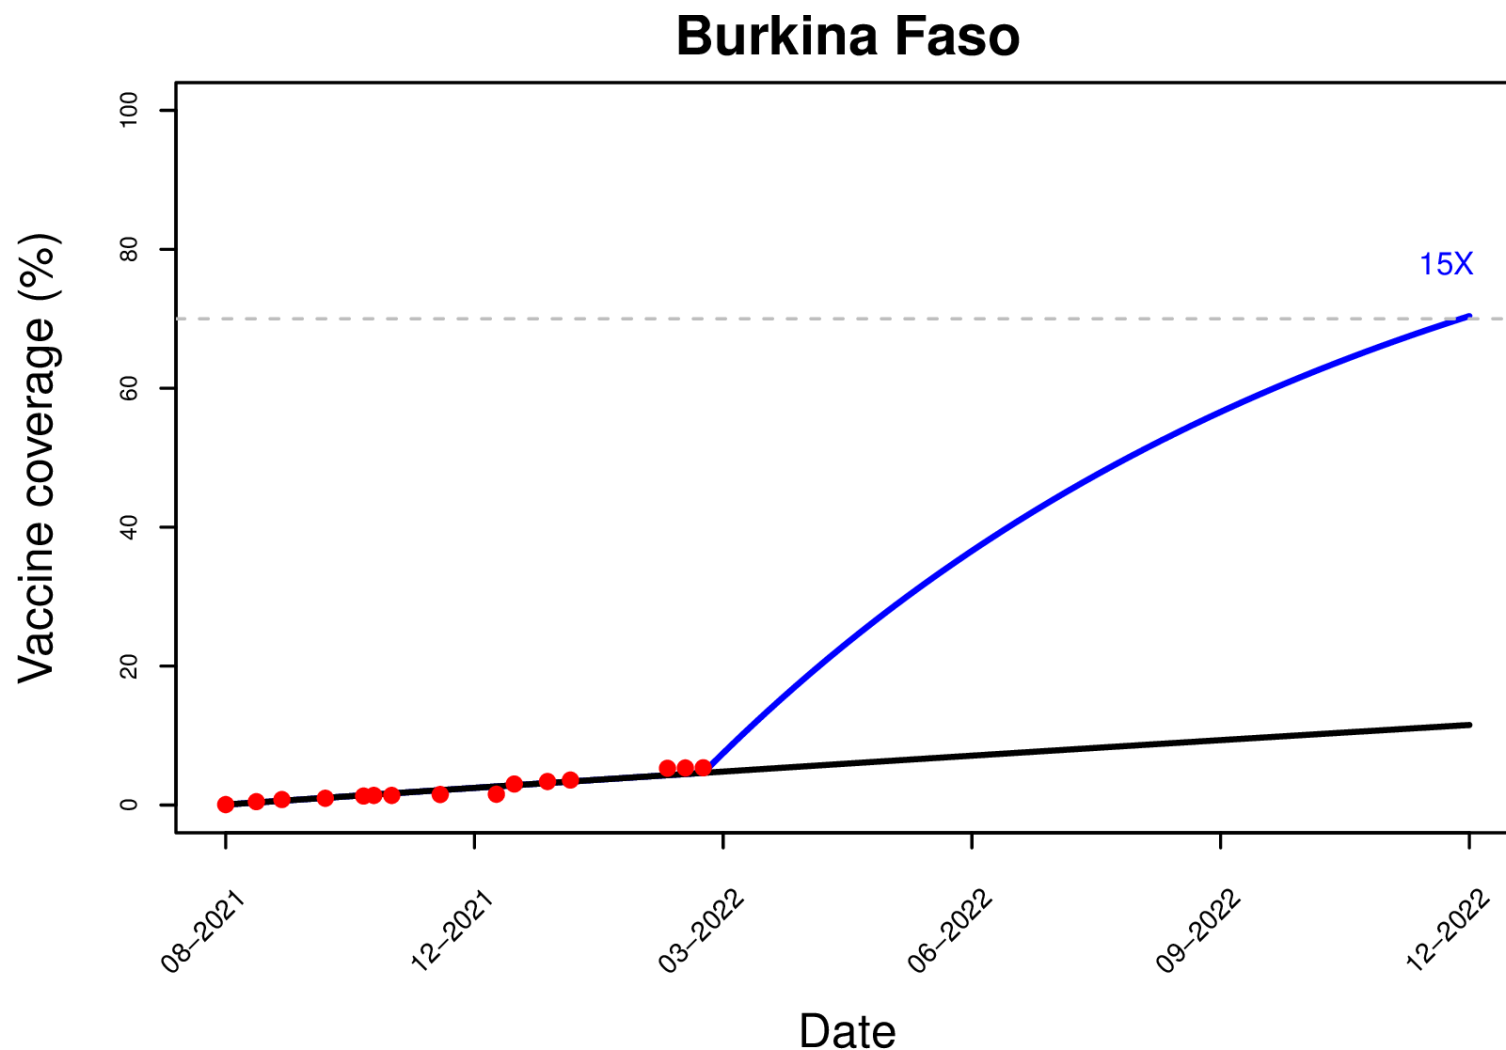

**Supplementary Figure S4:** Graphs showing model vaccination coverage trends from the model (black line) and vaccination coverage data (red dots). The blue lines show vaccine coverage trends when vaccination rates are increased (from current rates) to reach 70% by end of December 2022. Grey dashed lines indicate the 70% coverage target. The numbers show how much vaccination coverage rate should be increased by to reach that target



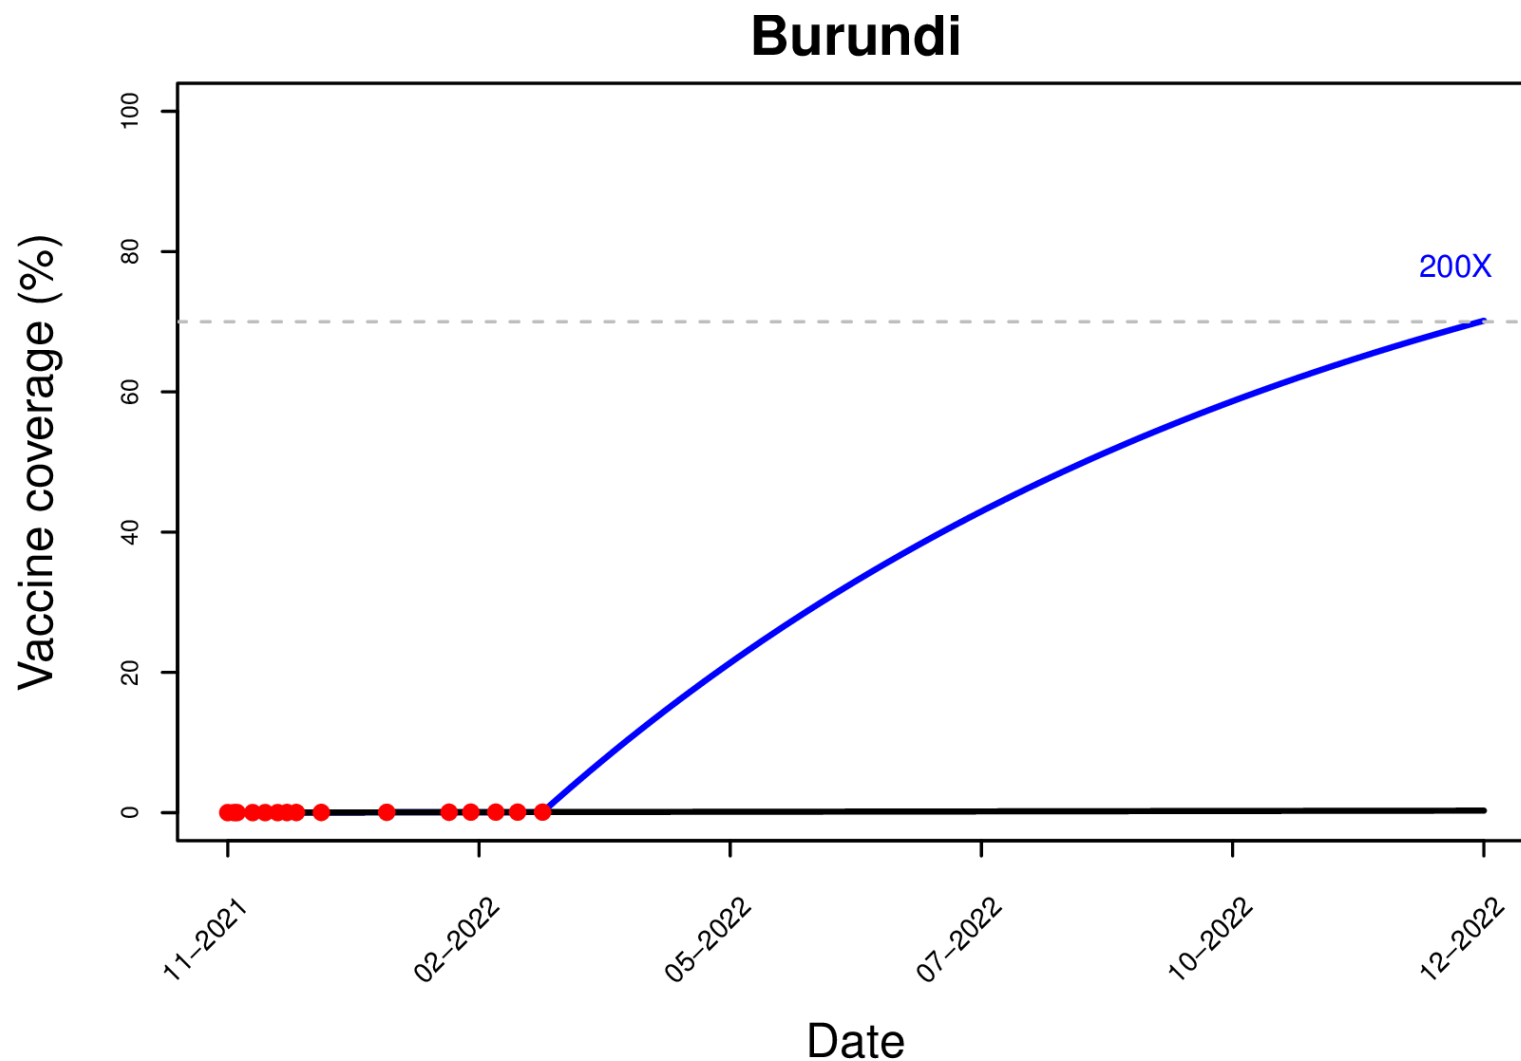

**Supplementary Figure S5:** Graphs showing model vaccination coverage trends from the model (black line) and vaccination coverage data (red dots). The blue lines show vaccine coverage trends when vaccination rates are increased (from current rates) to reach 70% by end of December 2022. Grey dashed lines indicate the 70% coverage target. The numbers show how much vaccination coverage rate should be increased by to reach that target

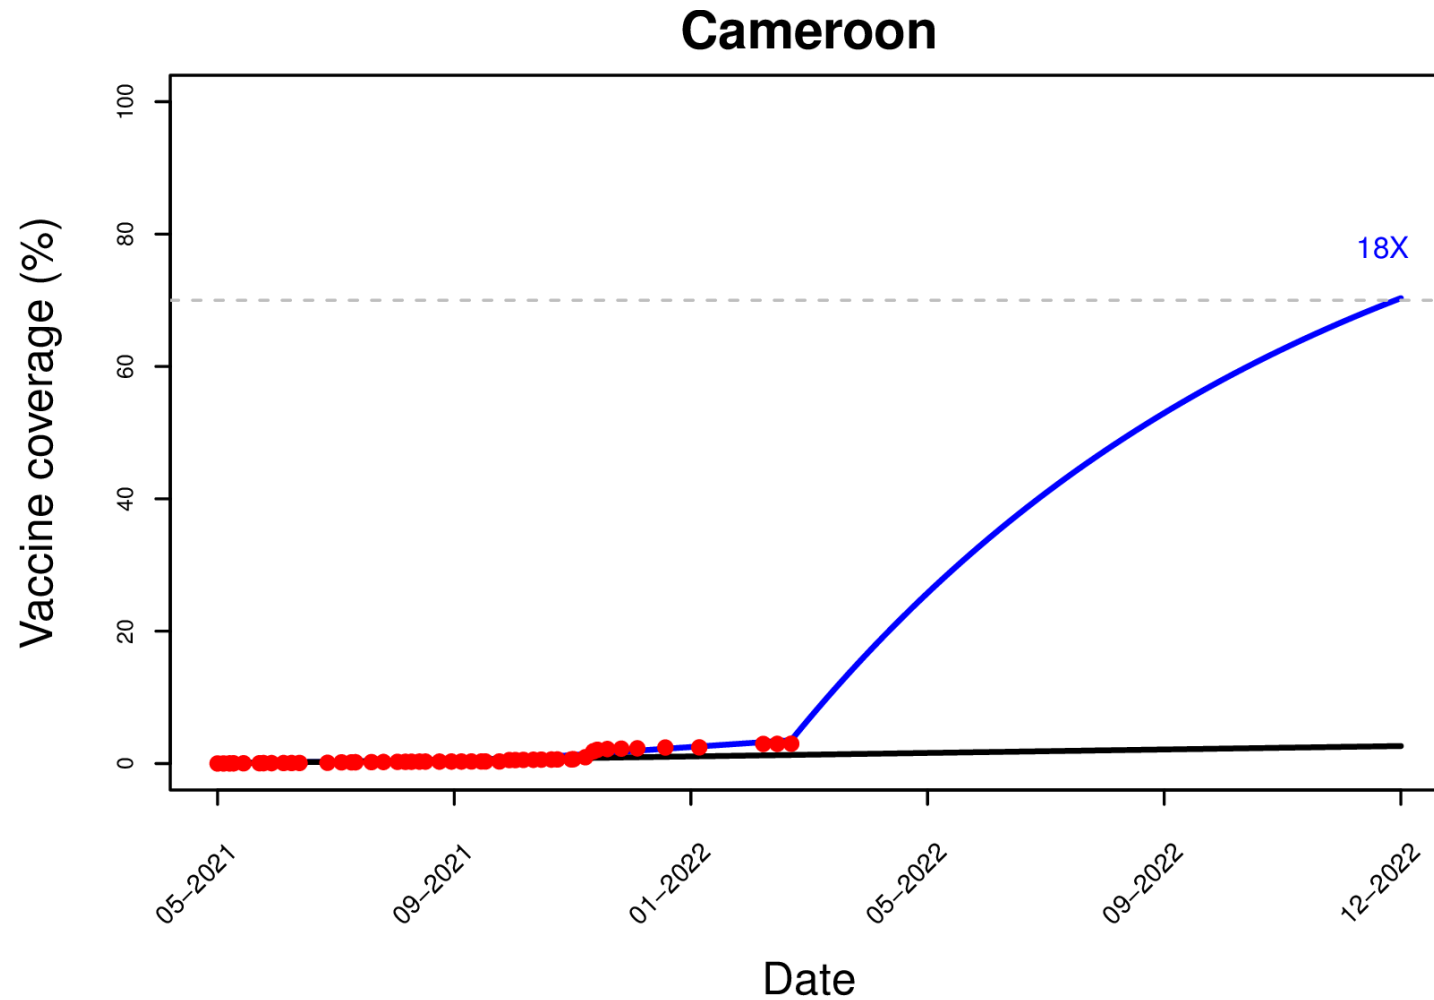

**Supplementary Figure S6:** Graphs showing model vaccination coverage trends from the model (black line) and vaccination coverage data (red dots). The blue lines show vaccine coverage trends when vaccination rates are increased (from current rates) to reach 70% by end of December 2022. Grey dashed lines indicate the 70% coverage target. The numbers show how much vaccination coverage rate should be increased by to reach that target

## Central African Republic

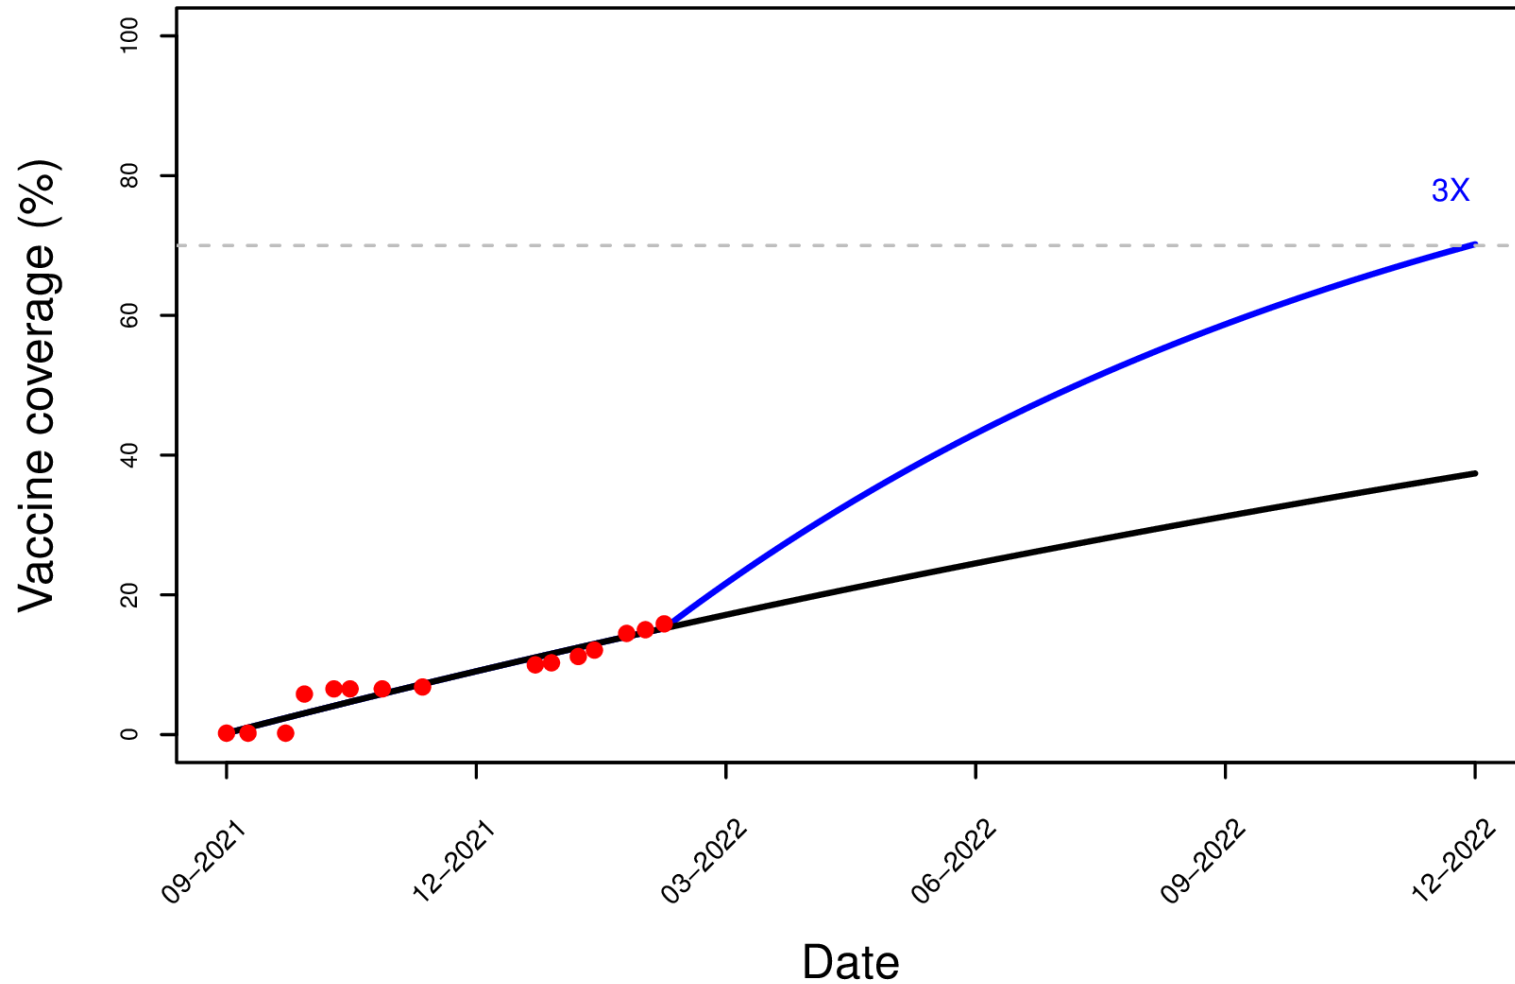

**Supplementary Figure S7:** Graphs showing model vaccination coverage trends from the model (black line) and vaccination coverage data (red dots). The blue lines show vaccine coverage trends when vaccination rates are increased (from current rates) to reach 70% by end of December 2022. Grey dashed lines indicate the 70% coverage target. The numbers show how much vaccination coverage rate should be increased by to reach that target

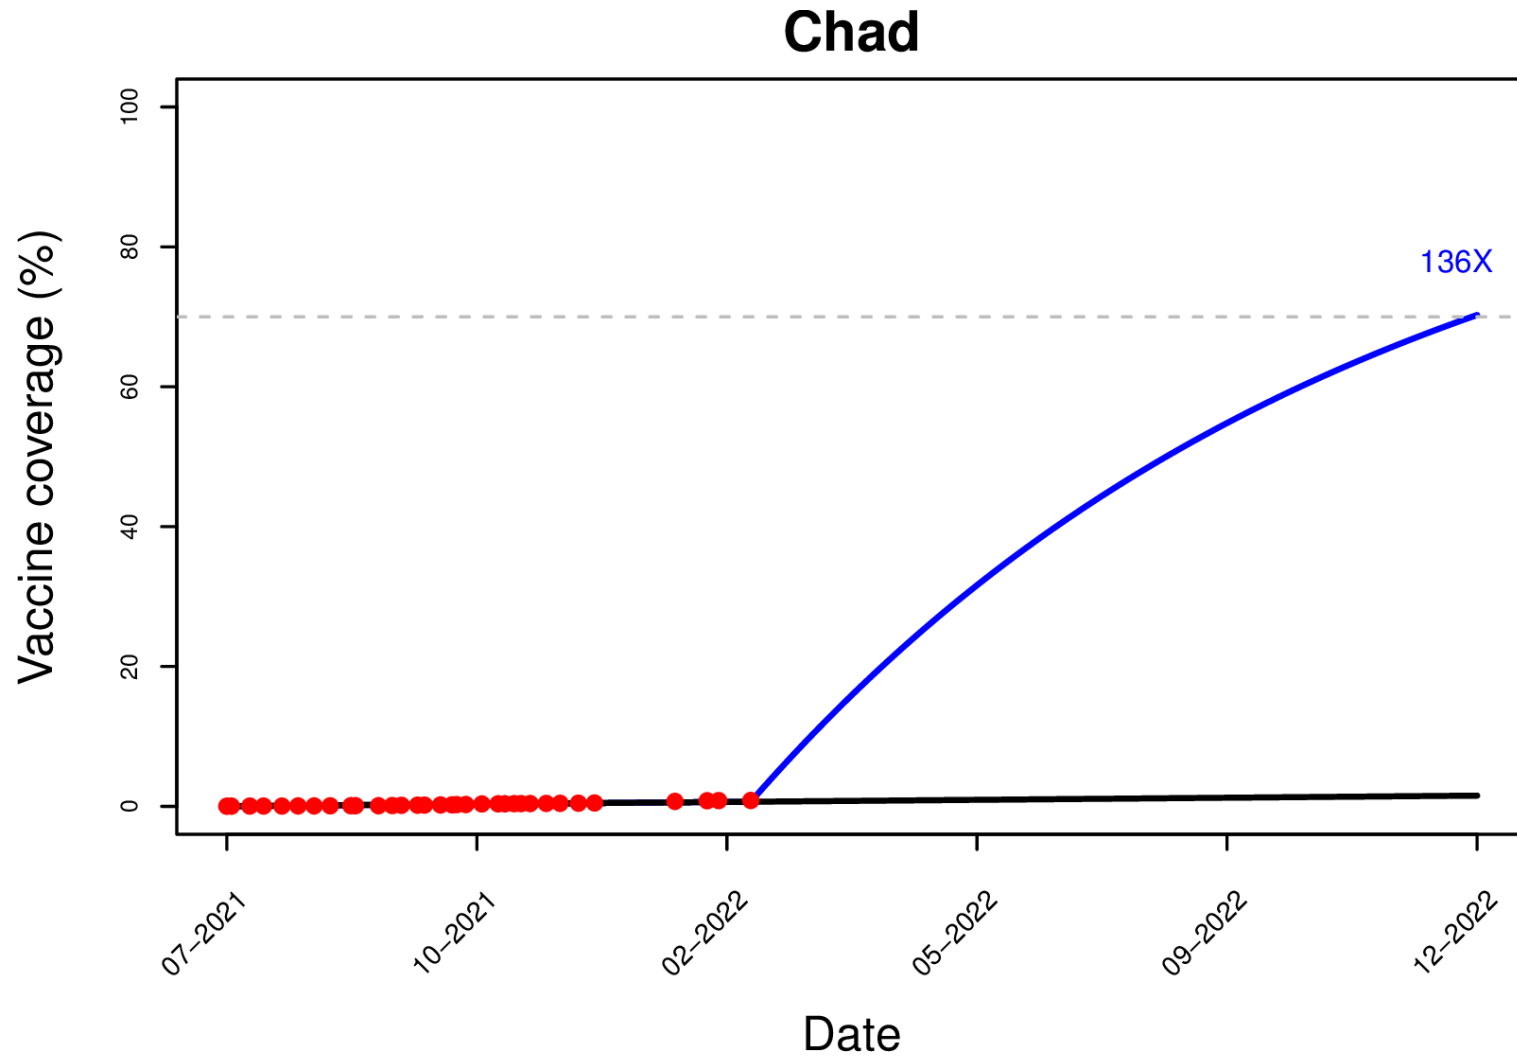

**Supplementary Figure S8:** Graphs showing model vaccination coverage trends from the model (black line) and vaccination coverage data (red dots). The blue lines show vaccine coverage trends when vaccination rates are increased (from current rates) to reach 70% by end of December 2022. Grey dashed lines indicate the 70% coverage target. The numbers show how much vaccination coverage rate should be increased by to reach that target

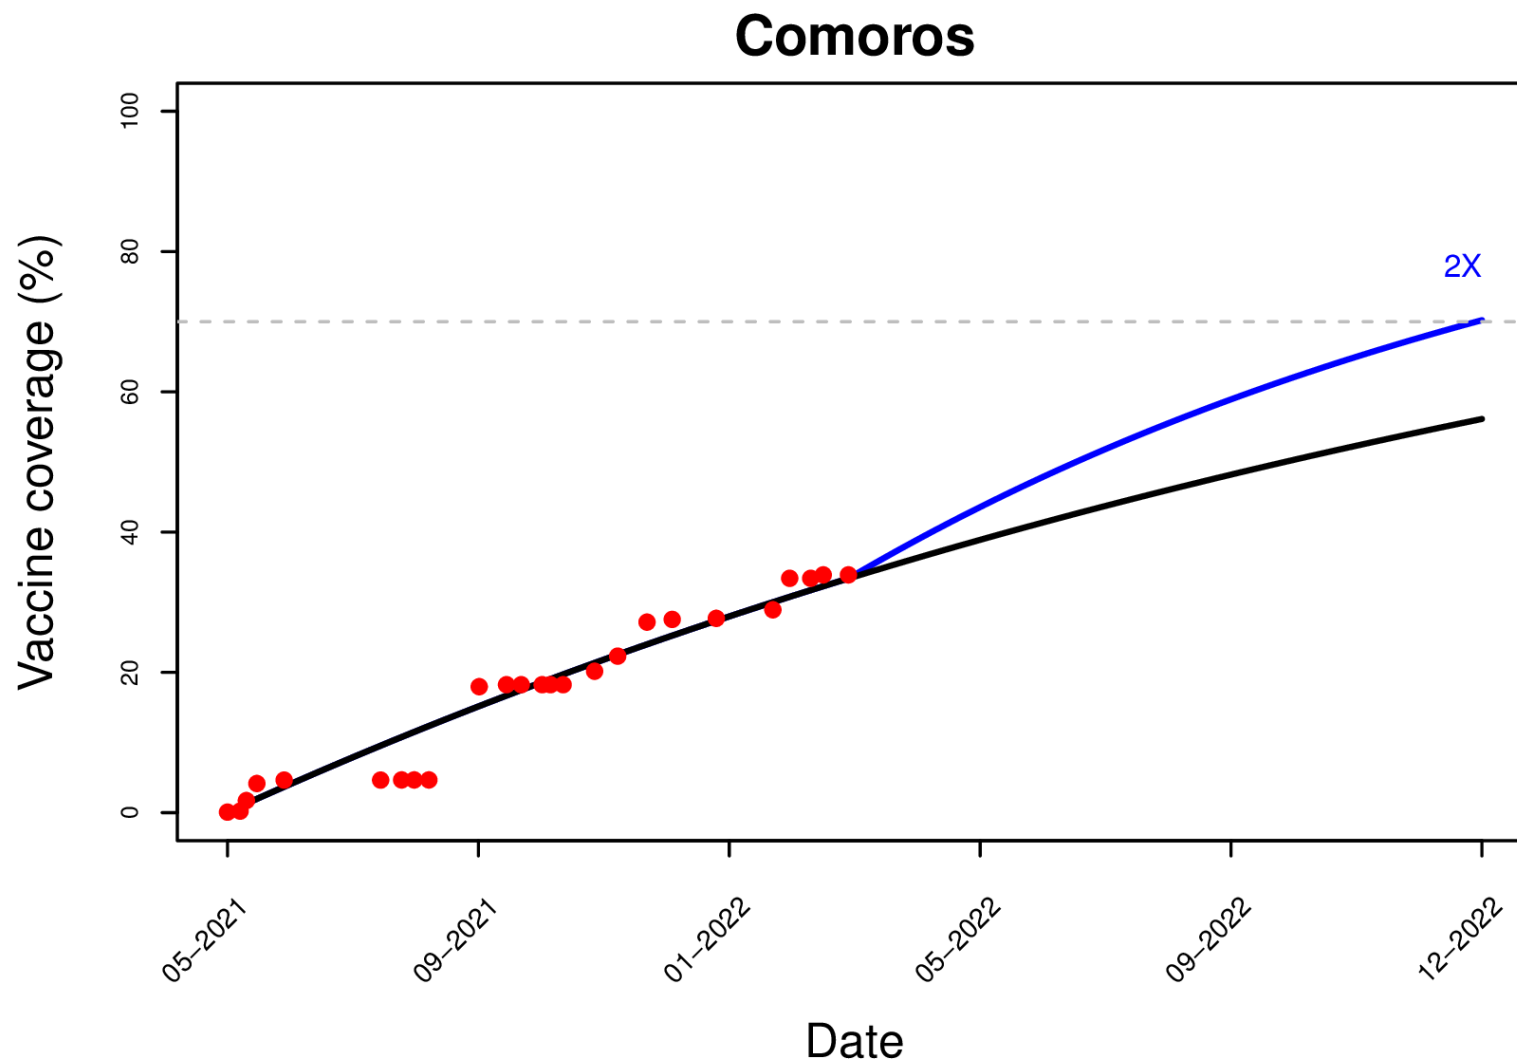

**Supplementary Figure S9:** Graphs showing model vaccination coverage trends from the model (black line) and vaccination coverage data (red dots). The blue lines show vaccine coverage trends when vaccination rates are increased (from current rates) to reach 70% by end of December 2022. Grey dashed lines indicate the 70% coverage target. The numbers show how much vaccination coverage rate should be increased by to reach that target

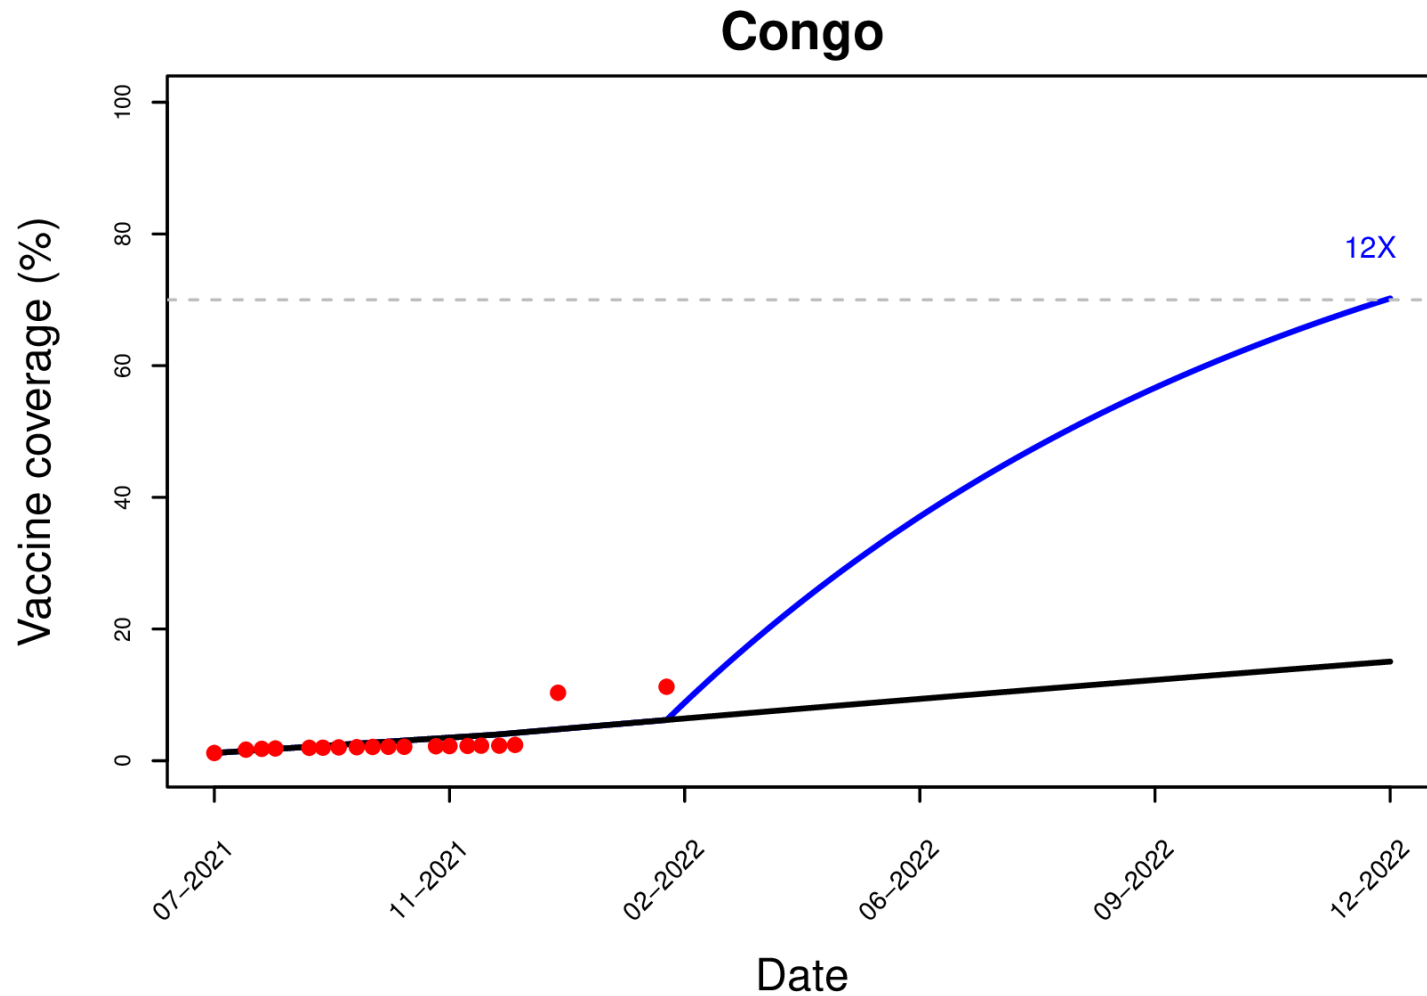

**Supplementary Figure S10:** Graphs showing model vaccination coverage trends from the model (black line) and vaccination coverage data (red dots). The blue lines show vaccine coverage trends when vaccination rates are increased (from current rates) to reach 70% by end of December 2022. Grey dashed lines indicate the 70% coverage target. The numbers show how much vaccination coverage rate should be increased by to reach that target

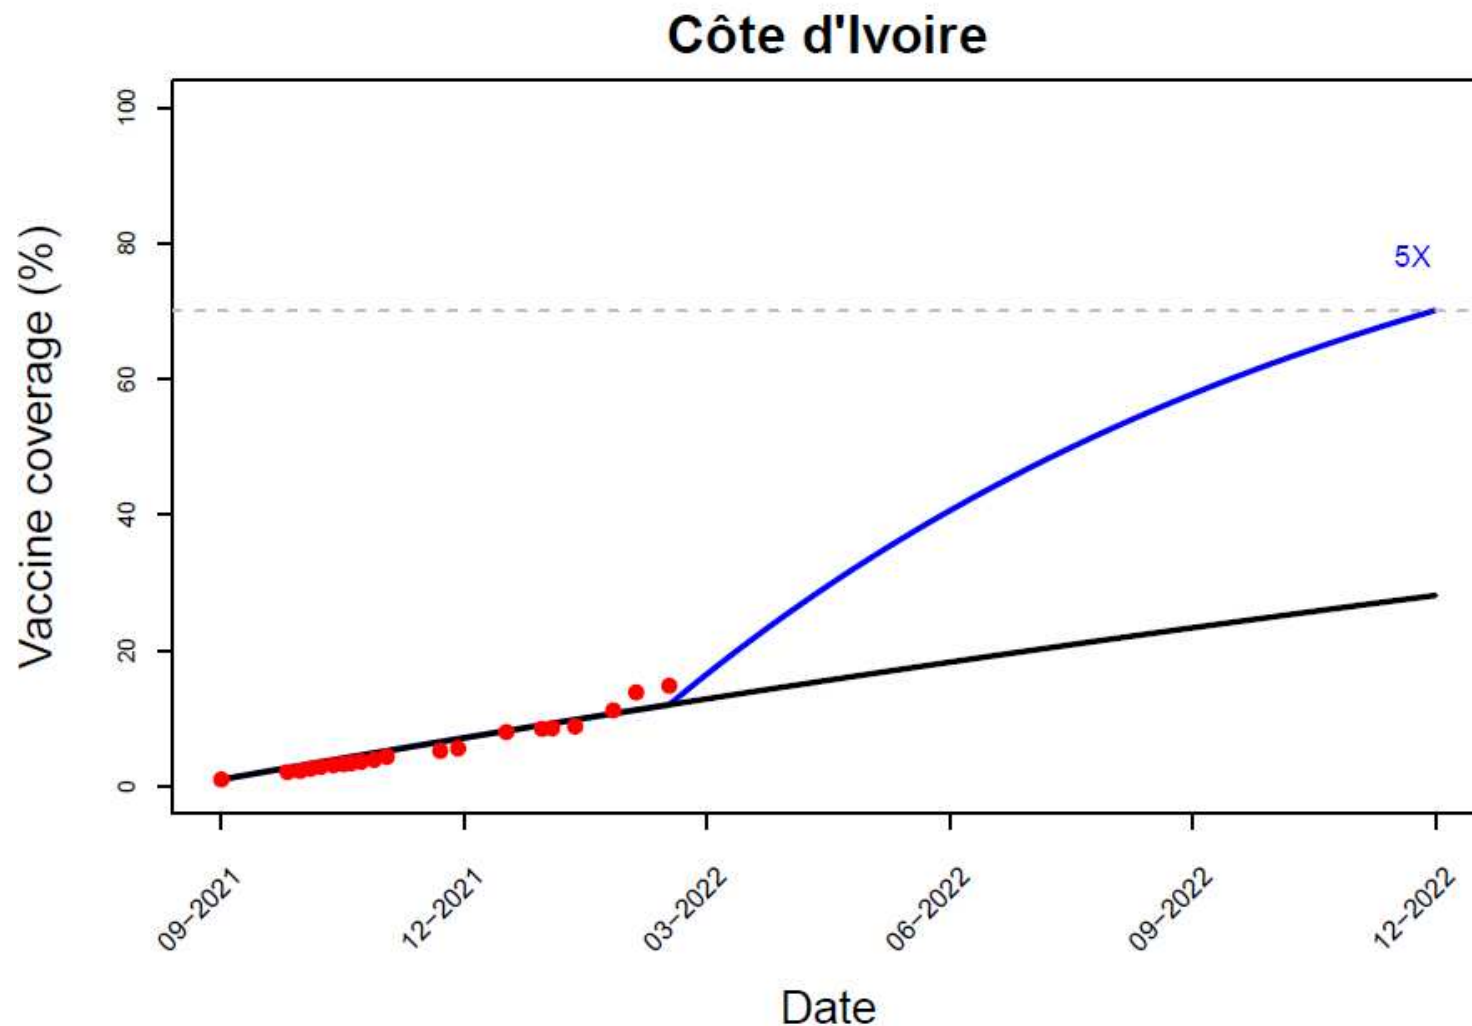

**Supplementary Figure S11:** Graphs showing model vaccination coverage trends from the model (black line) and vaccination coverage data (red dots). The blue lines show vaccine coverage trends when vaccination rates are increased (from current rates) to reach 70% by end of December 2022. Grey dashed lines indicate the 70% coverage target. The numbers show how much vaccination coverage rate should be increased by to reach that target

## Democratic Republic of the Congo

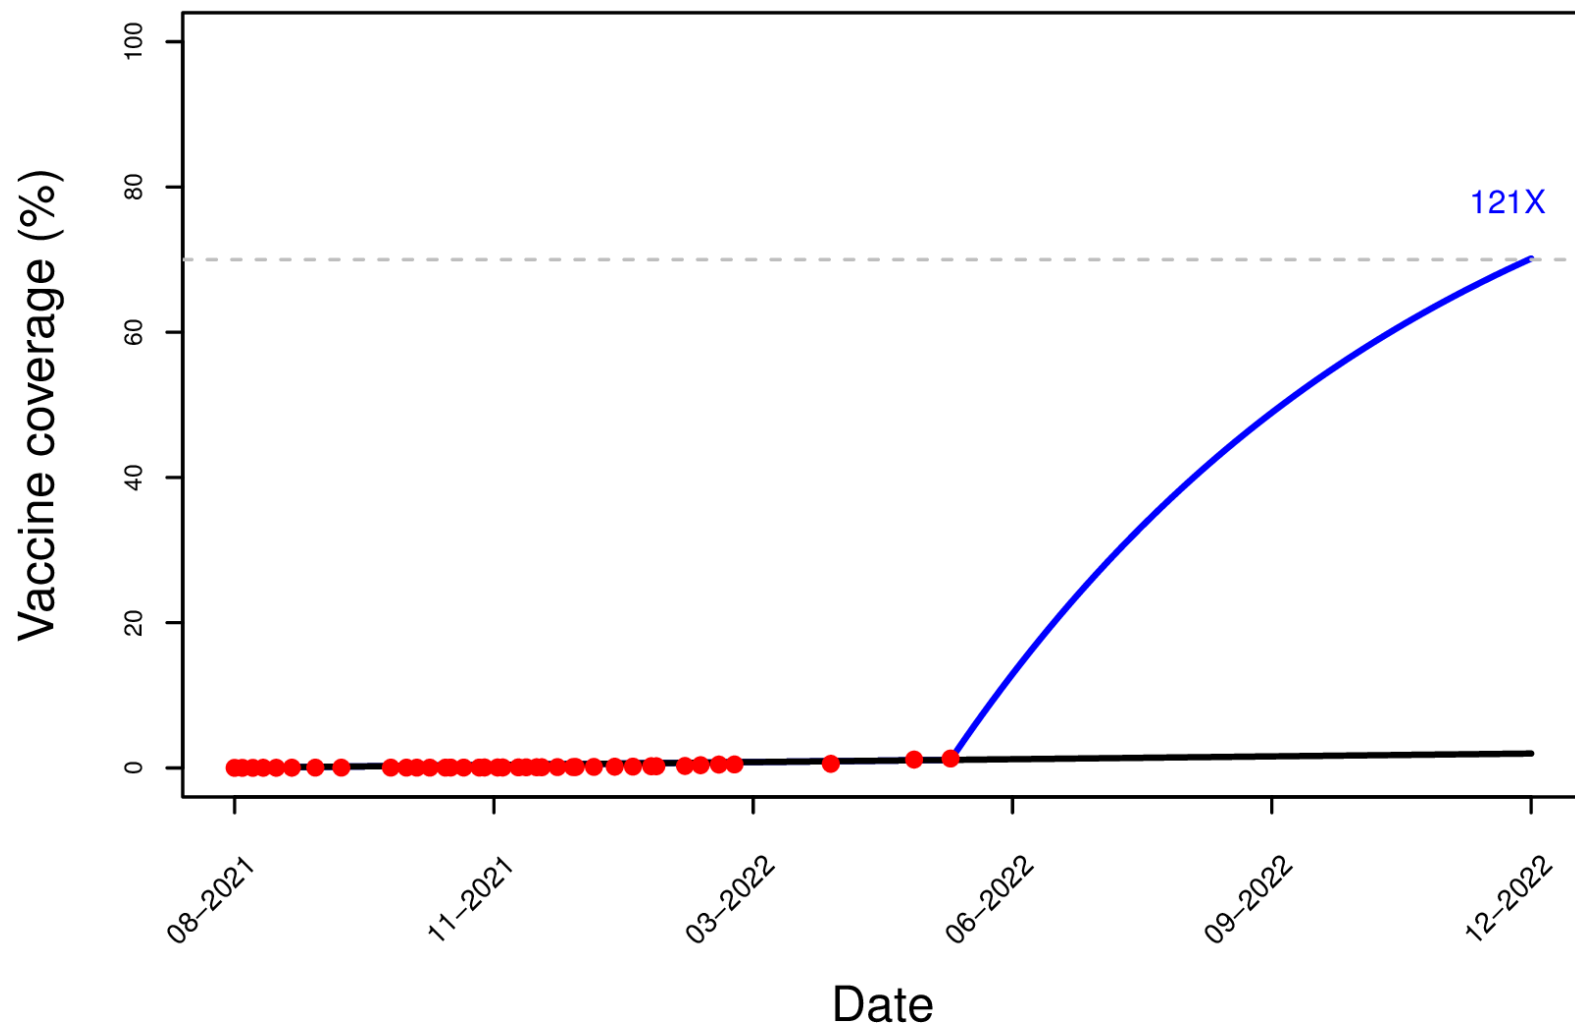

**Supplementary Figure S12:** Graphs showing model vaccination coverage trends from the model (black line) and vaccination coverage data (red dots). The blue lines show vaccine coverage trends when vaccination rates are increased (from current rates) to reach 70% by end of December 2022. Grey dashed lines indicate the 70% coverage target. The numbers show how much vaccination coverage rate should be increased by to reach that target



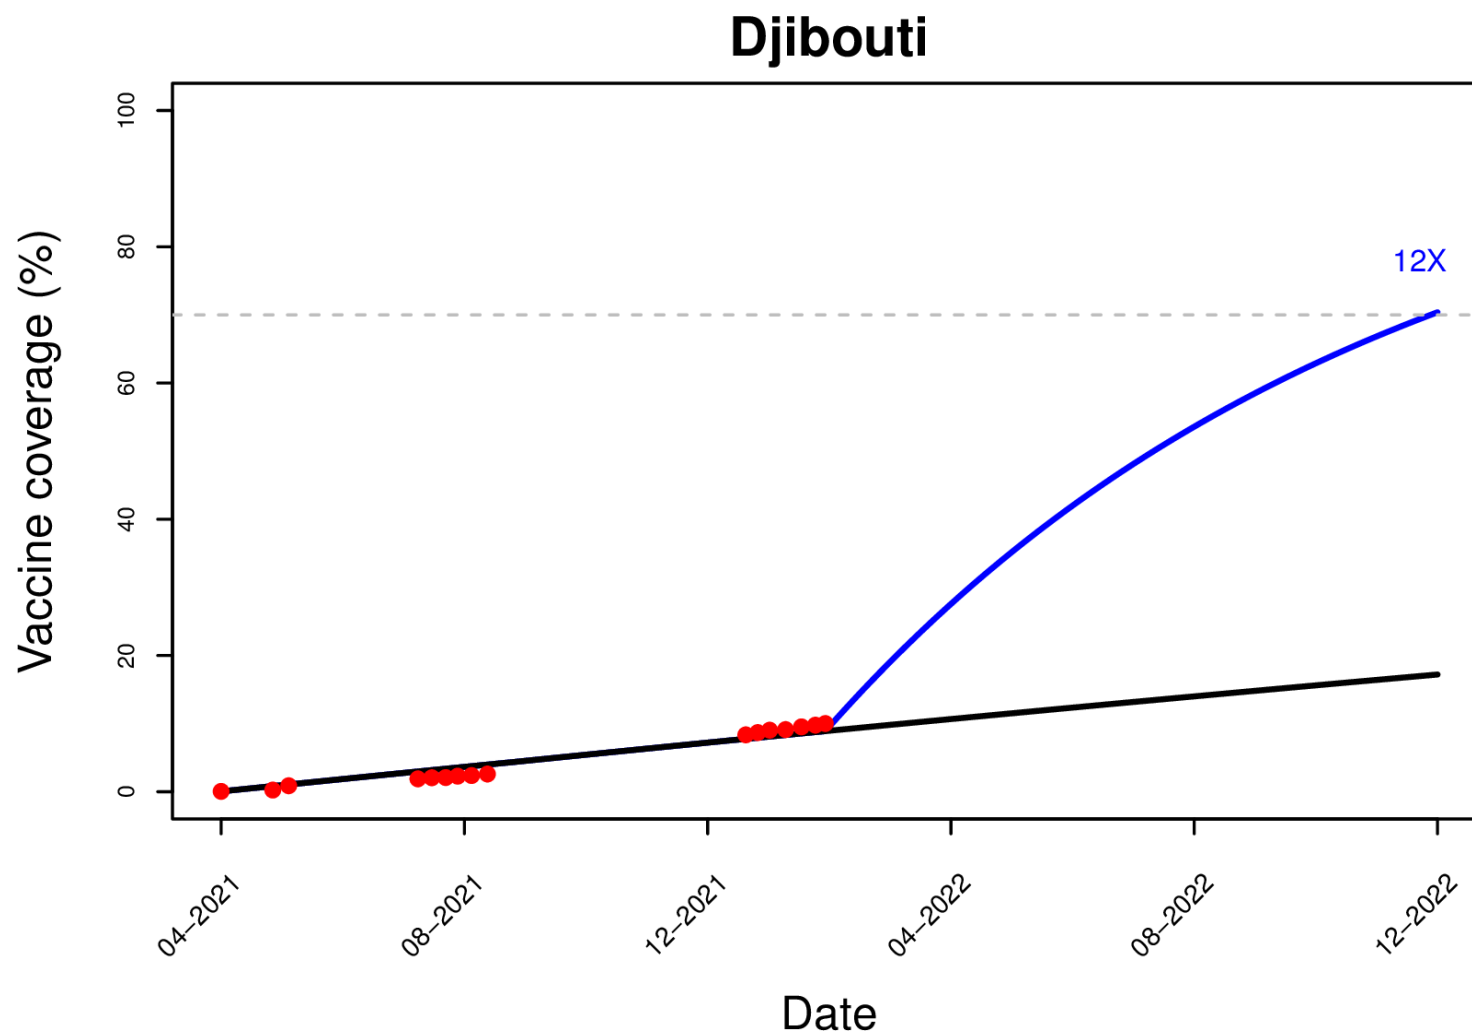

**Supplementary Figure S13:** Graphs showing model vaccination coverage trends from the model (black line) and vaccination coverage data (red dots). The blue lines show vaccine coverage trends when vaccination rates are increased (from current rates) to reach 70% by end of December 2022. Grey dashed lines indicate the 70% coverage target. The numbers show how much vaccination coverage rate should be increased by to reach that target

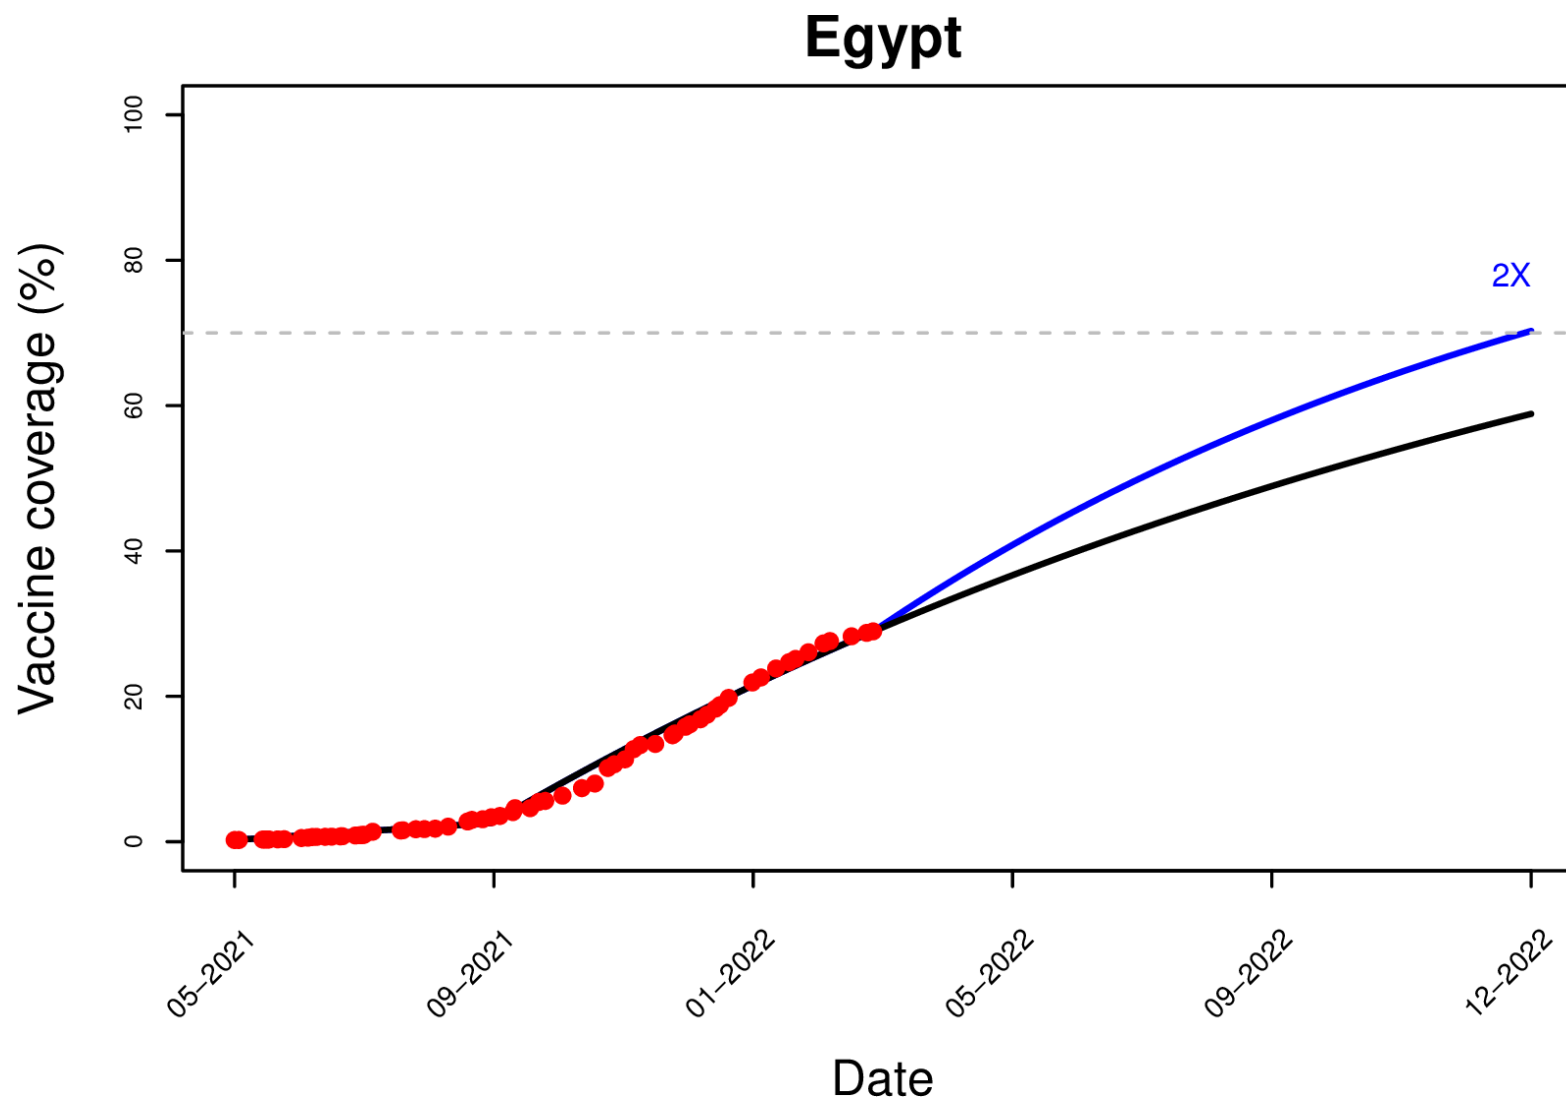

**Supplementary Figure S14:** Graphs showing model vaccination coverage trends from the model (black line) and vaccination coverage data (red dots). The blue lines show vaccine coverage trends when vaccination rates are increased (from current rates) to reach 70% by end of December 2022. Grey dashed lines indicate the 70% coverage target. The numbers show how much vaccination coverage rate should be increased by to reach that target

## Equatorial Guinea

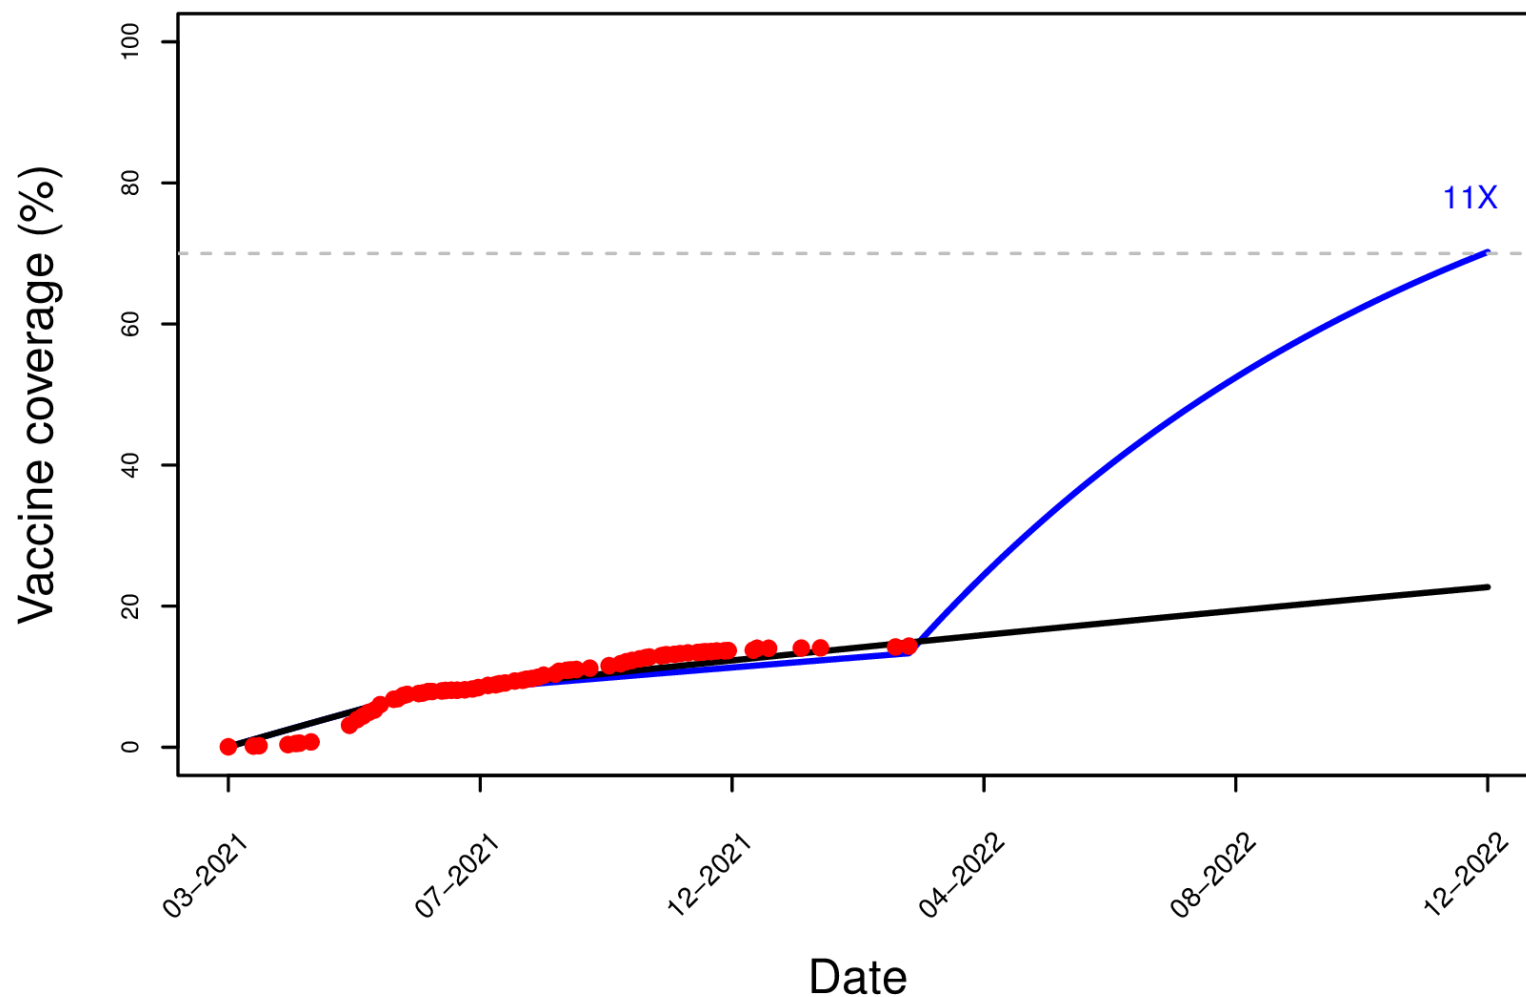

**Supplementary Figure S15:** Graphs showing model vaccination coverage trends from the model (black line) and vaccination coverage data (red dots). The blue lines show vaccine coverage trends when vaccination rates are increased (from current rates) to reach 70% by end of December 2022. Grey dashed lines indicate the 70% coverage target. The numbers show how much vaccination coverage rate should be increased by to reach that target

## Eswatini (Swaziland)

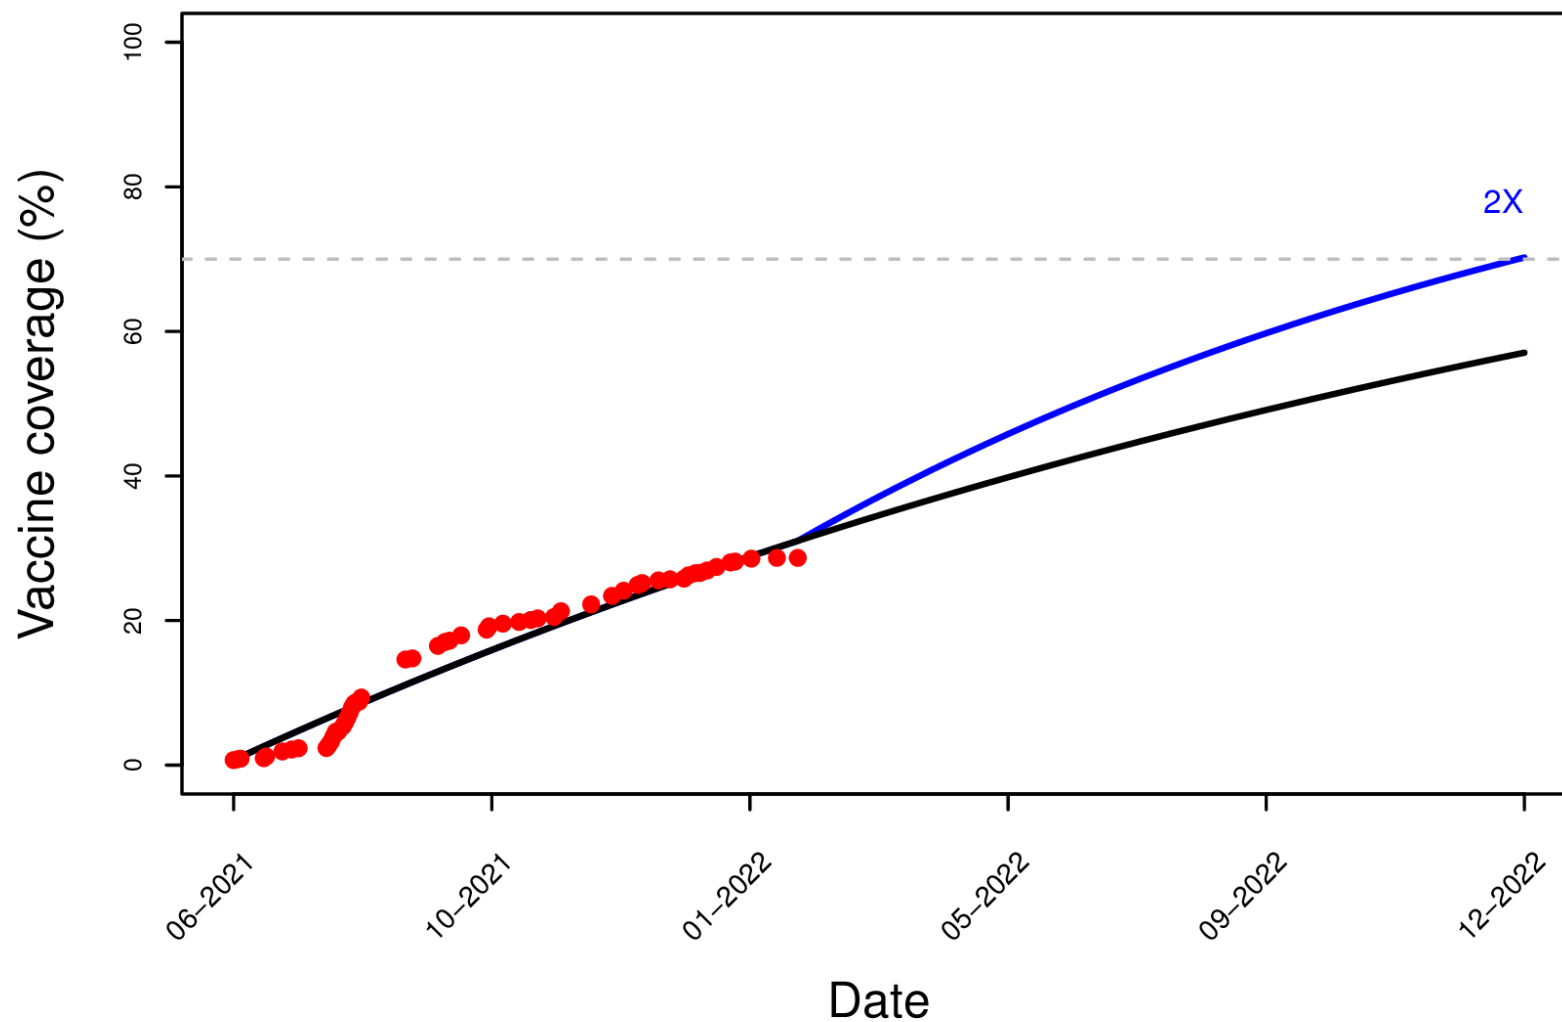

**Supplementary Figure S16:** Graphs showing model vaccination coverage trends from the model (black line) and vaccination coverage data (red dots). The blue lines show vaccine coverage trends when vaccination rates are increased (from current rates) to reach 70% by end of December 2022. Grey dashed lines indicate the 70% coverage target. The numbers show how much vaccination coverage rate should be increased by to reach that target

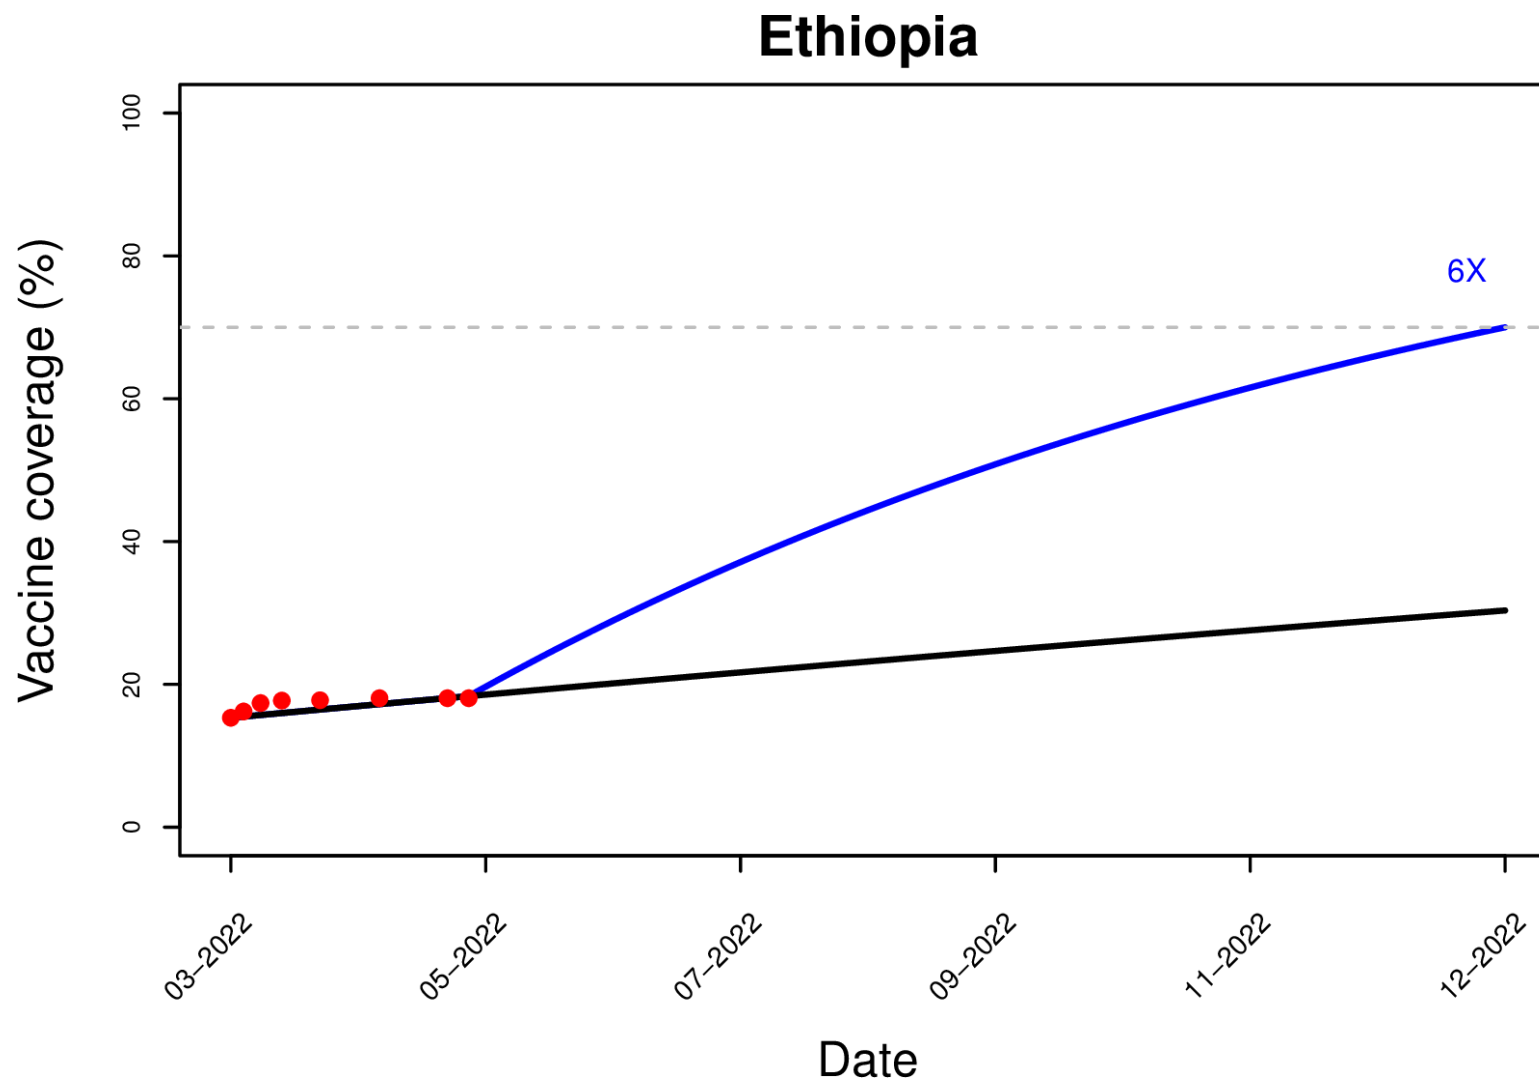

**Supplementary Figure S17:** Graphs showing model vaccination coverage trends from the model (black line) and vaccination coverage data (red dots). The blue lines show vaccine coverage trends when vaccination rates are increased (from current rates) to reach 70% by end of December 2022. Grey dashed lines indicate the 70% coverage target. The numbers show how much vaccination coverage rate should be increased by to reach that target

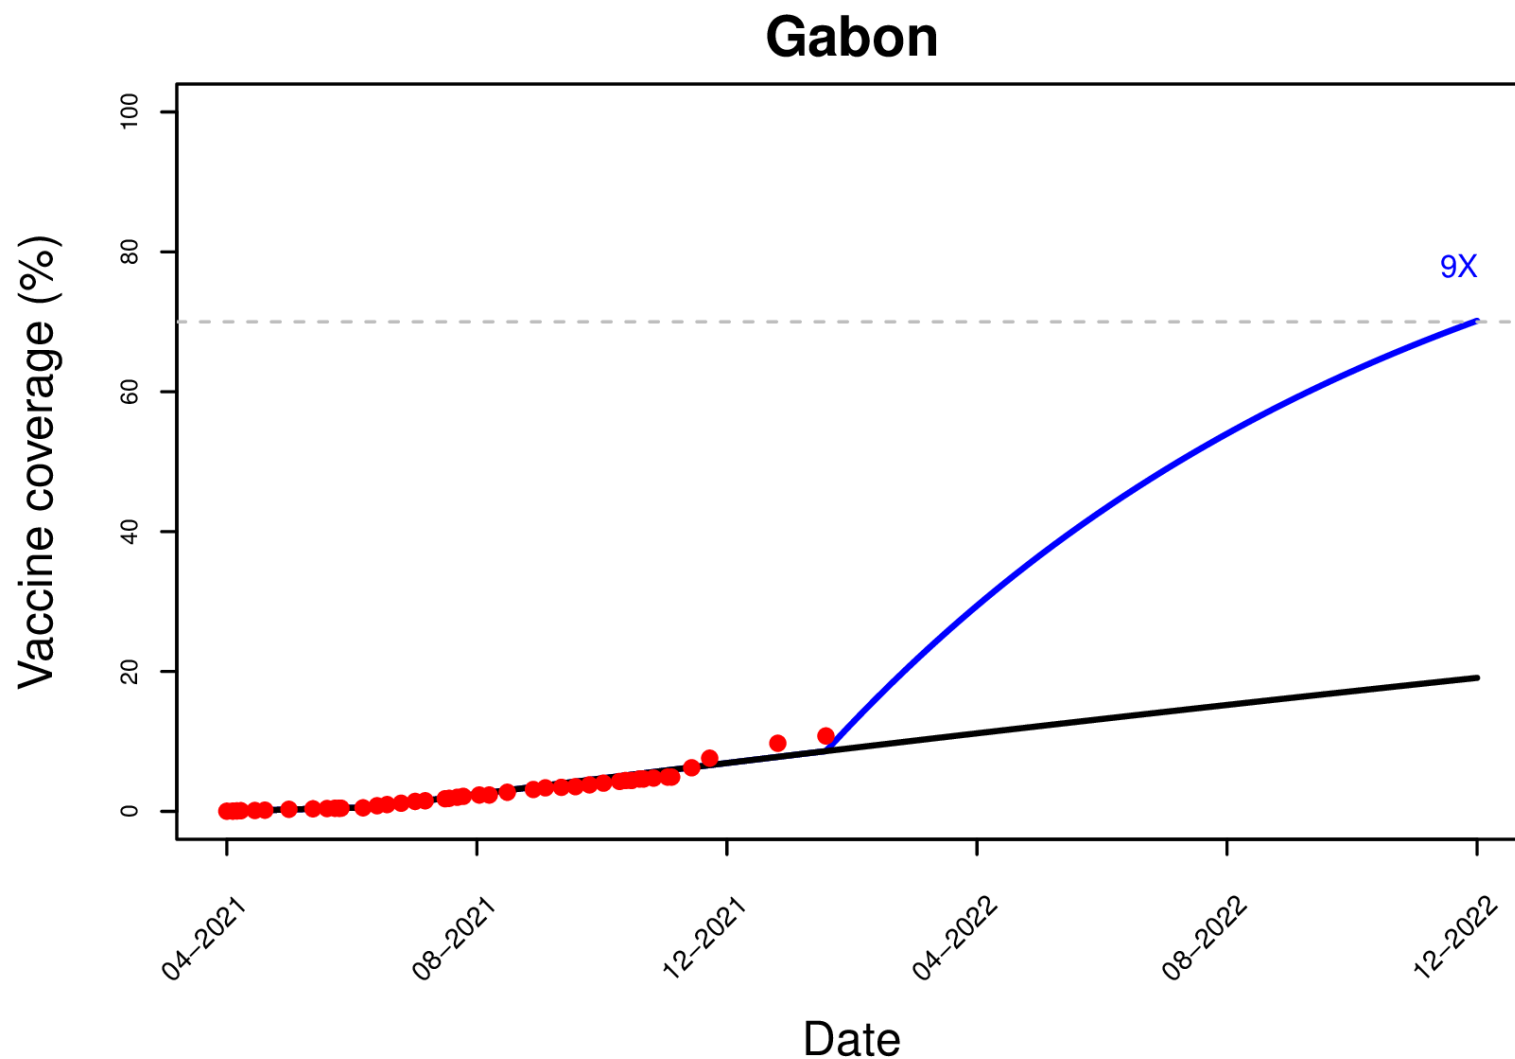

**Supplementary Figure S18:** Graphs showing model vaccination coverage trends from the model (black line) and vaccination coverage data (red dots). The blue lines show vaccine coverage trends when vaccination rates are increased (from current rates) to reach 70% by end of December 2022. Grey dashed lines indicate the 70% coverage target. The numbers show how much vaccination coverage rate should be increased by to reach that target

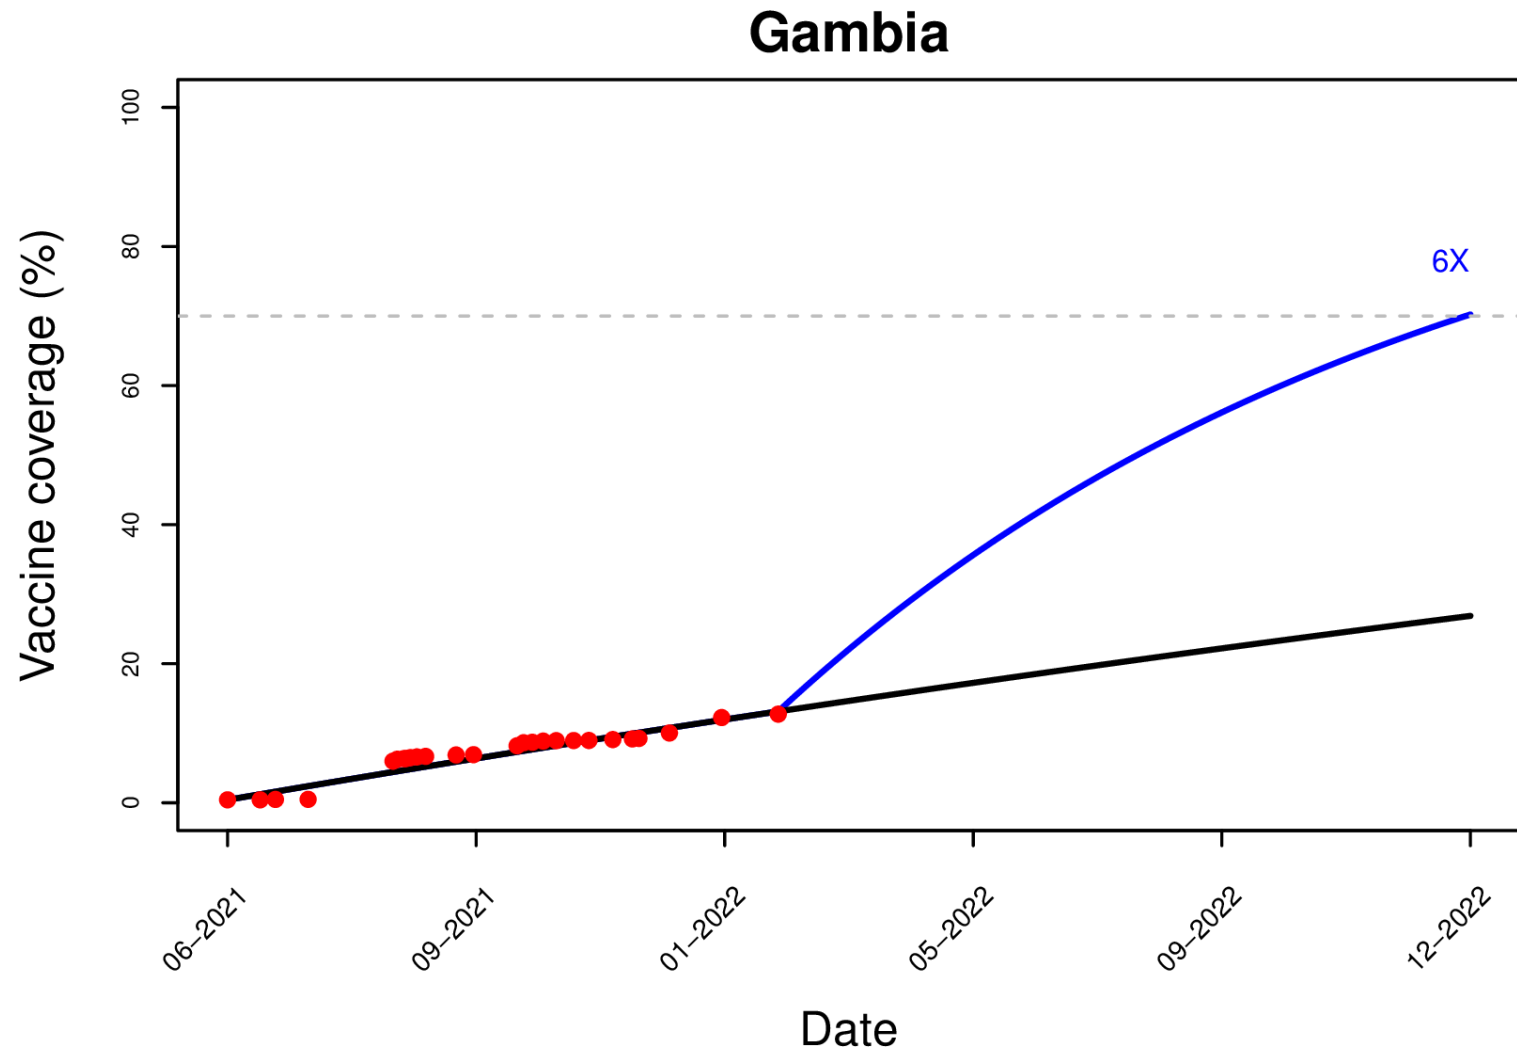

**Supplementary Figure S19:** Graphs showing model vaccination coverage trends from the model (black line) and vaccination coverage data (red dots). The blue lines show vaccine coverage trends when vaccination rates are increased (from current rates) to reach 70% by end of December 2022. Grey dashed lines indicate the 70% coverage target. The numbers show how much vaccination coverage rate should be increased by to reach that target

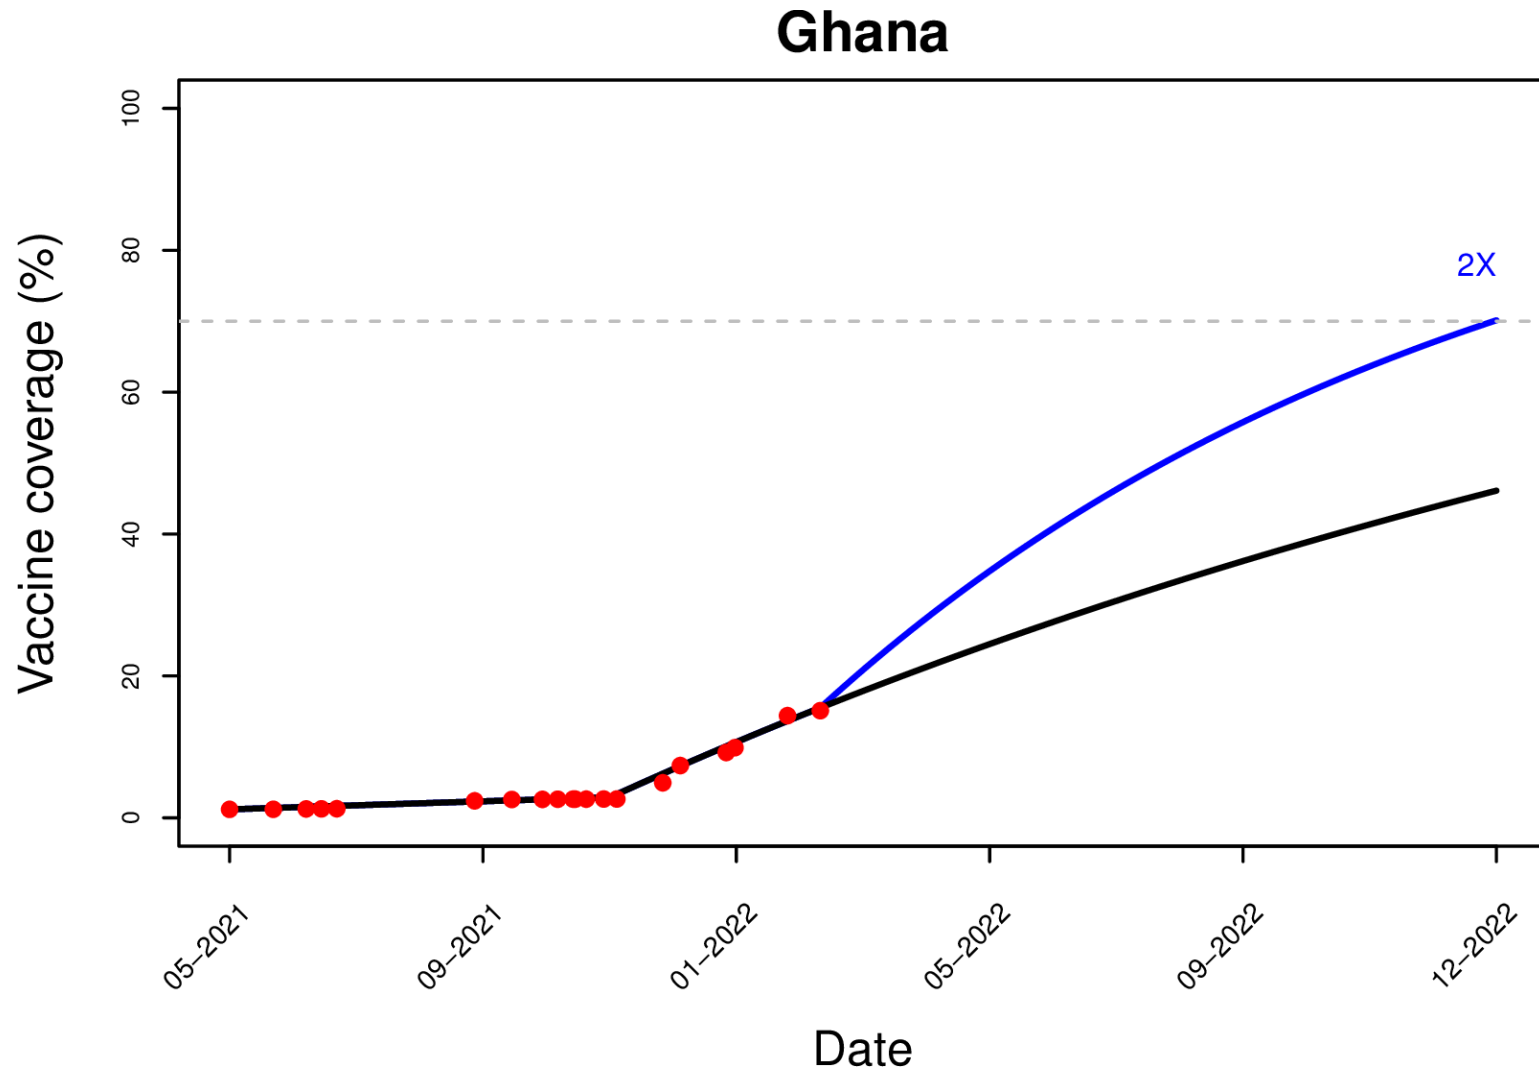

**Supplementary Figure S20:** Graphs showing model vaccination coverage trends from the model (black line) and vaccination coverage data (red dots). The blue lines show vaccine coverage trends when vaccination rates are increased (from current rates) to reach 70% by end of December 2022. Grey dashed lines indicate the 70% coverage target. The numbers show how much vaccination coverage rate should be increased by to reach that target



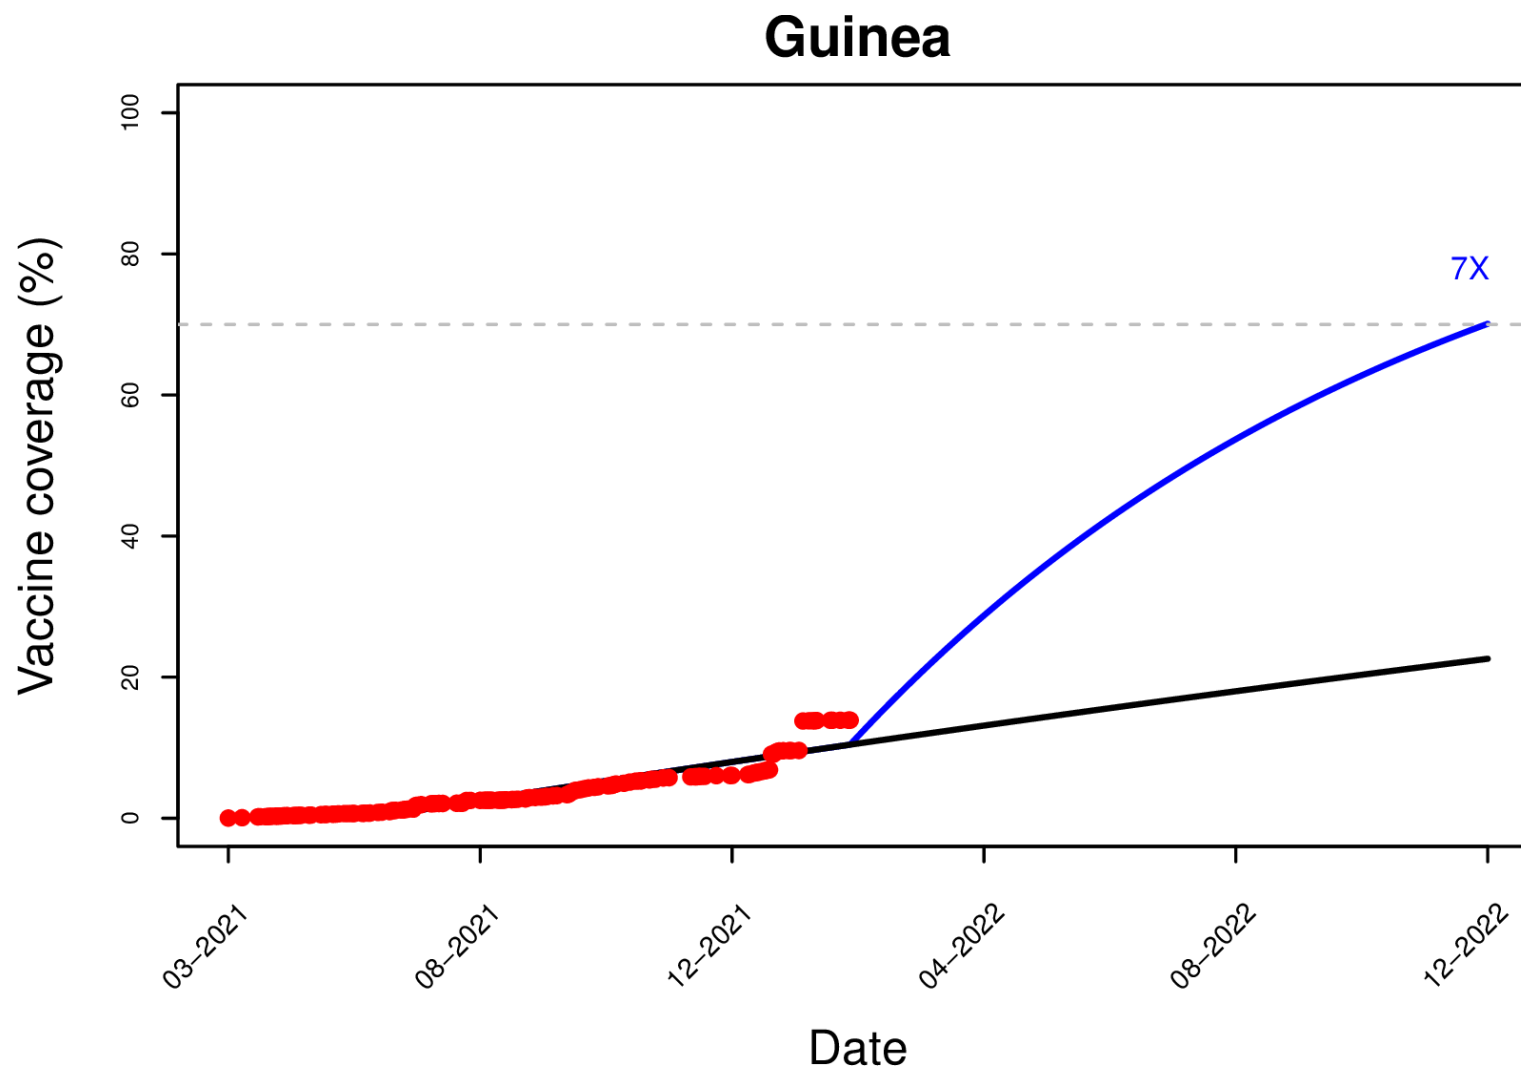

**Supplementary Figure S21:** Graphs showing model vaccination coverage trends from the model (black line) and vaccination coverage data (red dots). The blue lines show vaccine coverage trends when vaccination rates are increased (from current rates) to reach 70% by end of December 2022. Grey dashed lines indicate the 70% coverage target. The numbers show how much vaccination coverage rate should be increased by to reach that target

## Guinea-Bissau

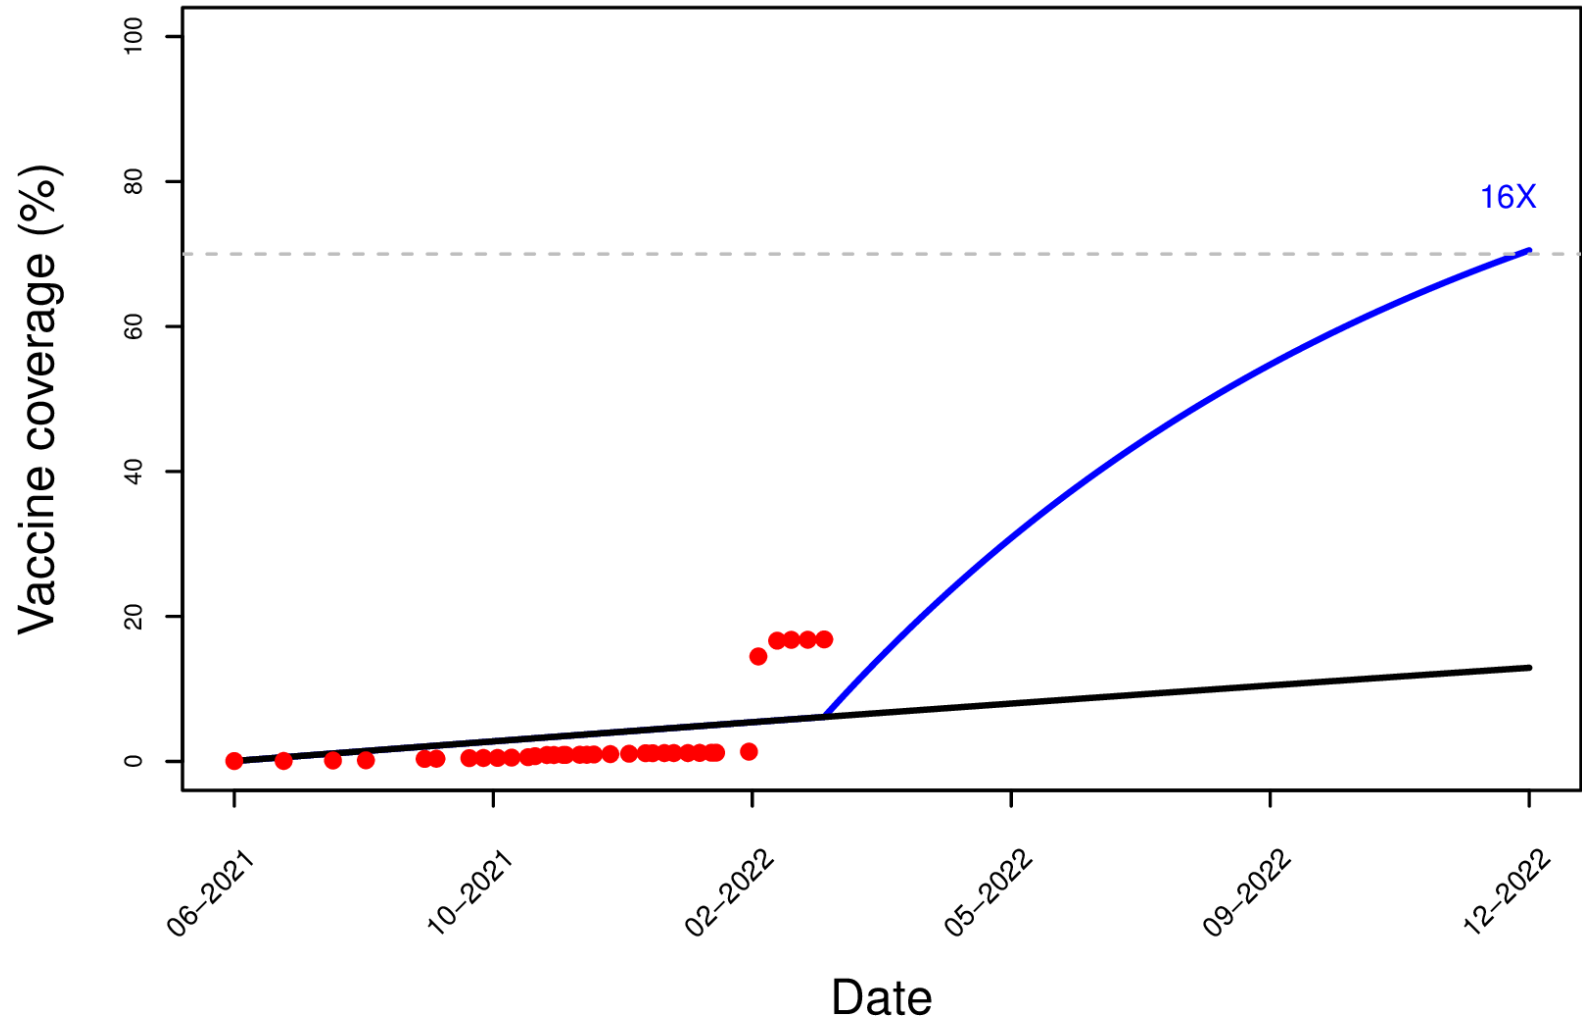

**Supplementary Figure S22:** Graphs showing model vaccination coverage trends from the model (black line) and vaccination coverage data (red dots). The blue lines show vaccine coverage trends when vaccination rates are increased (from current rates) to reach 70% by end of December 2022. Grey dashed lines indicate the 70% coverage target. The numbers show how much vaccination coverage rate should be increased by to reach that target

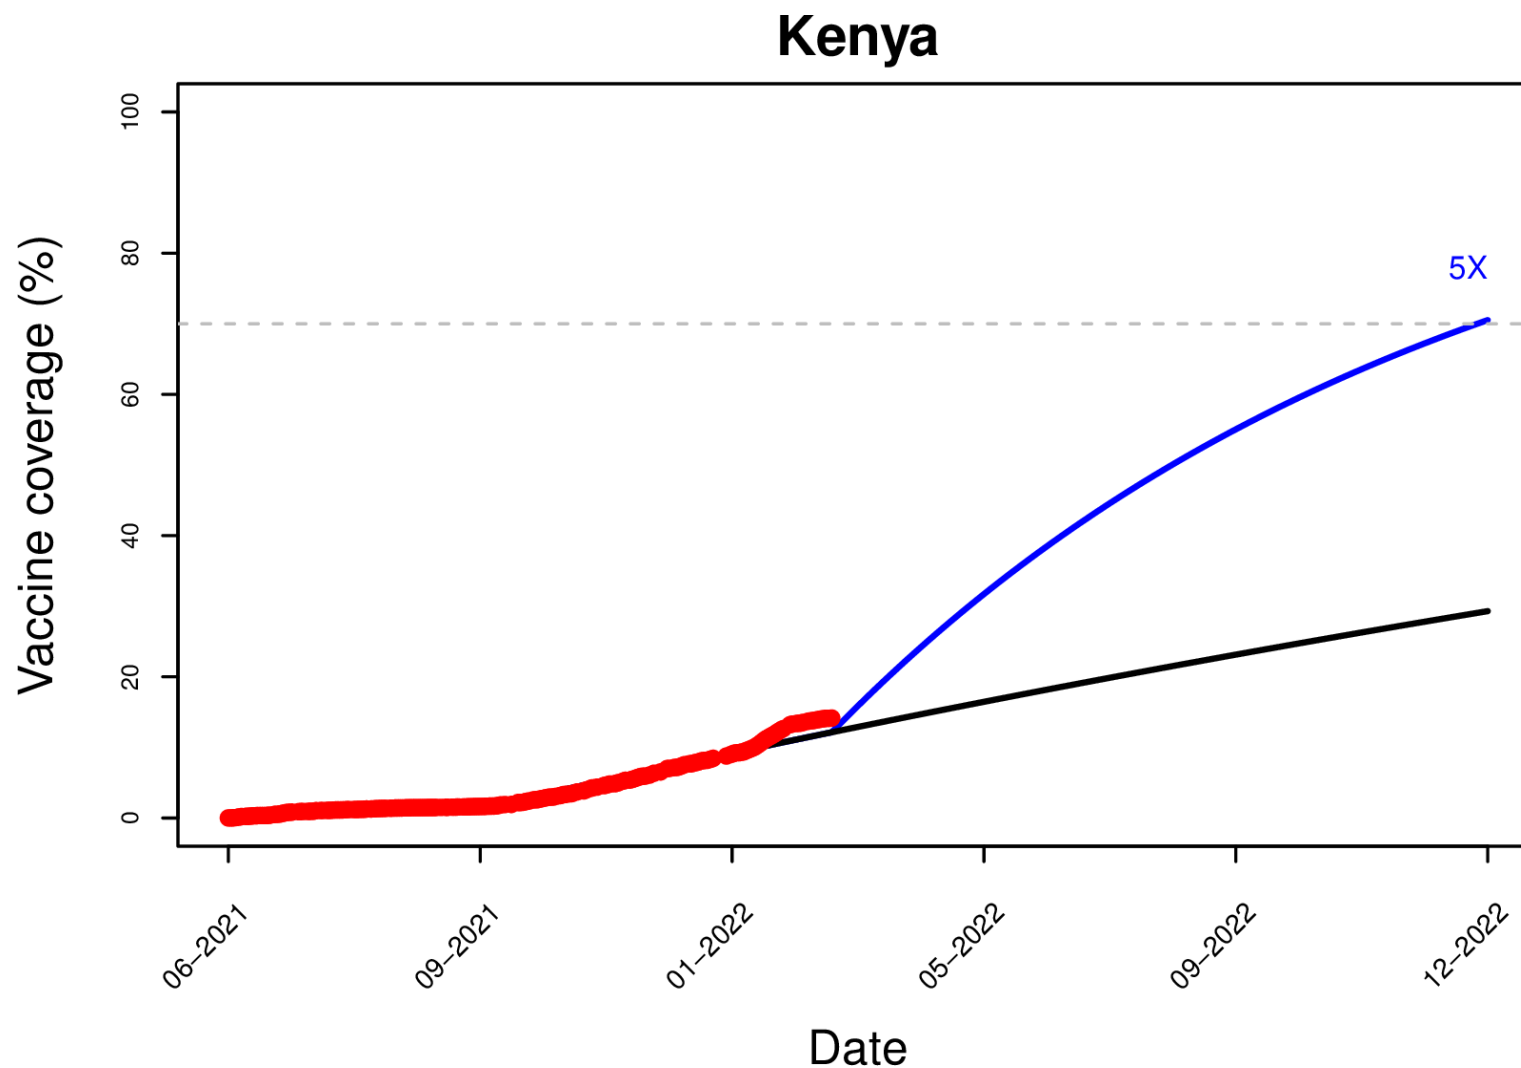

**Supplementary Figure S23:** Graphs showing model vaccination coverage trends from the model (black line) and vaccination coverage data (red dots). The blue lines show vaccine coverage trends when vaccination rates are increased (from current rates) to reach 70% by end of December 2022. Grey dashed lines indicate the 70% coverage target. The numbers show how much vaccination coverage rate should be increased by to reach that target

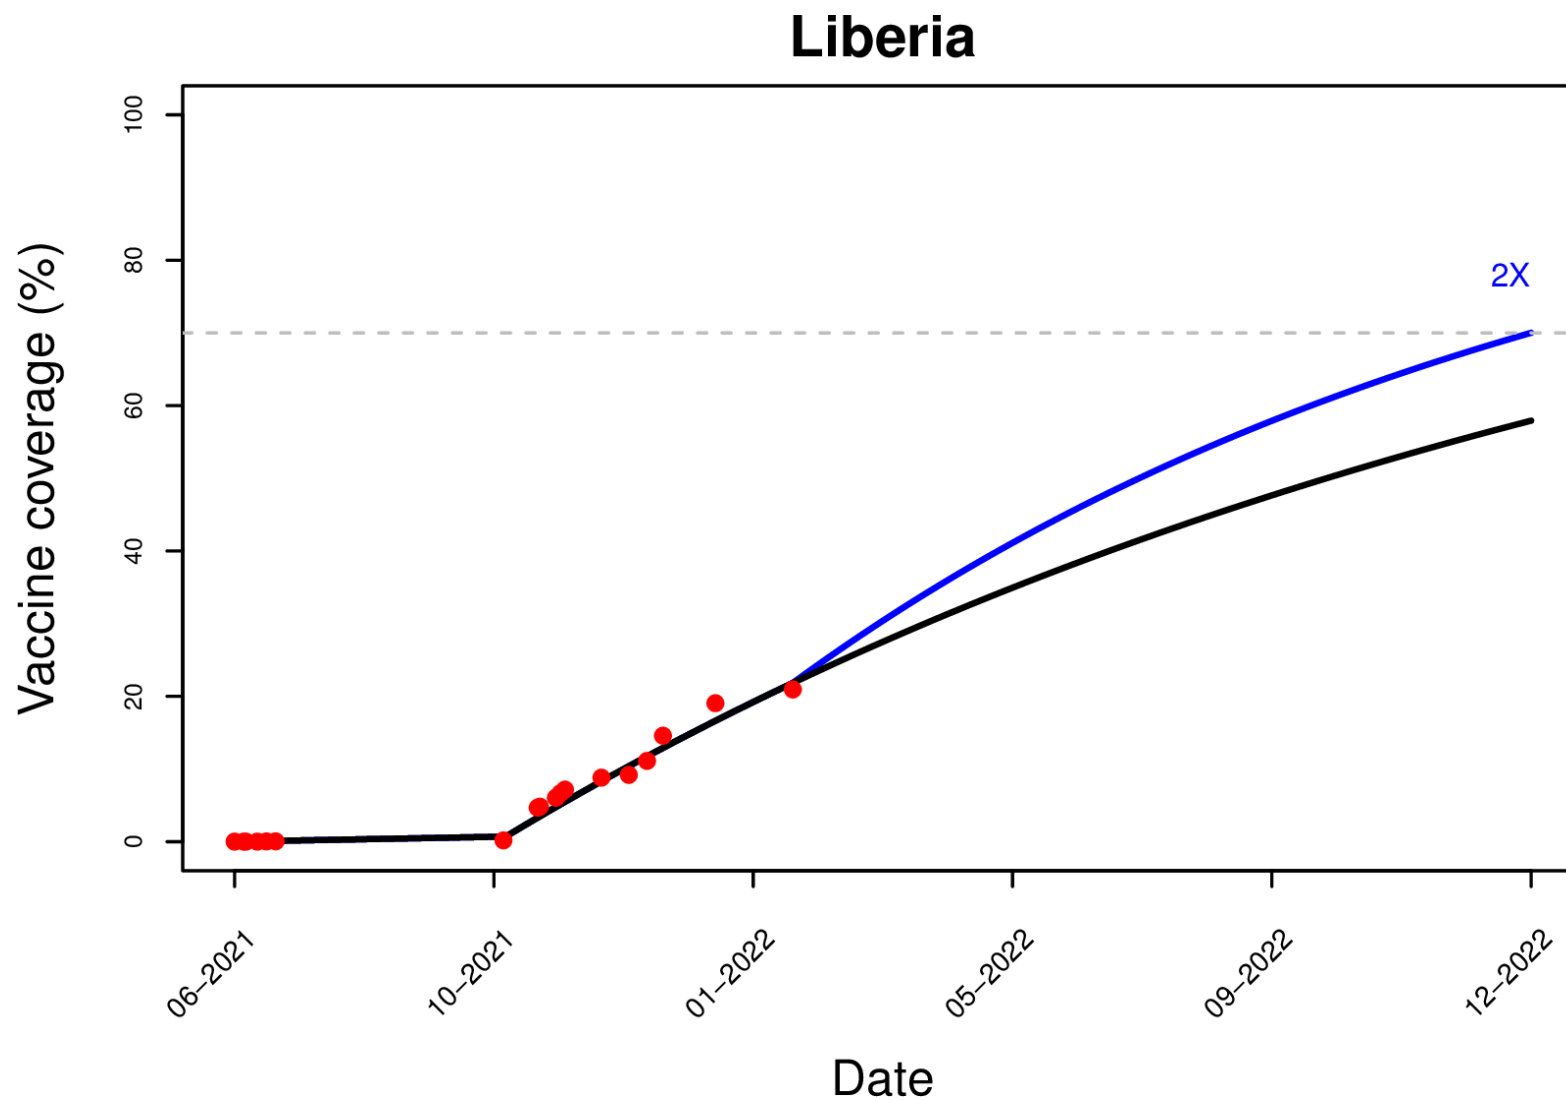

**Supplementary Figure S24:** Graphs showing model vaccination coverage trends from the model (black line) and vaccination coverage data (red dots). The blue lines show vaccine coverage trends when vaccination rates are increased (from current rates) to reach 70% by end of December 2022. Grey dashed lines indicate the 70% coverage target. The numbers show how much vaccination coverage rate should be increased by to reach that target

## Madagascar

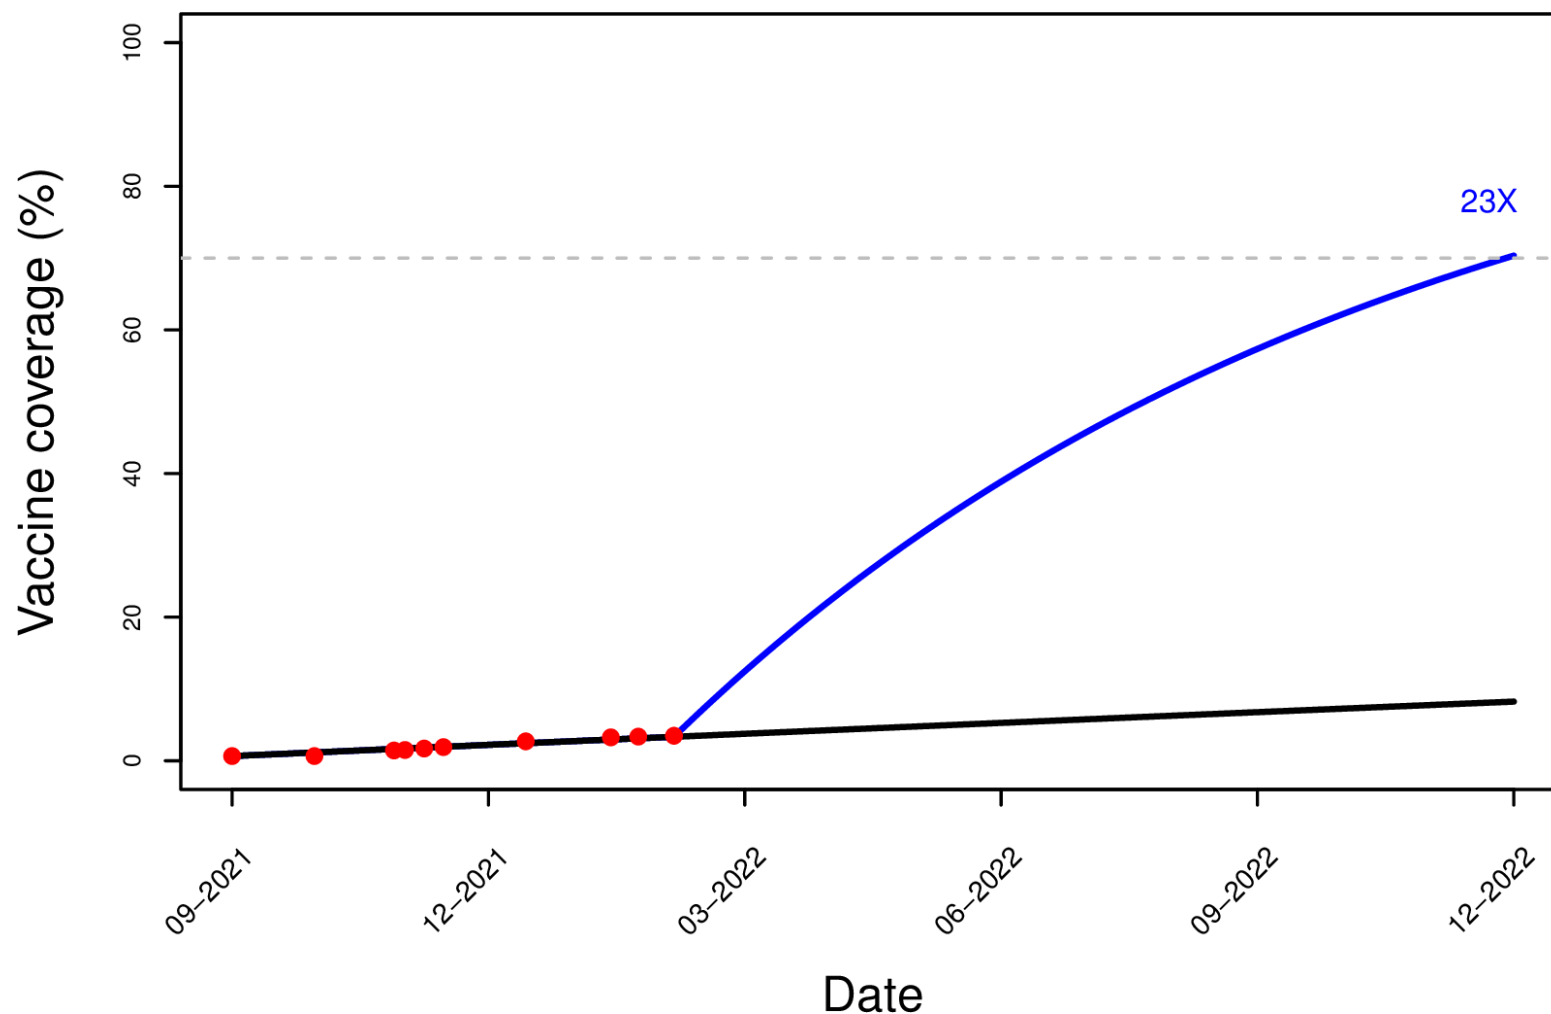

**Supplementary Figure S25:** Graphs showing model vaccination coverage trends from the model (black line) and vaccination coverage data (red dots). The blue lines show vaccine coverage trends when vaccination rates are increased (from current rates) to reach 70% by end of December 2022. Grey dashed lines indicate the 70% coverage target. The numbers show how much vaccination coverage rate should be increased by to reach that target

## Malawi

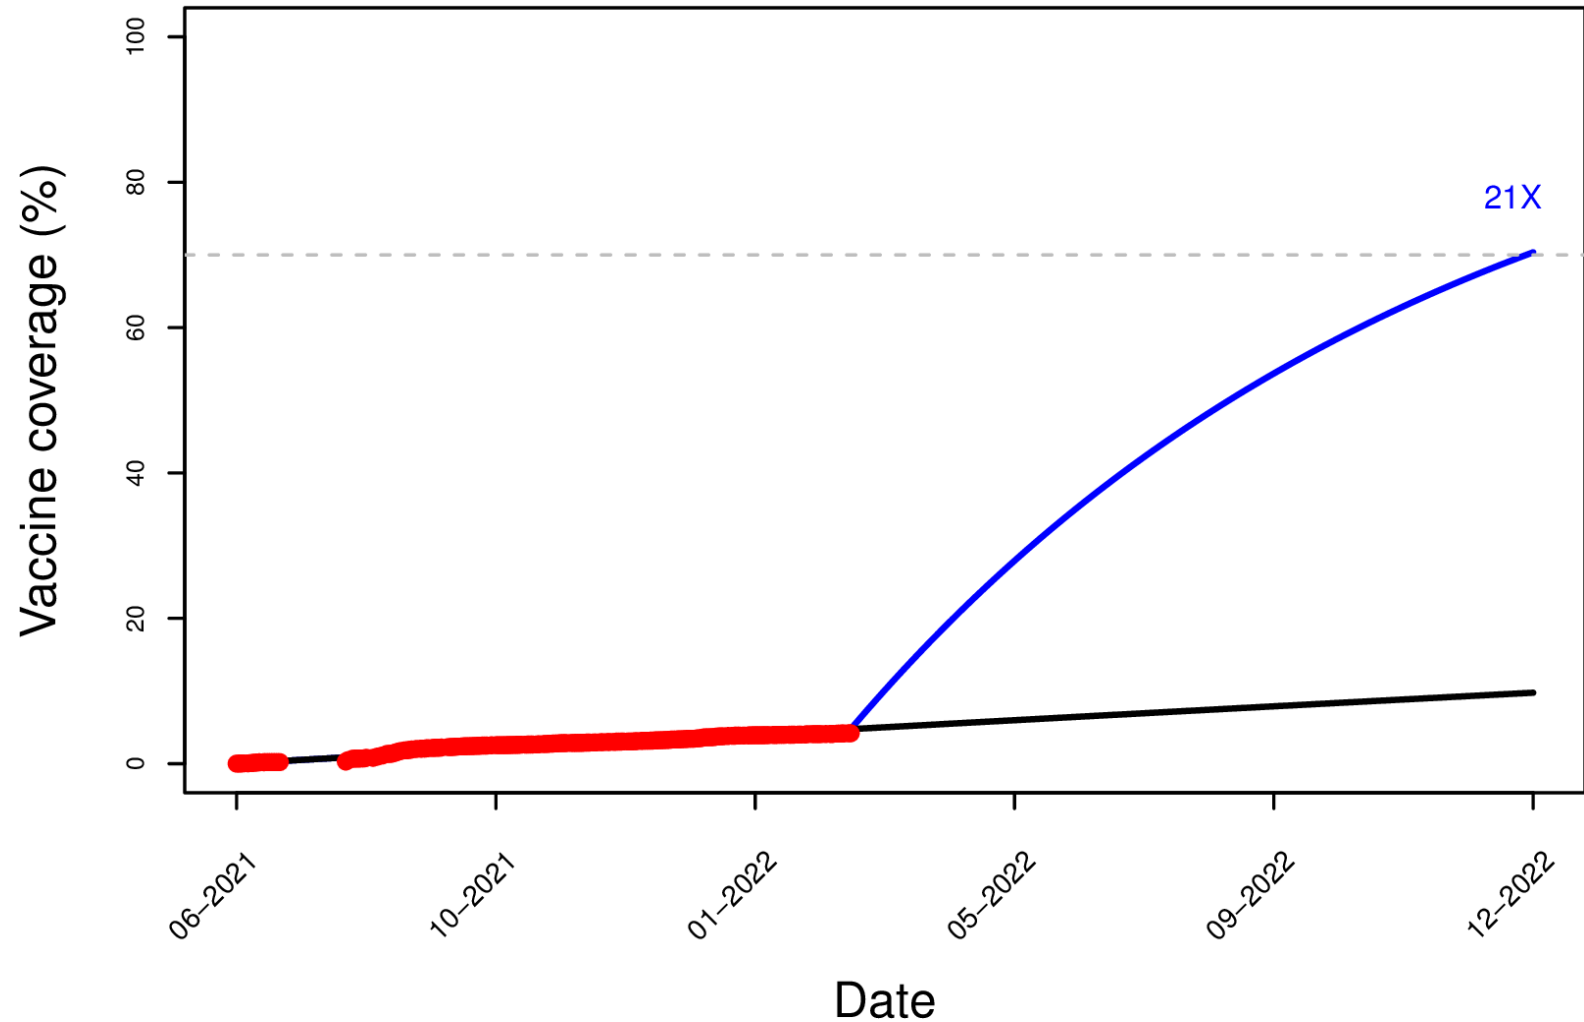

**Supplementary Figure S26:** Graphs showing model vaccination coverage trends from the model (black line) and vaccination coverage data (red dots). The blue lines show vaccine coverage trends when vaccination rates are increased (from current rates) to reach 70% by end of December 2022. Grey dashed lines indicate the 70% coverage target. The numbers show how much vaccination coverage rate should be increased by to reach that target

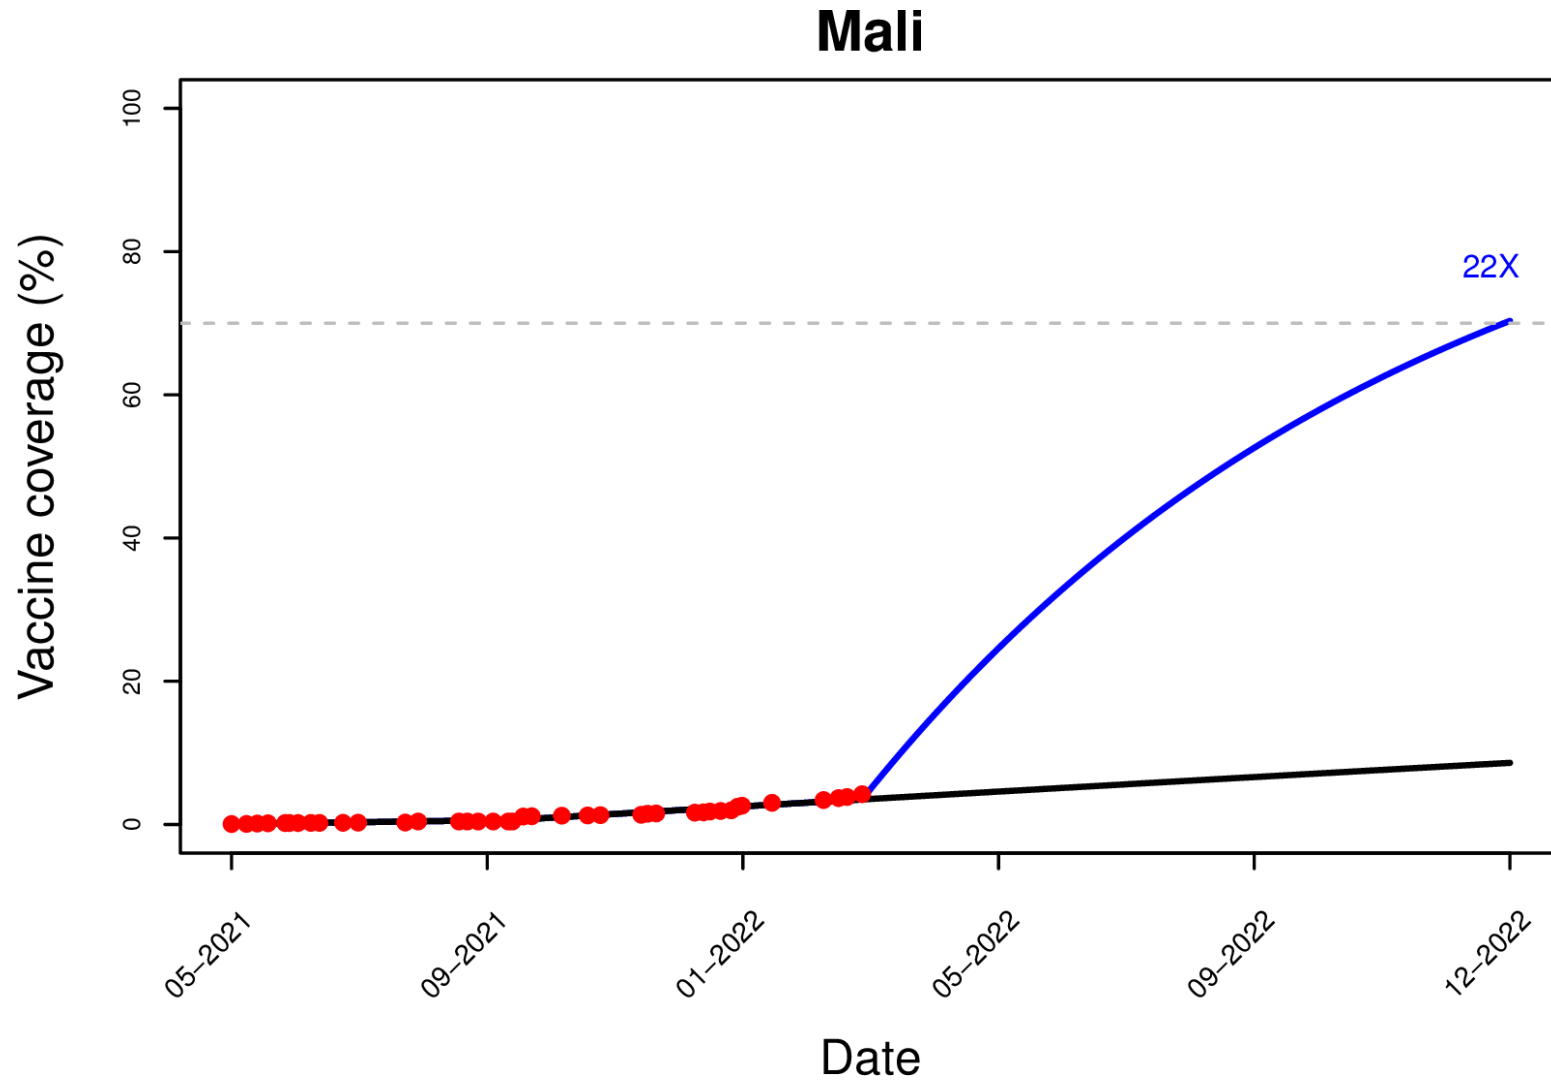

**Supplementary Figure S27:** Graphs showing model vaccination coverage trends from the model (black line) and vaccination coverage data (red dots). The blue lines show vaccine coverage trends when vaccination rates are increased (from current rates) to reach 70% by end of December 2022. Grey dashed lines indicate the 70% coverage target. The numbers show how much vaccination coverage rate should be increased by to reach that target

## Mauritania

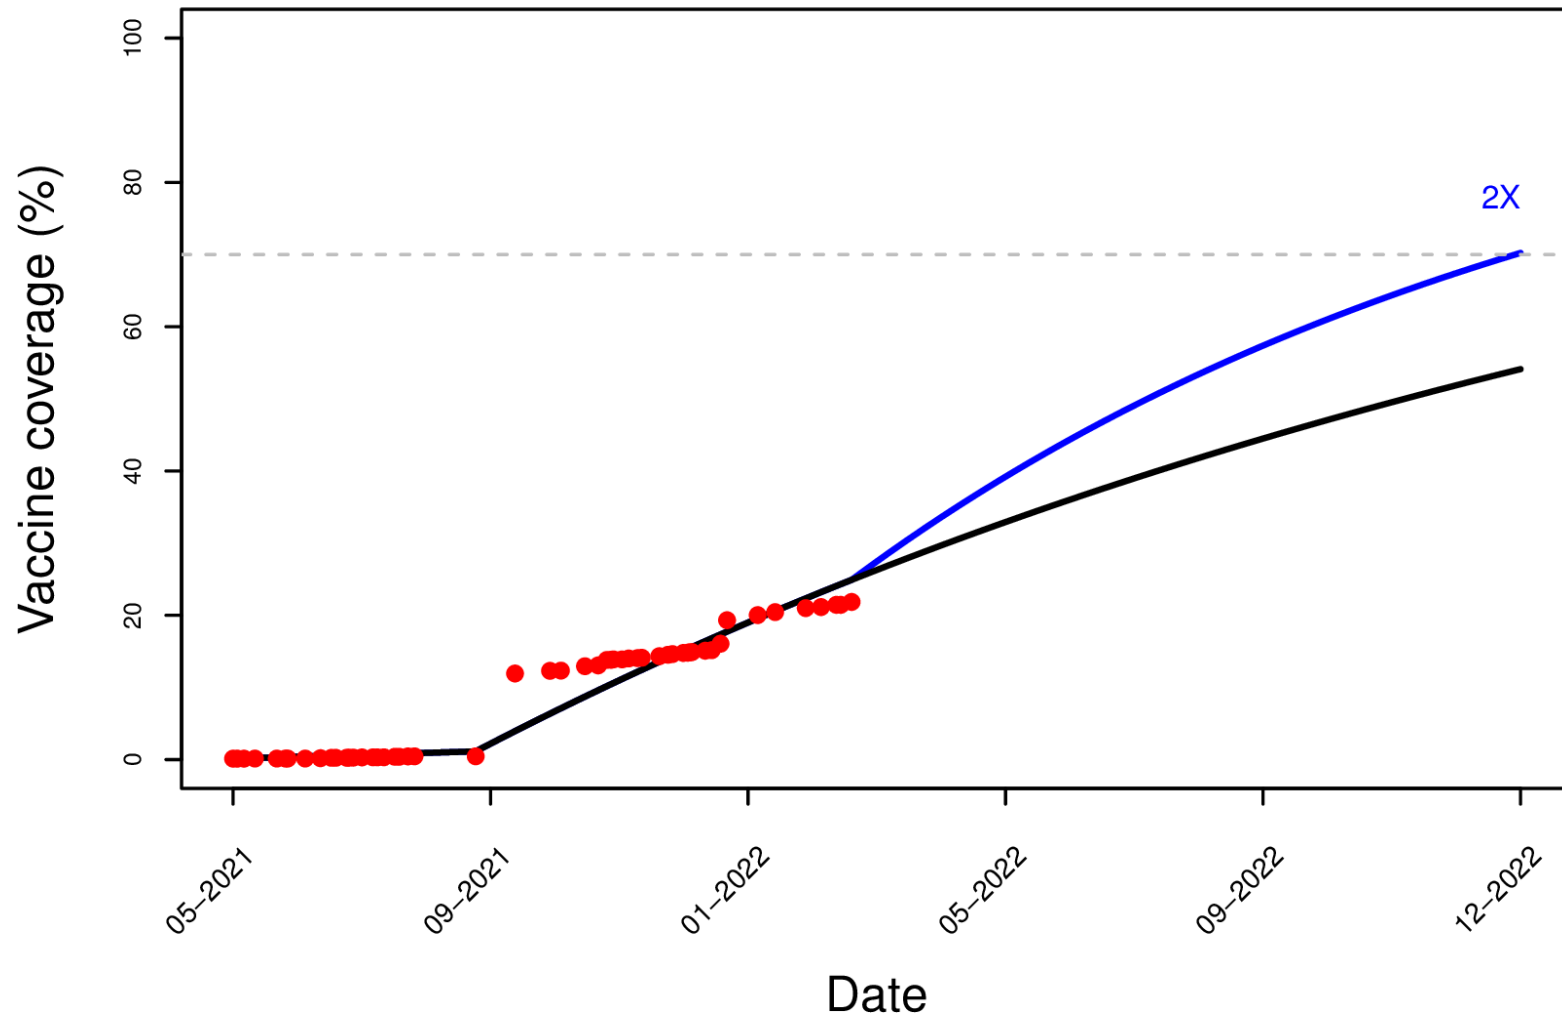

**Supplementary Figure S28:** Graphs showing model vaccination coverage trends from the model (black line) and vaccination coverage data (red dots). The blue lines show vaccine coverage trends when vaccination rates are increased (from current rates) to reach 70% by end of December 2022. Grey dashed lines indicate the 70% coverage target. The numbers show how much vaccination coverage rate should be increased by to reach that target



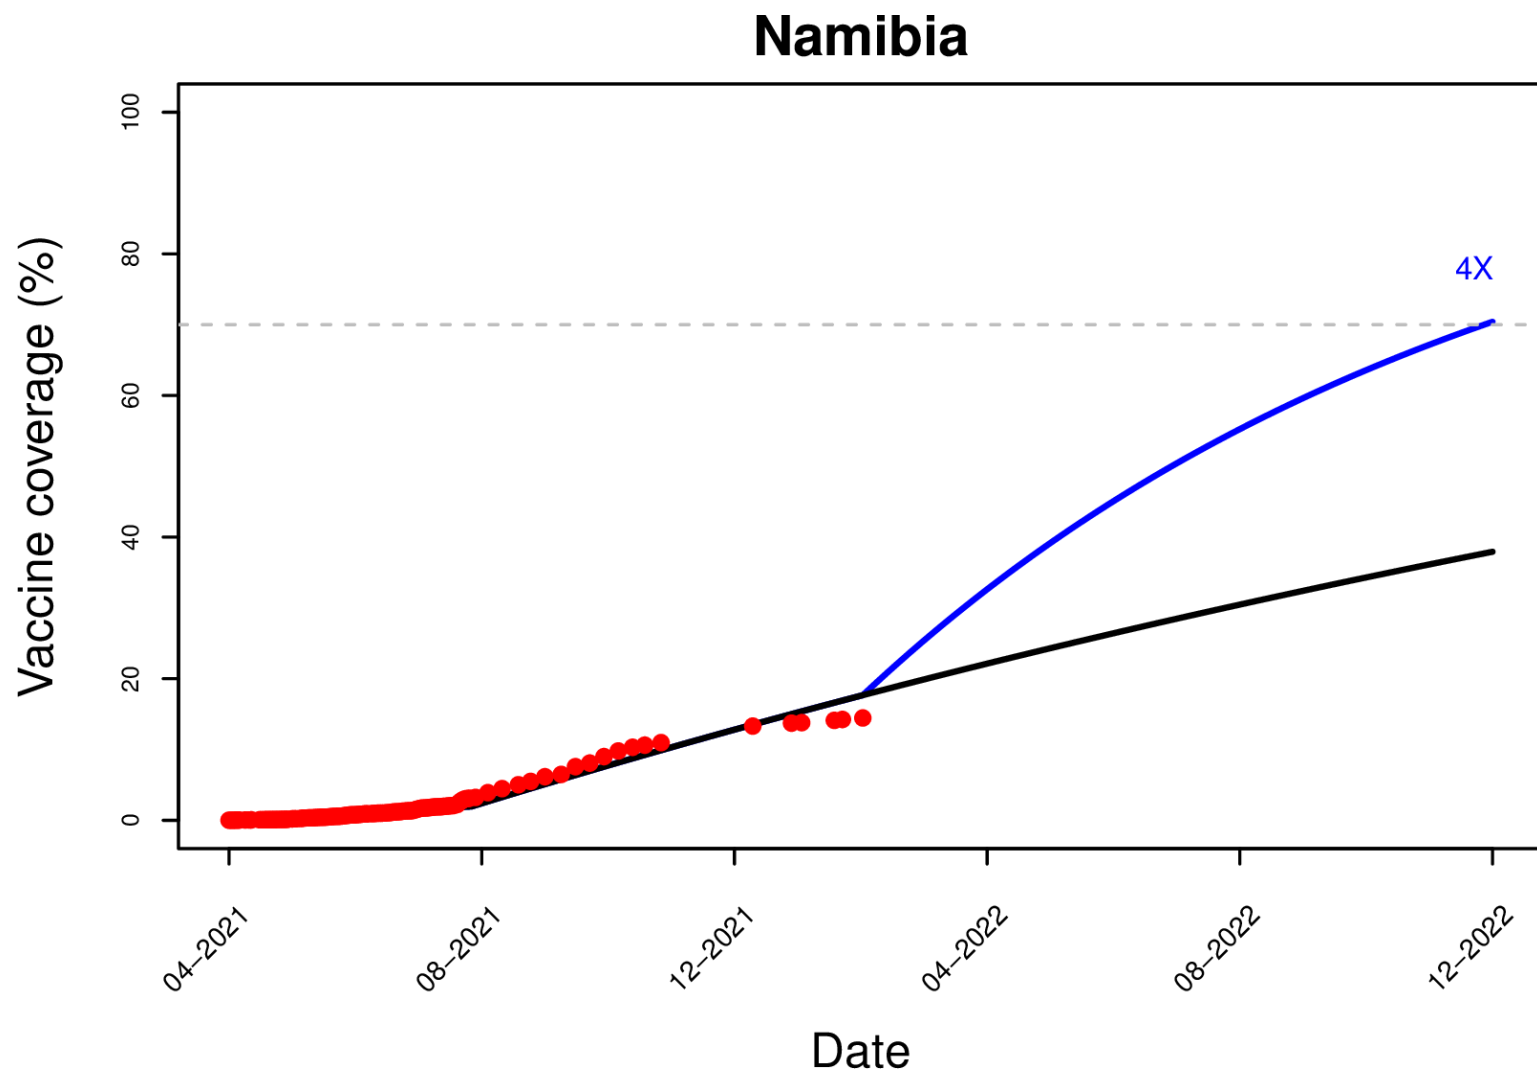

**Supplementary Figure S29:** Graphs showing model vaccination coverage trends from the model (black line) and vaccination coverage data (red dots). The blue lines show vaccine coverage trends when vaccination rates are increased (from current rates) to reach 70% by end of December 2022. Grey dashed lines indicate the 70% coverage target. The numbers show how much vaccination coverage rate should be increased by to reach that target

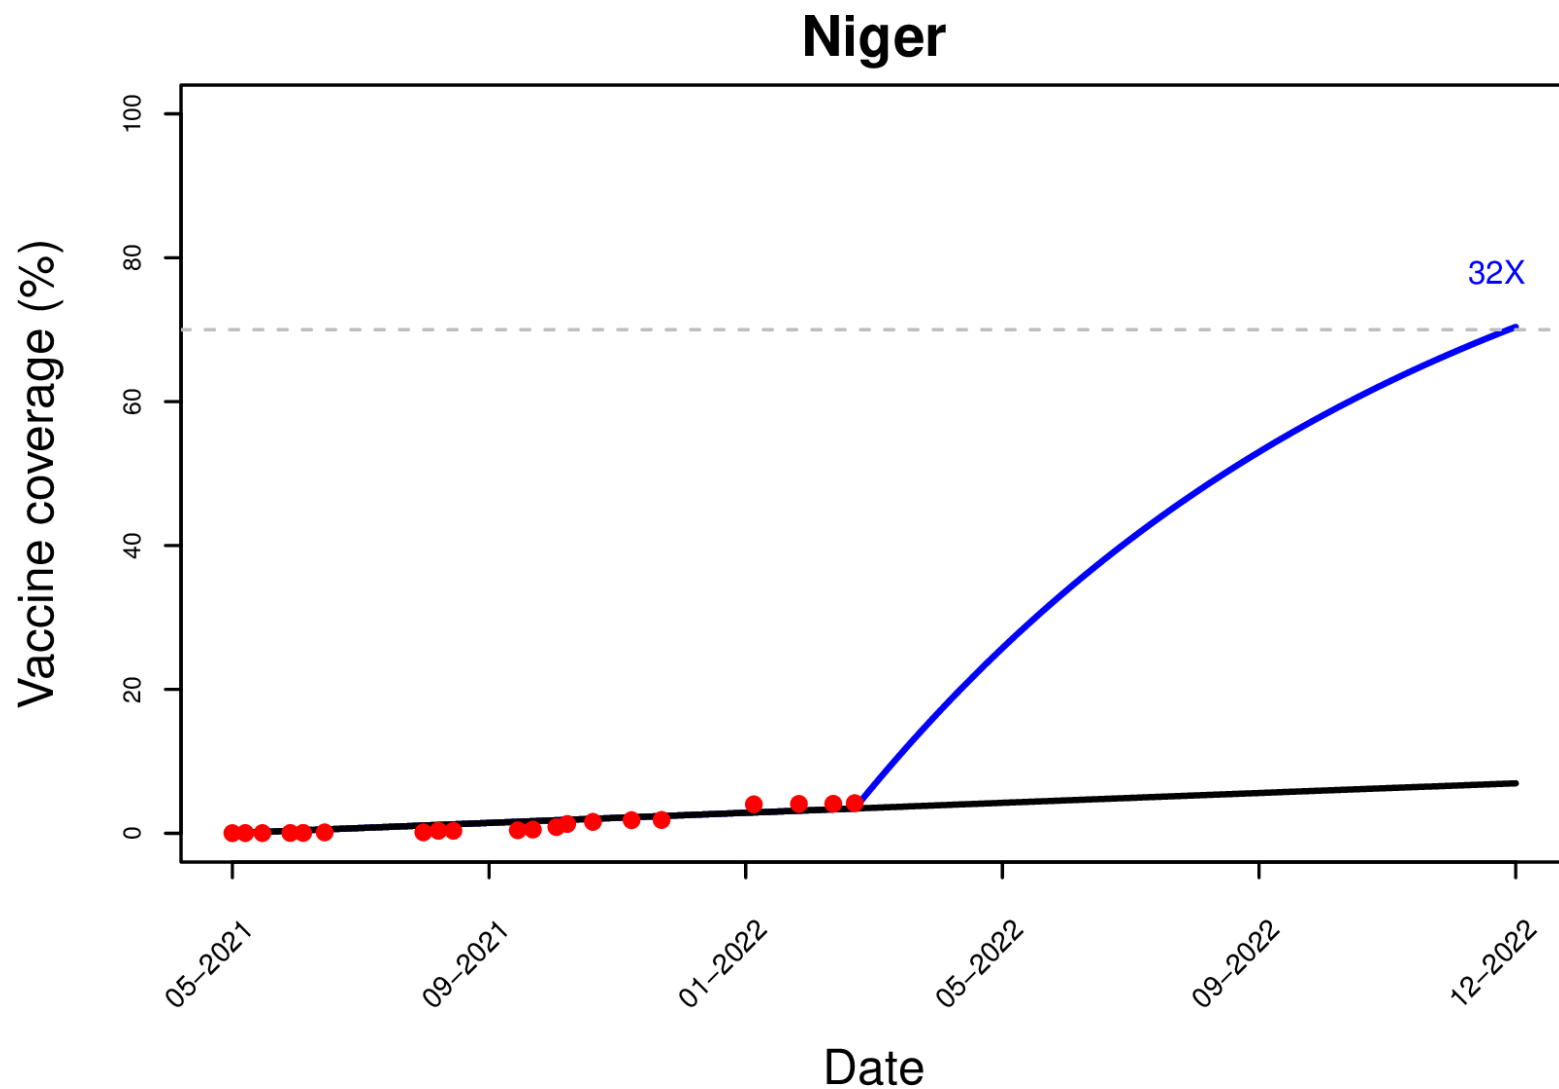

**Supplementary Figure S30:** Graphs showing model vaccination coverage trends from the model (black line) and vaccination coverage data (red dots). The blue lines show vaccine coverage trends when vaccination rates are increased (from current rates) to reach 70% by end of December 2022. Grey dashed lines indicate the 70% coverage target. The numbers show how much vaccination coverage rate should be increased by to reach that target

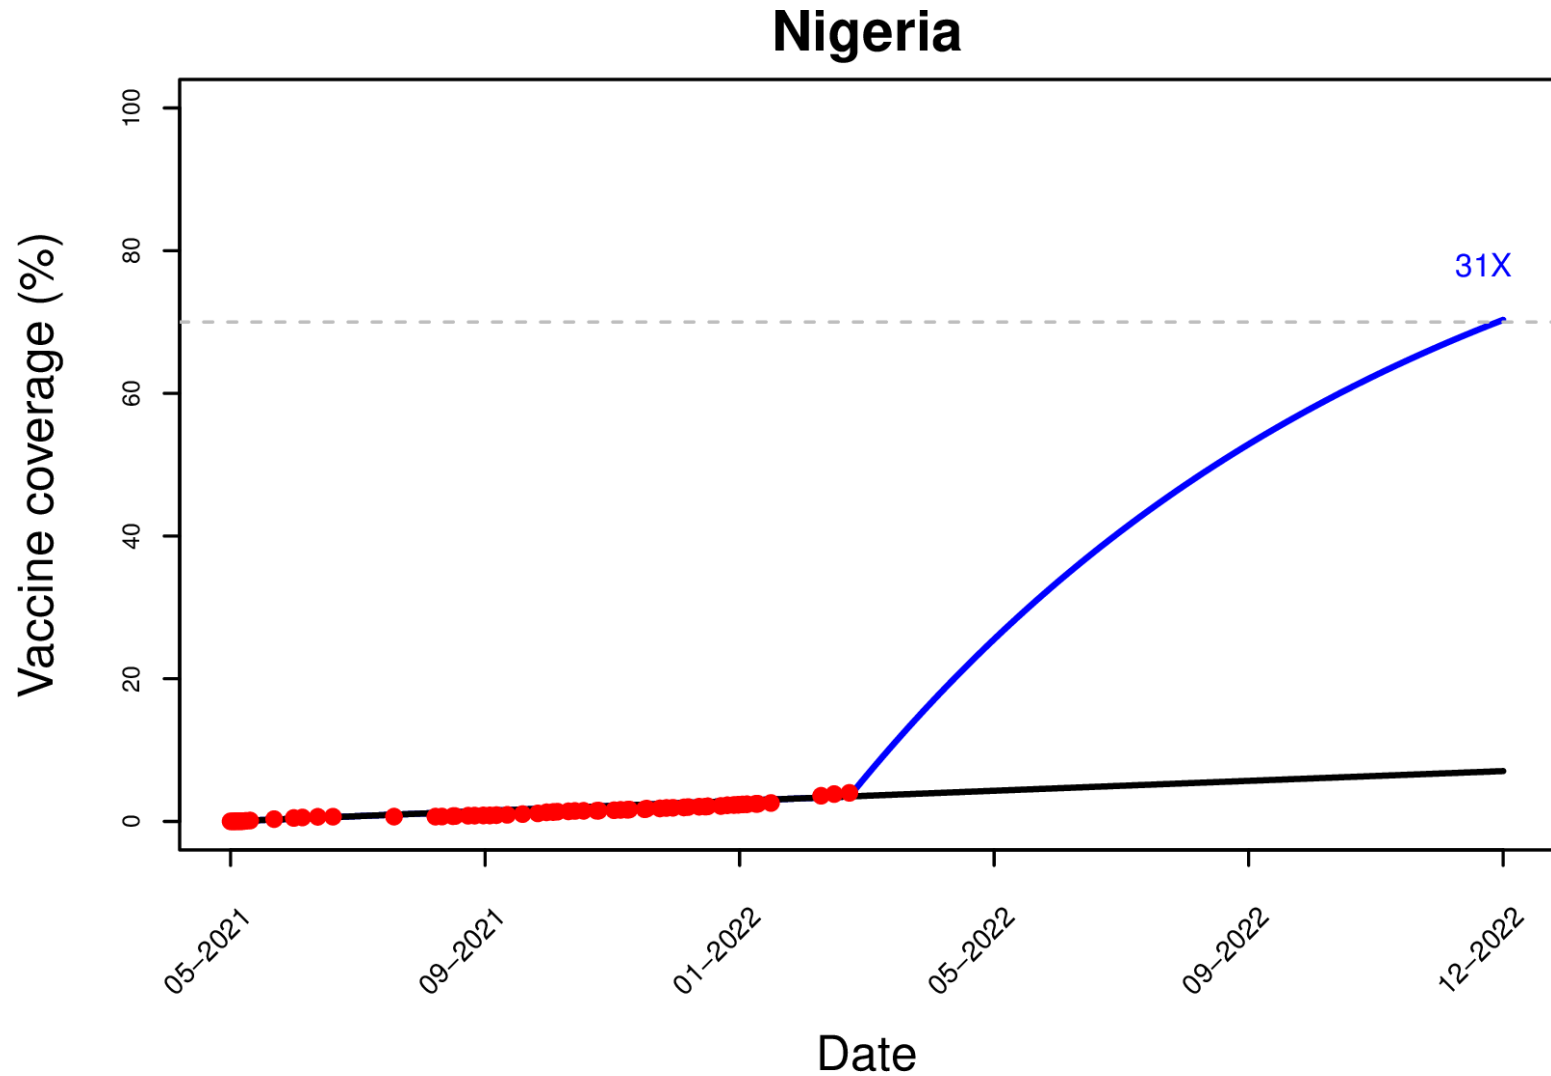

**Supplementary Figure S31:** Graphs showing model vaccination coverage trends from the model (black line) and vaccination coverage data (red dots). The blue lines show vaccine coverage trends when vaccination rates are increased (from current rates) to reach 70% by end of December 2022. Grey dashed lines indicate the 70% coverage target. The numbers show how much vaccination coverage rate should be increased by to reach that target

## Sao Tome and Principe

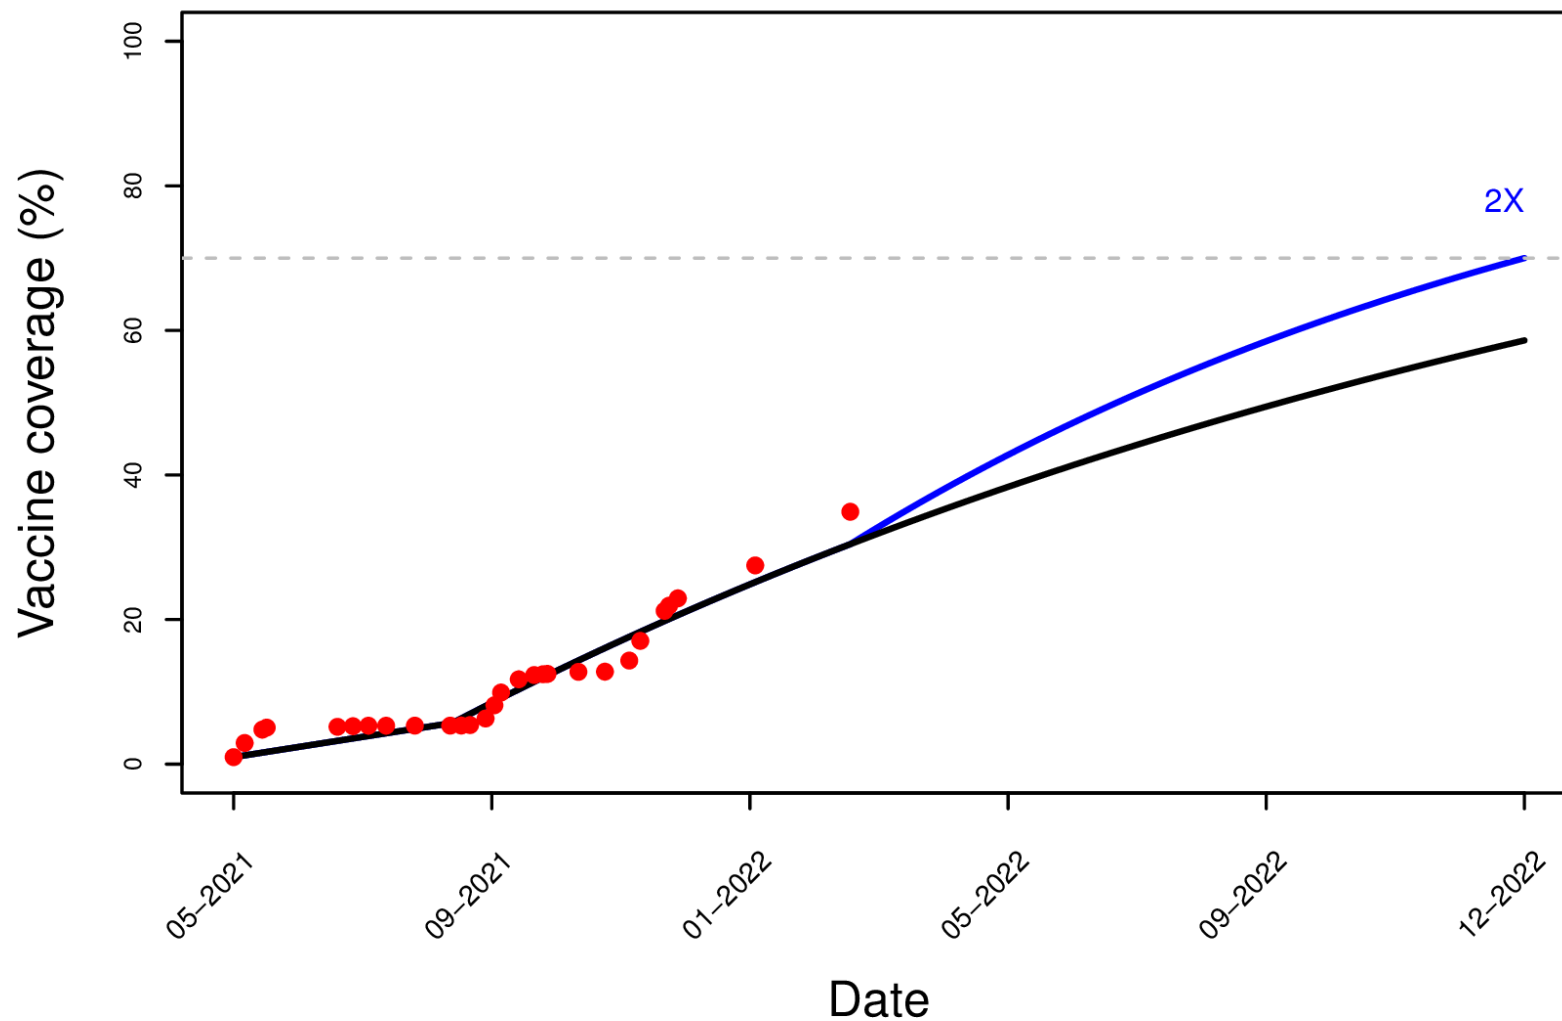

**Supplementary Figure S32:** Graphs showing model vaccination coverage trends from the model (black line) and vaccination coverage data (red dots). The blue lines show vaccine coverage trends when vaccination rates are increased (from current rates) to reach 70% by end of December 2022. Grey dashed lines indicate the 70% coverage target. The numbers show how much vaccination coverage rate should be increased by to reach that target

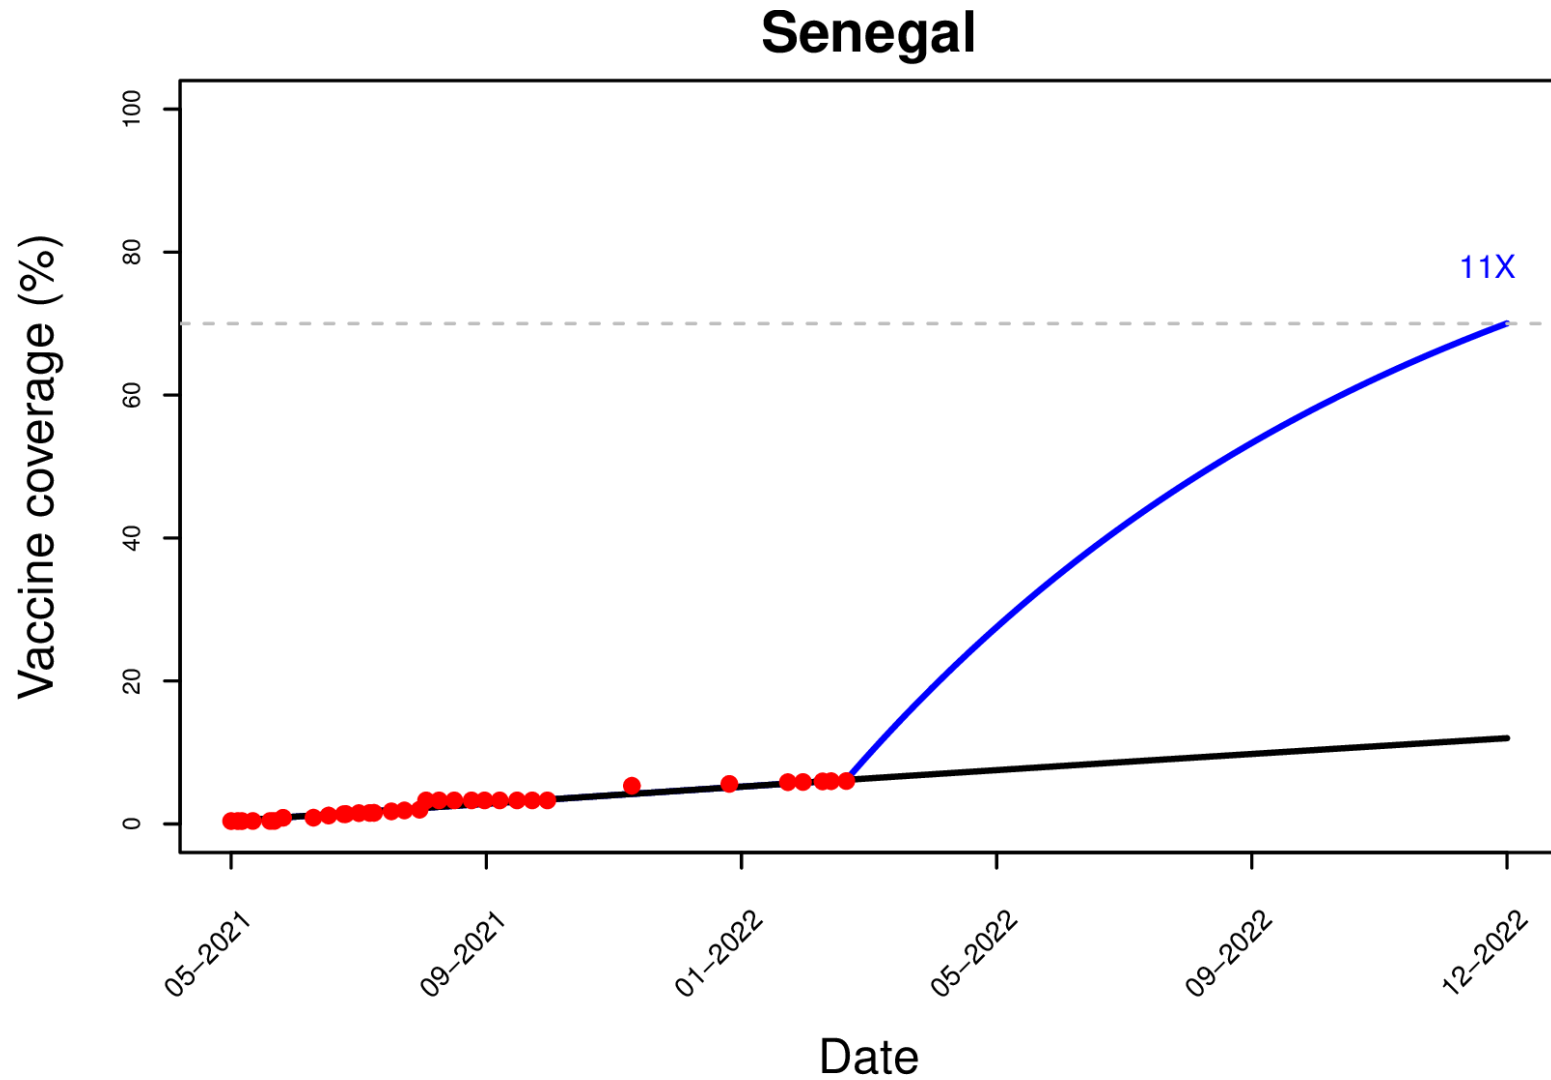

**Supplementary Figure S33:** Graphs showing model vaccination coverage trends from the model (black line) and vaccination coverage data (red dots). The blue lines show vaccine coverage trends when vaccination rates are increased (from current rates) to reach 70% by end of December 2022. Grey dashed lines indicate the 70% coverage target. The numbers show how much vaccination coverage rate should be increased by to reach that target

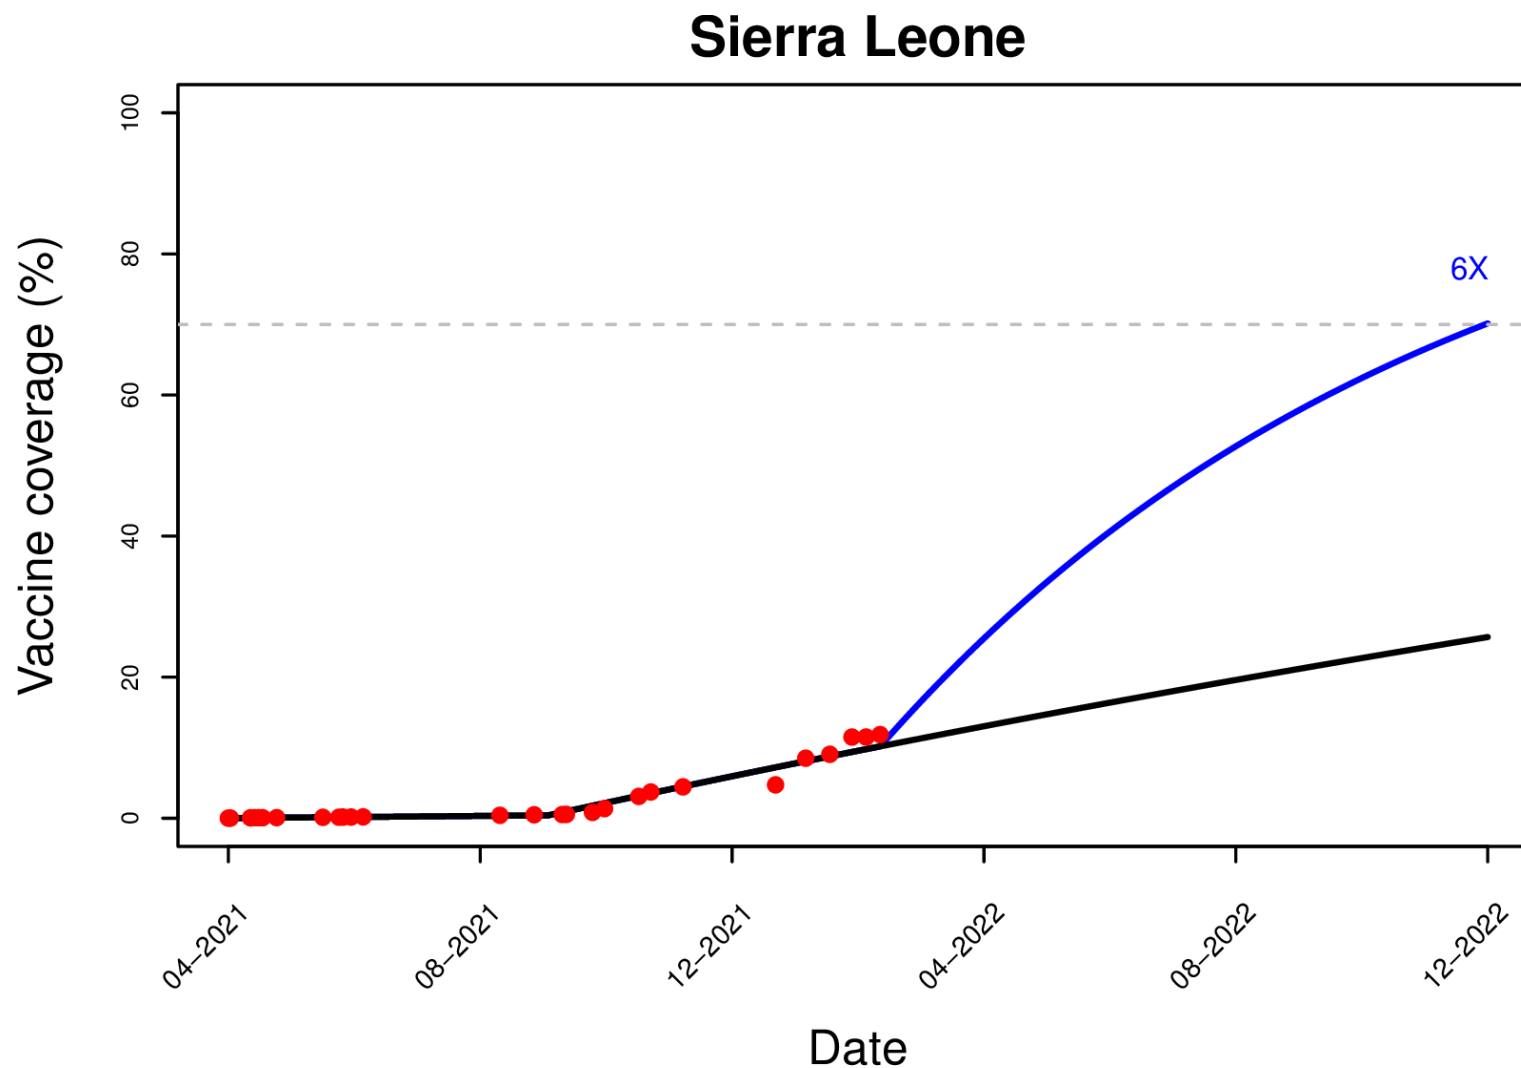

**Supplementary Figure S34:** Graphs showing model vaccination coverage trends from the model (black line) and vaccination coverage data (red dots). The blue lines show vaccine coverage trends when vaccination rates are increased (from current rates) to reach 70% by end of December 2022. Grey dashed lines indicate the 70% coverage target. The numbers show how much vaccination coverage rate should be increased by to reach that target

## Somalia

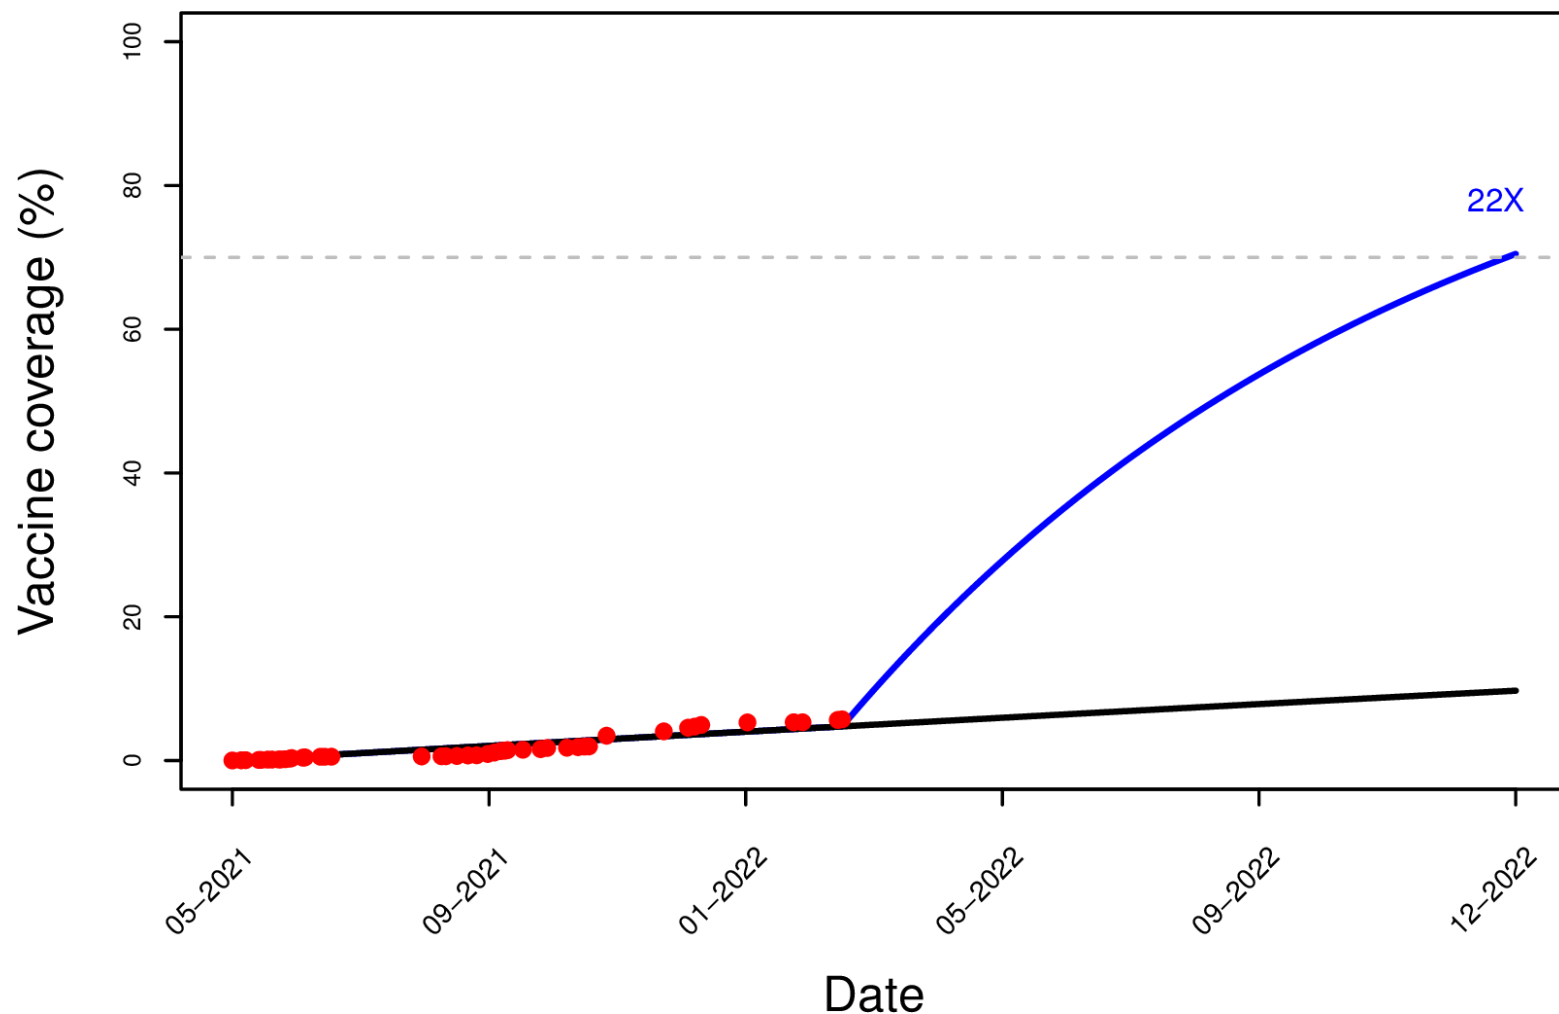

**Supplementary Figure S35:** Graphs showing model vaccination coverage trends from the model (black line) and vaccination coverage data (red dots). The blue lines show vaccine coverage trends when vaccination rates are increased (from current rates) to reach 70% by end of December 2022. Grey dashed lines indicate the 70% coverage target. The numbers show how much vaccination coverage rate should be increased by to reach that target

## South Africa

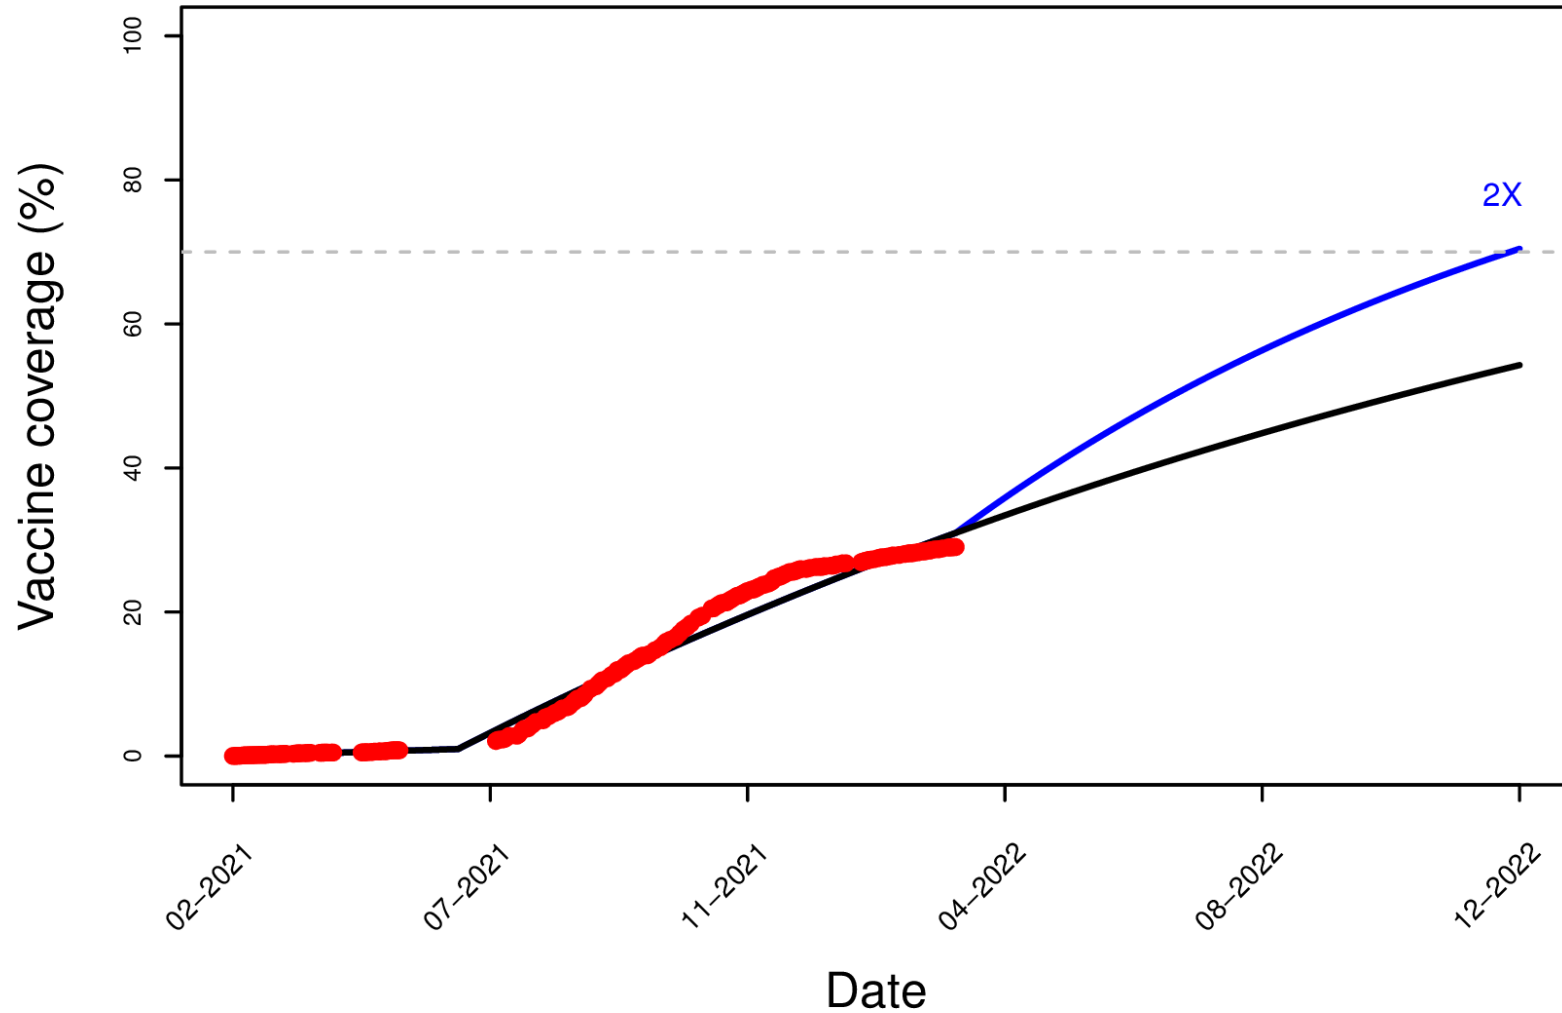

**Supplementary Figure S36:** Graphs showing model vaccination coverage trends from the model (black line) and vaccination coverage data (red dots). The blue lines show vaccine coverage trends when vaccination rates are increased (from current rates) to reach 70% by end of December 2022. Grey dashed lines indicate the 70% coverage target. The numbers show how much vaccination coverage rate should be increased by to reach that target



## South Sudan

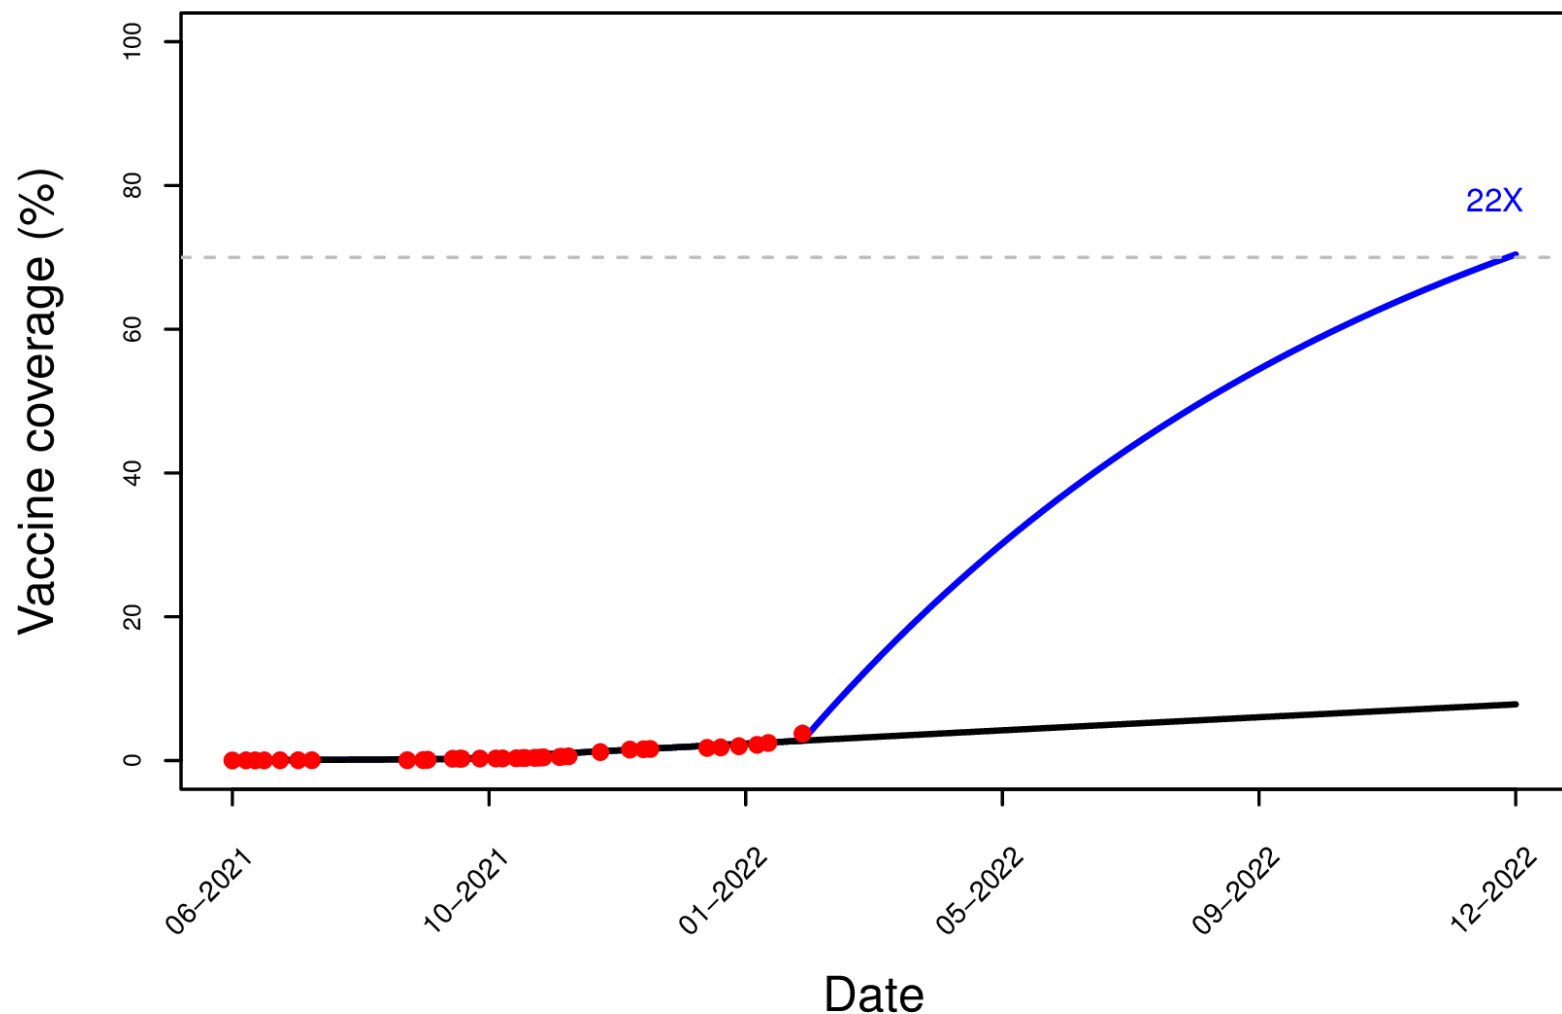

**Supplementary Figure S37:** Graphs showing model vaccination coverage trends from the model (black line) and vaccination coverage data (red dots). The blue lines show vaccine coverage trends when vaccination rates are increased (from current rates) to reach 70% by end of December 2022. Grey dashed lines indicate the 70% coverage target. The numbers show how much vaccination coverage rate should be increased by to reach that target

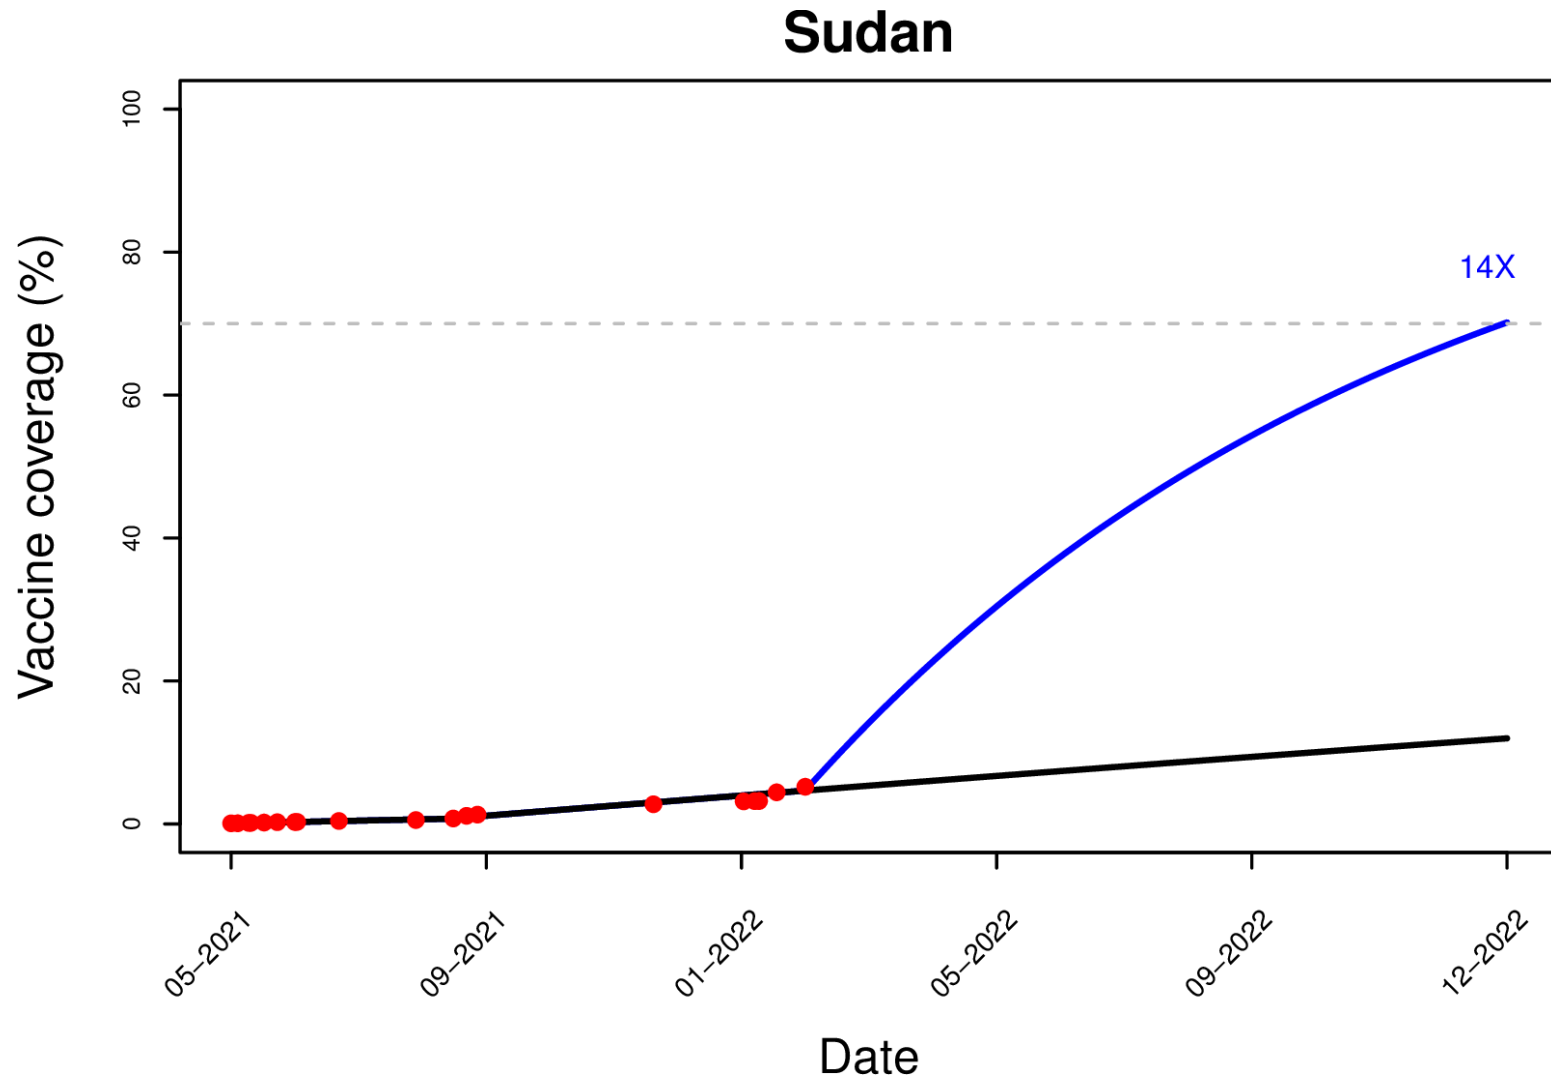

**Supplementary Figure S38:** Graphs showing model vaccination coverage trends from the model (black line) and vaccination coverage data (red dots). The blue lines show vaccine coverage trends when vaccination rates are increased (from current rates) to reach 70% by end of December 2022. Grey dashed lines indicate the 70% coverage target. The numbers show how much vaccination coverage rate should be increased by to reach that target

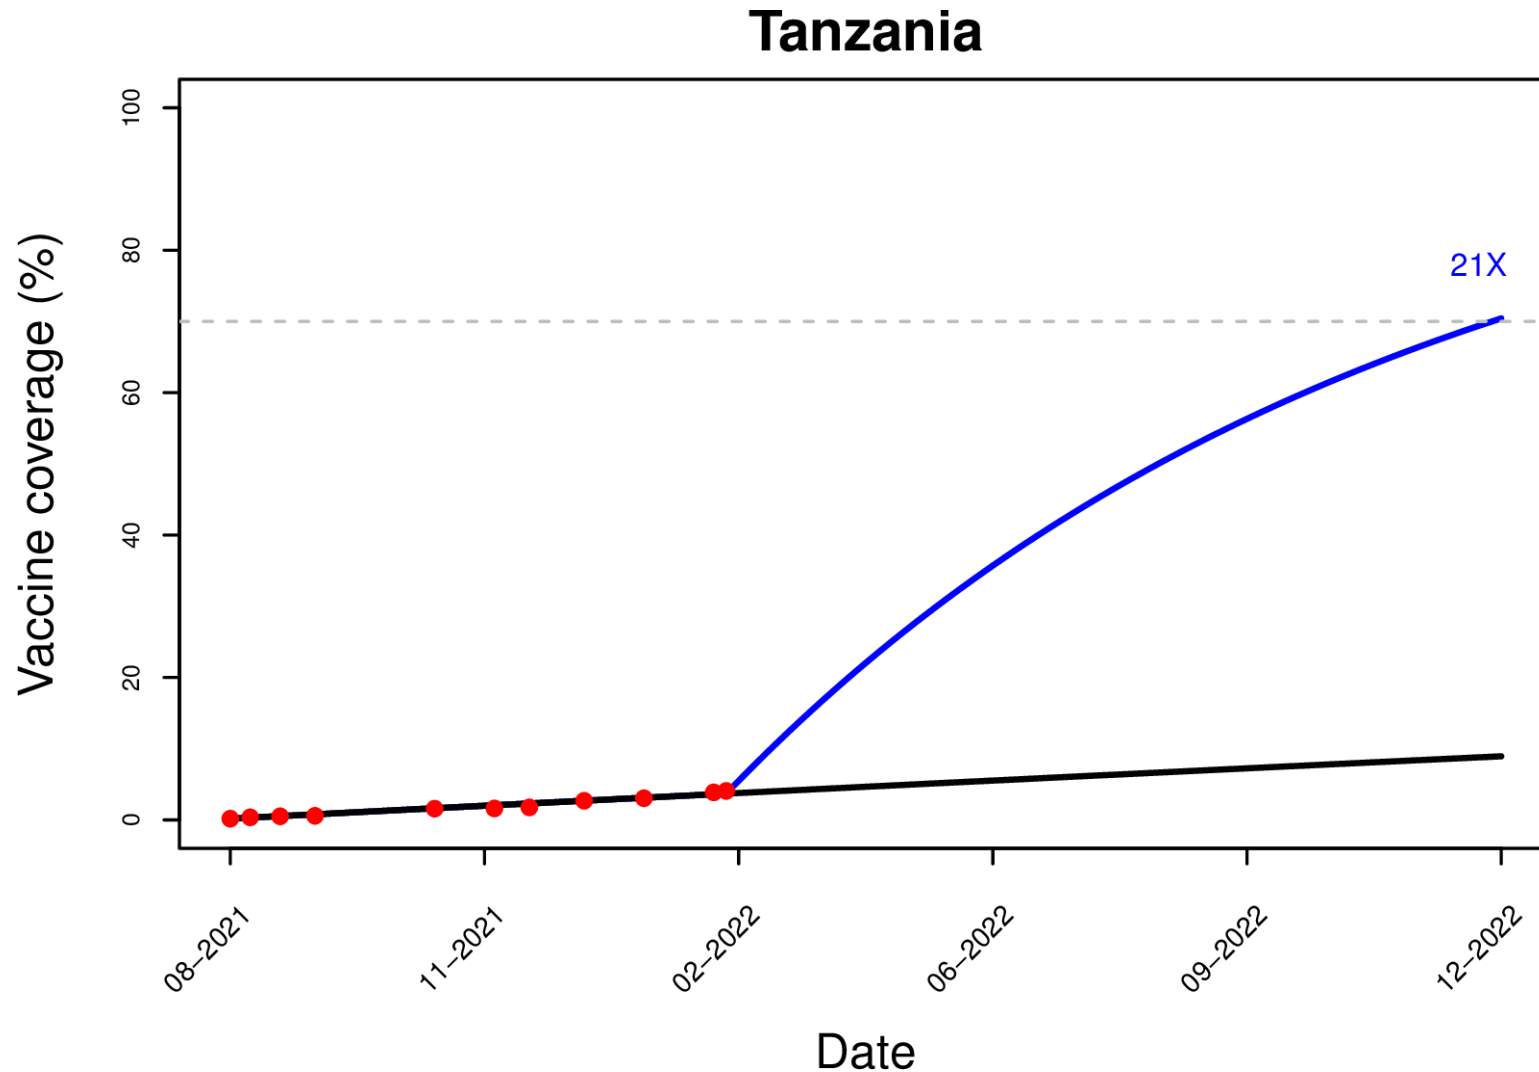

**Supplementary Figure S39:** Graphs showing model vaccination coverage trends from the model (black line) and vaccination coverage data (red dots). The blue lines show vaccine coverage trends when vaccination rates are increased (from current rates) to reach 70% by end of December 2022. Grey dashed lines indicate the 70% coverage target. The numbers show how much vaccination coverage rate should be increased by to reach that target

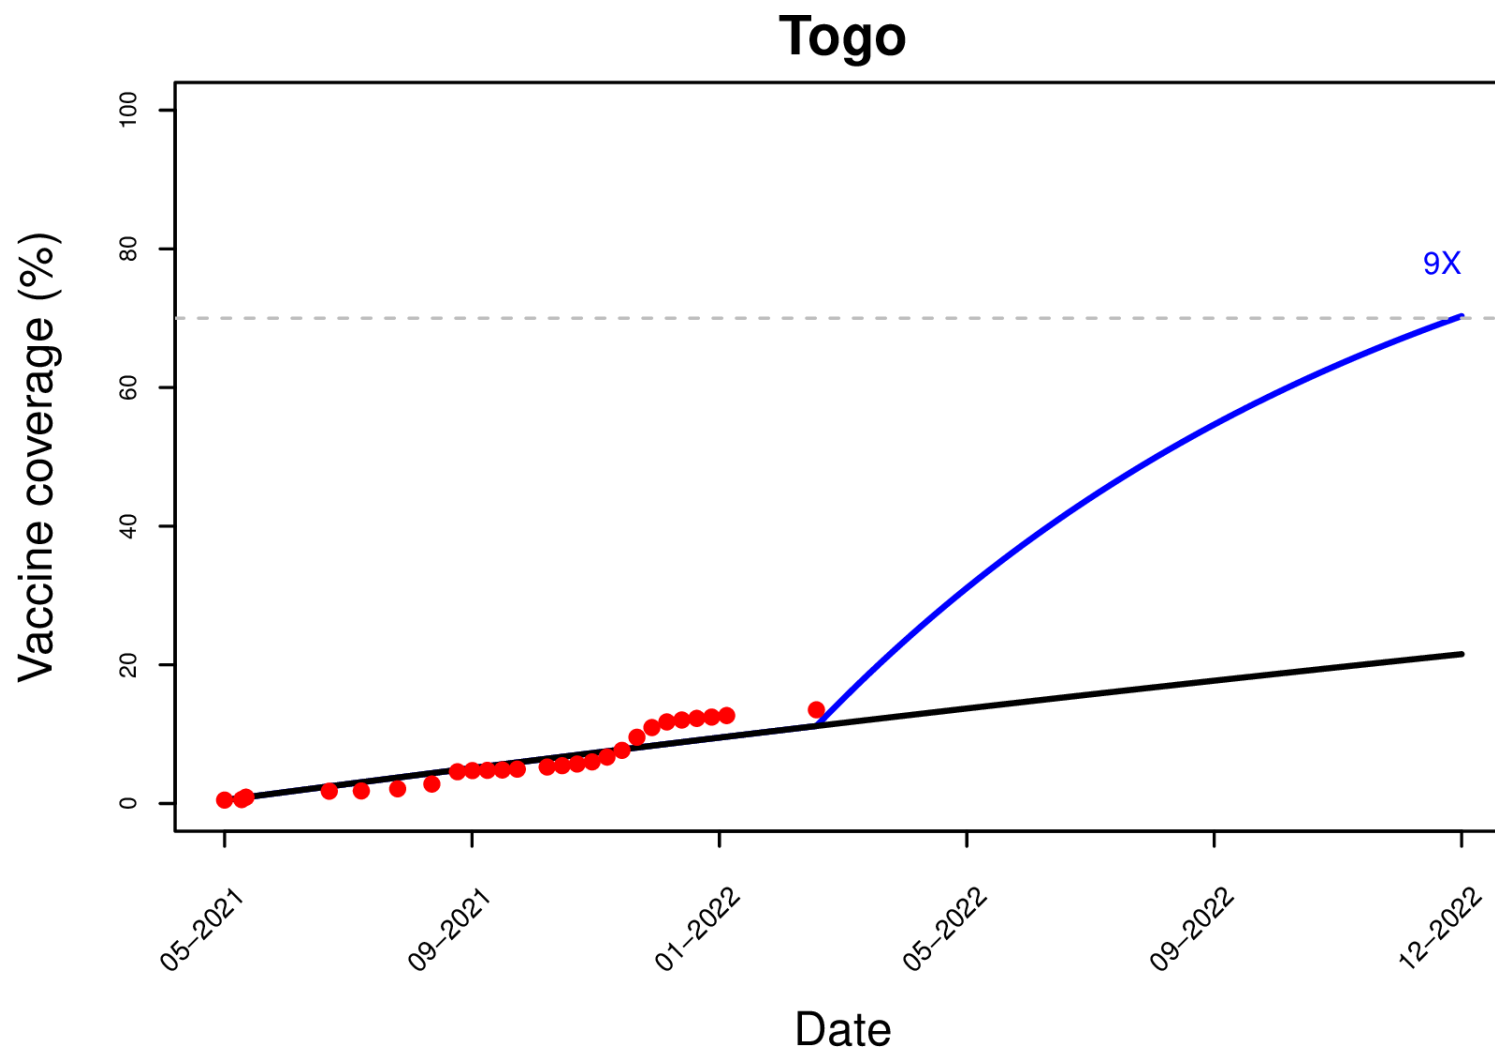

**Supplementary Figure S40:** Graphs showing model vaccination coverage trends from the model (black line) and vaccination coverage data (red dots). The blue lines show vaccine coverage trends when vaccination rates are increased (from current rates) to reach 70% by end of December 2022. Grey dashed lines indicate the 70% coverage target. The numbers show how much vaccination coverage rate should be increased by to reach that target

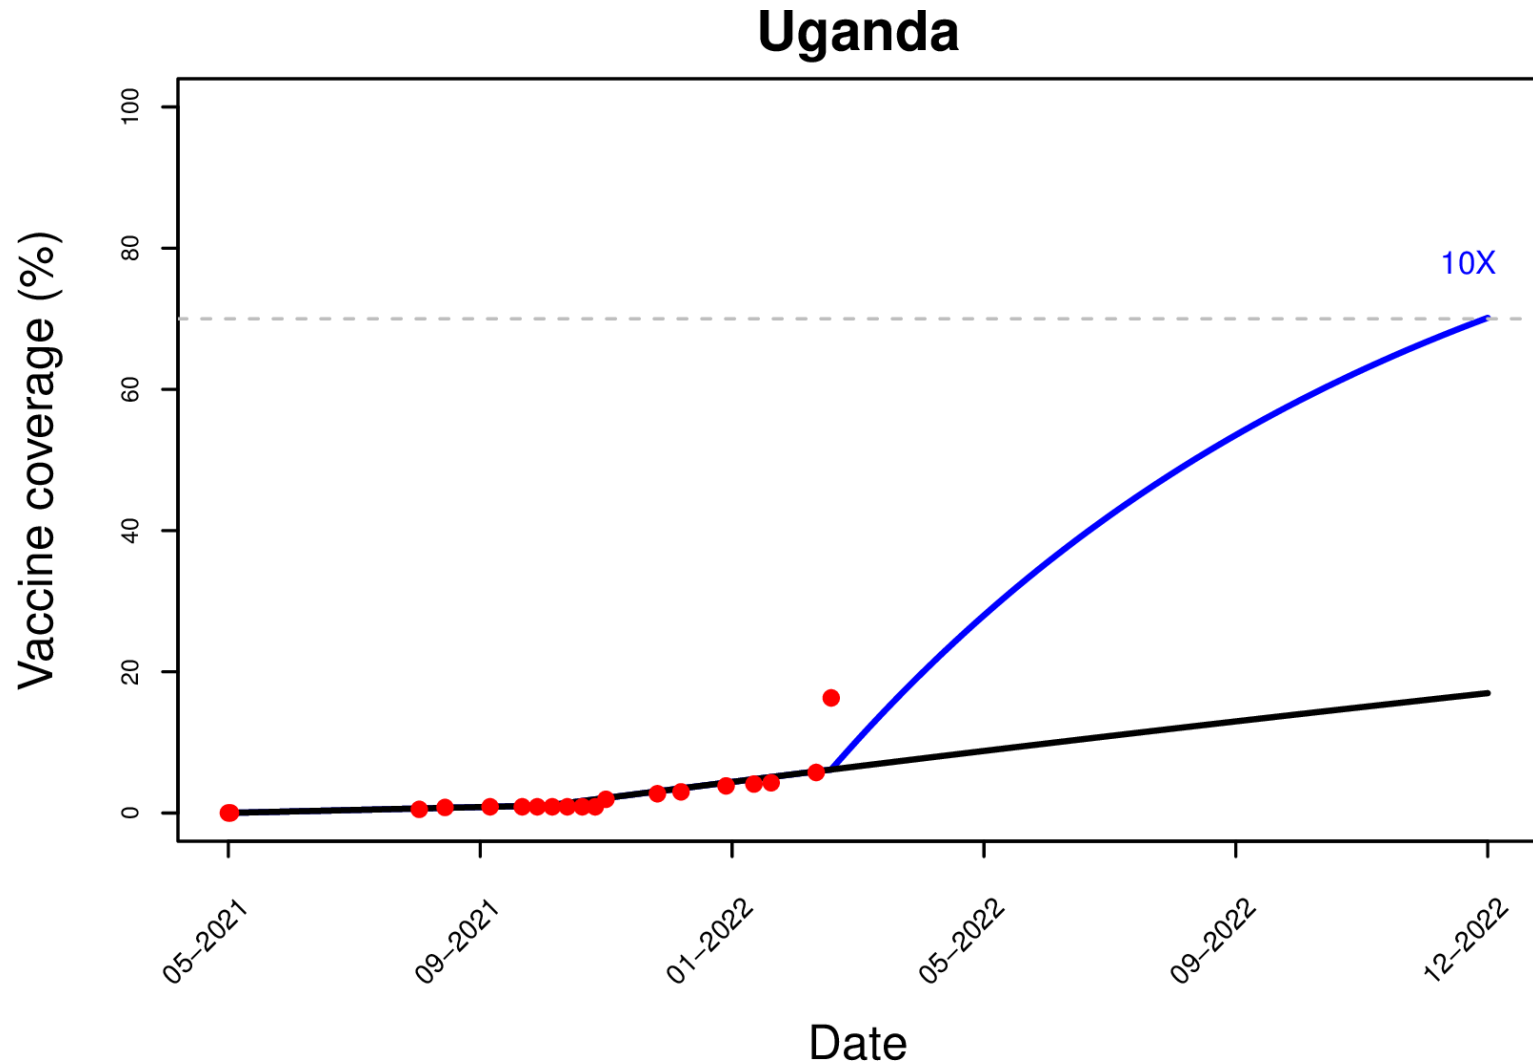

**Supplementary Figure S41:** Graphs showing model vaccination coverage trends from the model (black line) and vaccination coverage data (red dots). The blue lines show vaccine coverage trends when vaccination rates are increased (from current rates) to reach 70% by end of December 2022. Grey dashed lines indicate the 70% coverage target. The numbers show how much vaccination coverage rate should be increased by to reach that target

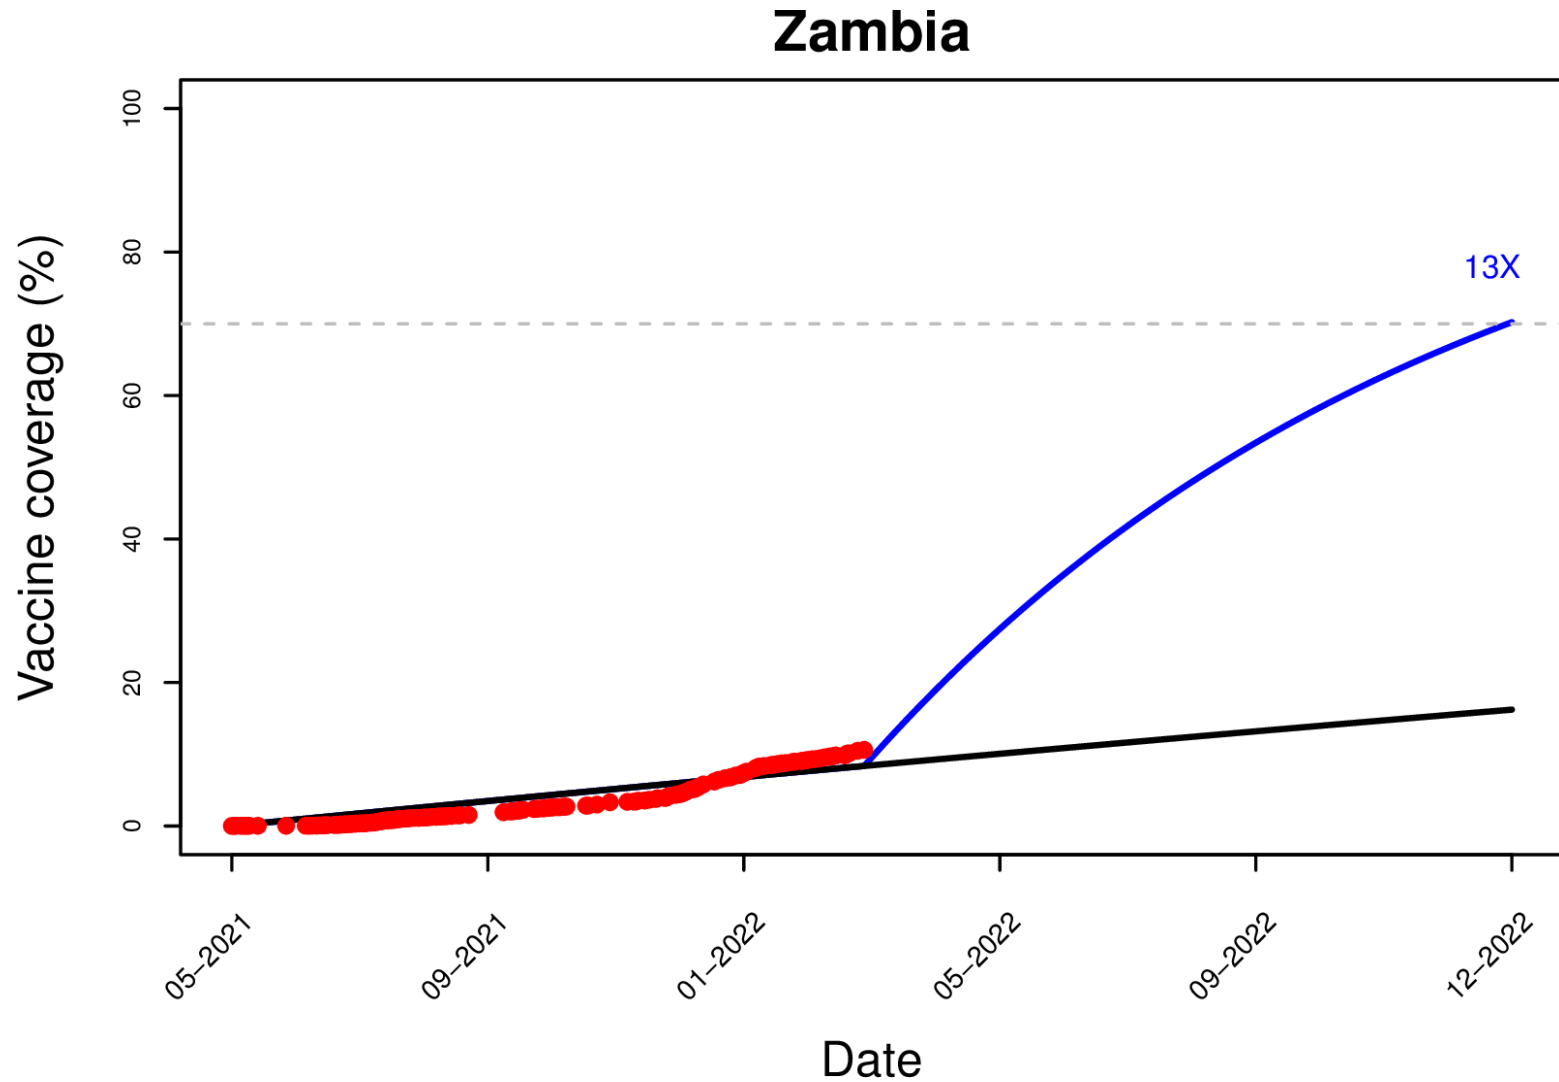

**Supplementary Figure S42:** Graphs showing model vaccination coverage trends from the model (black line) and vaccination coverage data (red dots). The blue lines show vaccine coverage trends when vaccination rates are increased (from current rates) to reach 70% by end of December 2022. Grey dashed lines indicate the 70% coverage target. The numbers show how much vaccination coverage rate should be increased by to reach that target

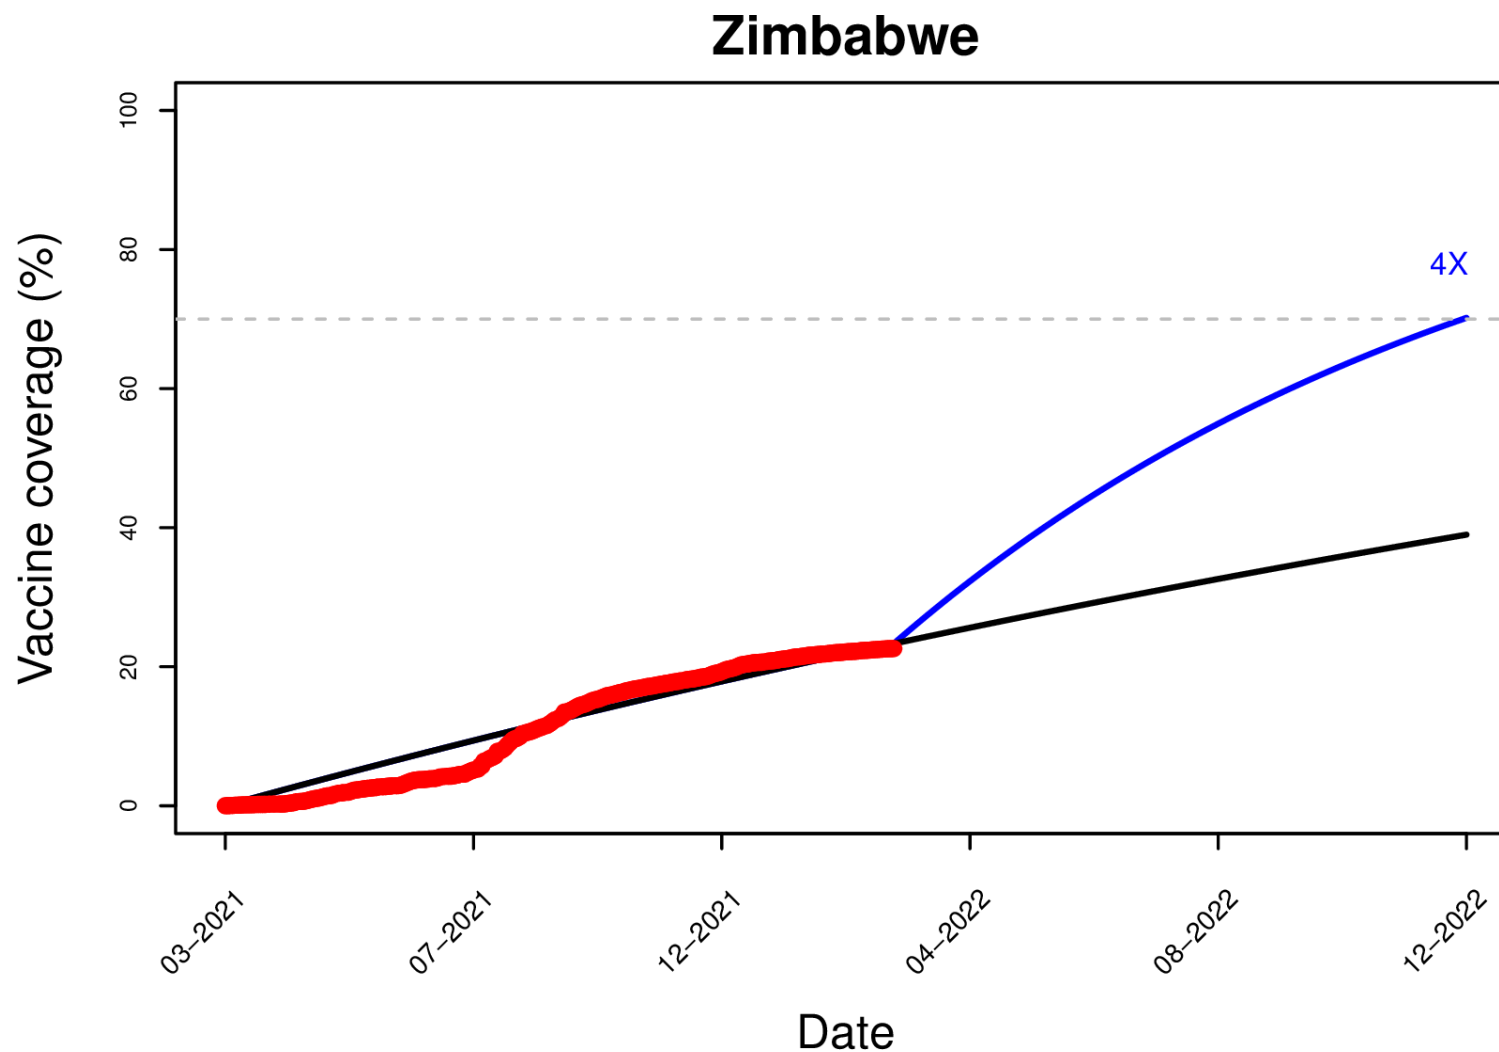

**Supplementary Figure S43:** Graphs showing model vaccination coverage trends from the model (black line) and vaccination coverage data (red dots). The blue lines show vaccine coverage trends when vaccination rates are increased (from current rates) to reach 70% by end of December 2022. Grey dashed lines indicate the 70% coverage target. The numbers show how much vaccination coverage rate should be increased by to reach that target

## References

1. Our World in Data. Coronavirus (COVID-19) Vaccinations. 2023. <https://ourworldindata.org/covid-vaccinations> (accessed 05 October 2023).
2. UN Department of Economic and Social Affairs Population Dynamics. World population prospects 2019. 2019. <https://population.un.org/wpp/Download/Standard/Population/> (accessed May 14, 2022).
3. Our World in Data. Coronavirus Pandemic (COVID-19). May 14, 2022. <https://ourworldindata.org/coronavirus> (accessed May 14, 2022).
4. The World Bank. Life expectancy at birth, total (years). 2022. <https://data.worldbank.org/indicator/SP.DYN.LE00.IN> (accessed May 14, 2022).
5. The world Bank. World Bank Country and Lending Groups. 2022. <https://datahelpdesk.worldbank.org/knowledgebase/articles/906519-world-bank-country-and-lending-groups> (accessed May 14, 2022).
6. Li Q, Guan X, Wu P, et al. Early Transmission Dynamics in Wuhan, China, of Novel Coronavirus-Infected Pneumonia. *N Engl J Med* 2020; **382**(13): 1199-207.
7. Backer JA, Klinkenberg D, Wallinga J. Incubation period of 2019 novel coronavirus (2019-nCoV) infections among travellers from Wuhan, China, 20-28 January 2020. *Euro Surveill* 2020; **25**(5).
8. Africa Centres for Disease Control and Prevention. COVID-19 Vaccination. 2022. <https://africacdc.org/covid-19-vaccination/> (accessed May 14, 2022).
9. Hall VJ, Foulkes S, Saei A, et al. COVID-19 vaccine coverage in health-care workers in England and effectiveness of BNT162b2 mRNA vaccine against infection (SIREN): a prospective, multicentre, cohort study. *Lancet* 2021; **397**(10286): 1725-35.
